# Supplementary material for: Nickel catalyzed regio- and stereoselective arylation and methylation of allenamides via coupling reactions. An experimental and computational study
Source: Royal Society of Chemistry journal article supplement (doi:10.1039/c8qo00729b), 2018-01-01
Supplement: c8qo00729b2.pdf [file c8qo00729b2.pdf]

# Nickel Catalyzed Regio- and Stereoselective Arylation and Methylation of Allenamides via Coupling Reactions. An Experimental and Computational Study

Yang Liu,<sup>1</sup> Alessandro Cerveri,<sup>1</sup> Assunta De Nisi,<sup>1</sup> Magda Monari,<sup>1</sup>  
Olalla Nieto Faza,<sup>2</sup> Carlos Silva López<sup>2\*</sup> and Marco Bandini<sup>1\*</sup>

1. Dipartimento di Ciemica “G. Ciamician” Alma Mater Studiorum – Universit di Bologna, via Selmi 2, 40126 Bologna, Italy
2. Departamento de Química Orgánica, Universidade de Vigo, Lagoas Marcosende, 36310, Vigo, Galicia, Spain

\*Correspondence: [carlos.silva@uvigo.es](mailto:carlos.silva@uvigo.es); [marco.bandini@unibo.it](mailto:marco.bandini@unibo.it)

## Contents

|          |                                                                                               |            |
|----------|-----------------------------------------------------------------------------------------------|------------|
| <b>1</b> | <b>Alternative mechanism: Allenamide first and phenylboronate second</b>                      | <b>S-3</b> |
| <b>2</b> | <b><math>\alpha</math>- vs. <math>\gamma</math>-attack in the three-component variant</b>     | <b>S-3</b> |
| <b>3</b> | <b>ZnMe<sub>2</sub> vs. PhB(OH)<sub>2</sub> in the three-component variant with aldehydes</b> | <b>S-4</b> |
| <b>4</b> | <b>Energy Span Model</b>                                                                      | <b>S-5</b> |
| <b>5</b> | <b>Ni(II) vs. Ni(I) activation</b>                                                            | <b>S-6</b> |
| <b>6</b> | <b>Cartesian Coordinates</b>                                                                  | <b>S-8</b> |
| 6.1      | Isomers of the pre-catalyst . . . . .                                                         | S-8        |
| 6.2      | Ni/B mechanism . . . . .                                                                      | S-10       |
| 6.3      | 3 component extension of the Ni/B mechanism . . . . .                                         | S-20       |

*Contents*

6.4 Ni/Zn mechanism via a non-redox pathway . . . . . S-23  
6.5 Ni/Zn mechanism via a redox pathway . . . . . S-31

## 1 Alternative mechanism: Allenamide first and phenylboronate second

A mechanism in which the order of participation of the reagents is inverted was also considered. However, the key transition state in which the phenyl fragment migrates onto the cumulene carbon atom of the allenamide is very high in energy (43.1 kcal/mol with respect to the resting state of the catalyst, **A**) and the corresponding mechanism is therefore not competitive.

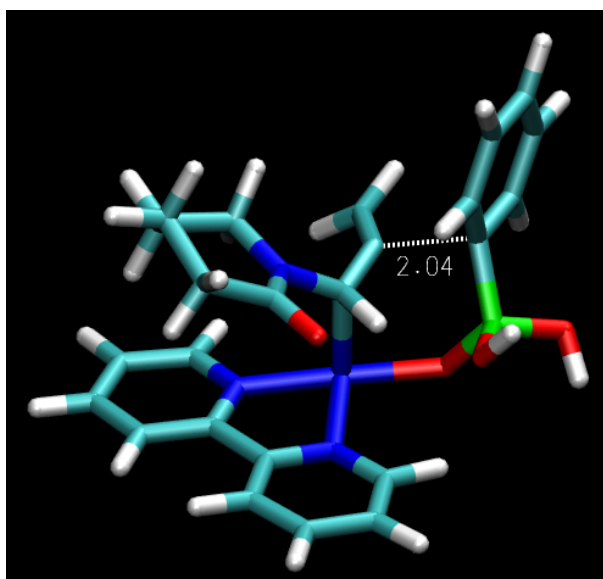

**Figure S6:** Computed the phenyl migration transition state for the alternative mechanism where allenamide is complexed to nickel prior to the participation of the phenylboronate. Key bond length for the forming C—C bond is given in Å.

## 2 $\alpha$ - vs. $\gamma$ -attack in the $\text{PhB}(\text{OH})_2$ -mediated three-component variant with acetaldehyde

The two alternative nucleophilic attacks for the Ni-allenyl derivative **D** onto acetaldehyde are represented in Figure S7. It can be observed that the  $\alpha$ -product is kinetically more favoured but thermodynamically unstable given the 2.6 kcal/mol barrier to revert from the adduct to **D**.

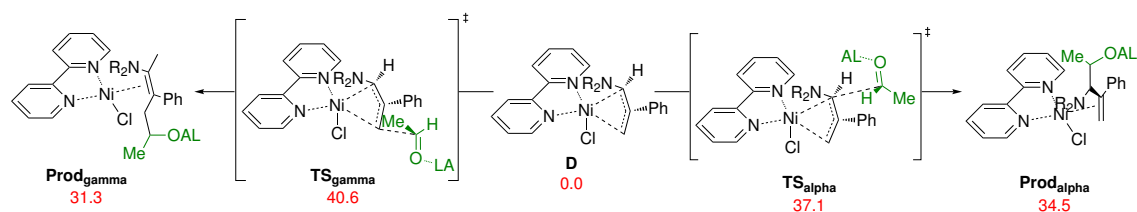

**Figure S7:** Computed mechanism for the  $\text{ZnMe}_2$ -mediated organonickel insertion onto N-allenyl amines (Gibbs free energies in kcal/mol).

### 3 $\text{ZnMe}_2$ vs. $\text{PhB}(\text{OH})_2$ in the three-component variant with aldehydes

The computed pathway for the three-component non-redox catalytic cycle of the  $\text{ZnMe}_2$ -mediated insertion to N-allenyl amines is provided below. A comparative analysis with the mechanism found for the phenylboronic transmetallating agent (Scheme 4 in the manuscript) suggests that the main differences between these two reagents are not due to different intermediates or chemical steps. actually, most steps found for  $\text{ZnMe}_2$  are essentially mimics of what was described earlier with the phenylboronic acid. however, all the steps where  $\text{ZnMe}_2$  participates (A to C) display reduced energy requirements compared to the boronic analog (14.0 vs. 20.6 kcal/mol), in good agreement with the enhanced reactivity observed in the former. The main differences between the two reaction mechanisms appear in the electronic structure of the intermediates. With  $\text{ZnMe}_2$  all the steps occur in the singlet spin state up to the late attack onto the aldehyde ( $\text{TS}_{EF}$ ). In this step the reactivity trends seem to revert due to boron derivatives being better Lewis acids than zinc complexes. This explains why we could not find a transition state for such a nucleophilic attack in the singlet surface. On the triplet surface, however, a transition state corresponding to this process could be located. It is noteworthy that, unlike in the boron mechanism, this is not an irrelevant step in terms of the energy barrier (18.6 kcal/mol) and therefore small spin-orbit couplings could render this attack unfeasible under the thermal conditions used. This last finding increased the urgency for an alternative redox mechanism. We considered also that the improved kinetics could be a consequence of a completely different mechanism operating in this case since  $\text{ZnMe}_2$  could access redox chemistry that is not available to boron derivatives. This line of thinking was supported by a sudden color change in the reaction flask that was never observed when phenylboronic acid was employed.

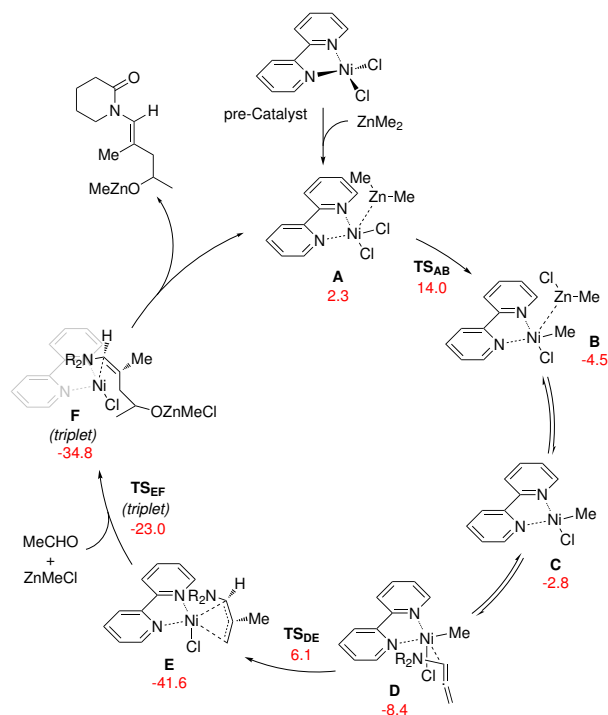

**Figure S8:** Computed mechanism for the  $\text{ZnMe}_2$ -mediated organonickel insertion onto N-allenyl amines (Gibbs free energies in kcal/mol).

## 4 Energy Span Model

We used the Energy Span Model by Kozuch and Shaik to account for the degree of competition between the two alternative mechanisms computed for the  $\text{ZnMe}_2$ -mediated three-component variant of the reaction. This model assumes an adiabatic energy profile for the mechanism and relies on the transition state theory (TST). Using TST on adiabatic surfaces also implies that all the intermediates are considered to be fully relaxed at each step of the reaction profile (no dynamic effects are considered in the model). These assumptions have to be taken with some care for the non-redox pathway since it involves singlet-triplet surface crosses that are spin forbidden. Here we have used the triplet transition state in the energy span model taking no consideration of the spin flip event. This is to say that we are therefore obtaining an upper limit for the reaction rate for that mechanism, since we are considering that the spin flip event does not affect the rate of the reaction. The results thus obtained suggest that the most favourable profile is the non-redox one, with an energy span of 20.7 kcal/mol vs 36.5 kcal/mol for the redox one.

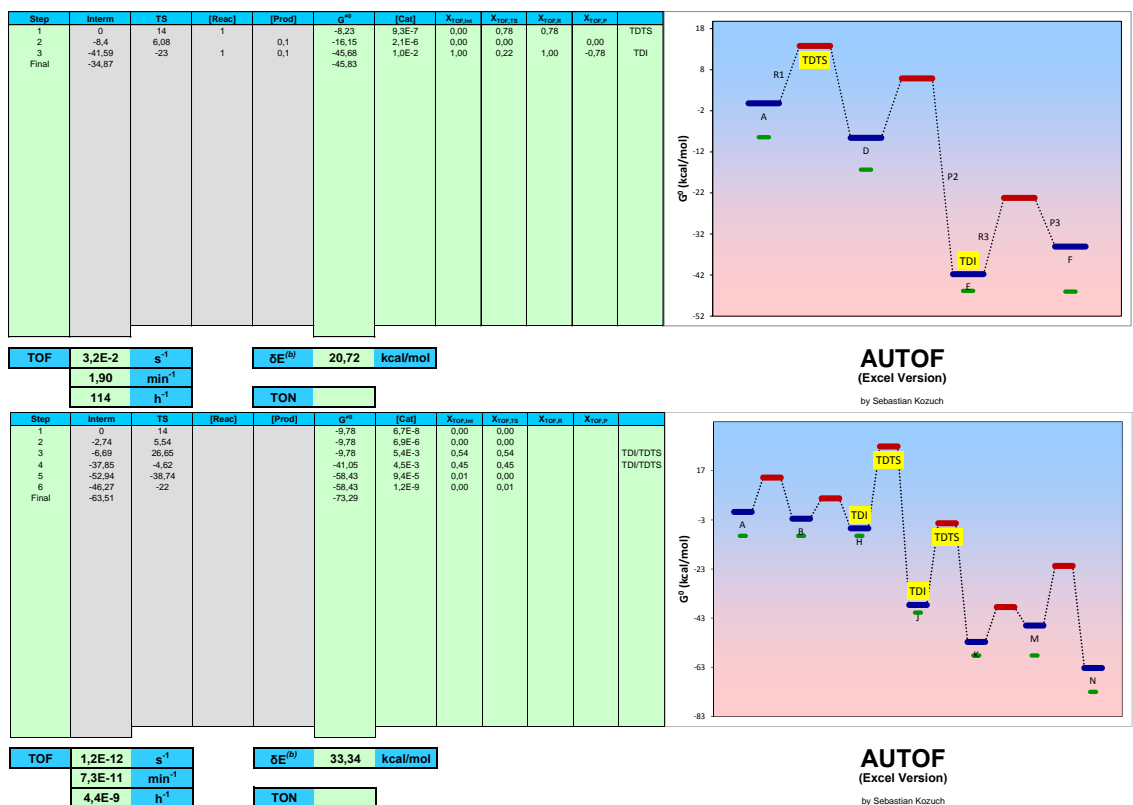

**Figure S9:** Energy Span Model results for the ZnMe<sub>2</sub>-mediated three-component variant of the cross-coupling reaction (the non-redox version at the top and the redox alternative at the bottom).

## 5 Ni(II) vs. Ni(I) activation

In a previous communication on this chemistry (Org. Lett., 2017, 19, 5034) a referee asked for the possibility of Ni(I) species being actually activating this chemistry. At the time we had not considered this option due to the absence of an obvious reducing agent in the reaction mixture, but we rationalized that the inertness of the catalyst with respect to the addition of iodo-arenes suggested that these species were not present/participating in the reaction mechanism. Nevertheless, in the current work we decided to explore the Ni(I) chemistry computationally to determine whether this catalyst could also activate the coupling process. The energy profiles obtained suggest that indeed Ni(I)-based catalyst could promote the formation of the enamide however at a significantly slower rate than Ni(II) complexes (see the energy profiles in Figure S10).

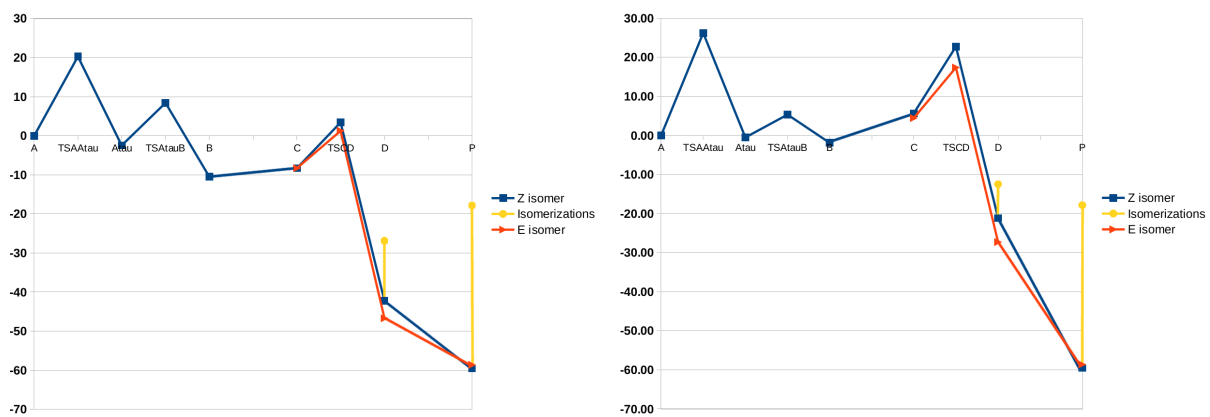

**Figure S10:** Gibbs free energy profiles (in kcal/mol, 1 Atm, 298K) for the allenamide formation with Ni(II) (left) and Ni(I) catalysts (right).

## 6 Cartesian Coordinates

Structure names correspond to the labels in the manuscript with a few exceptions where self explanatory names have been used for structures with no label in the main manuscript (like boronate, precatalyst or solvated pre-catalyst).

### 6.1 Isomers of the pre-catalyst

Pre-catalyst 2  
 SCF Energy: -3075.5949063  
 ZPE-corrected Energy: -3075.38374  
 $\Delta U$ : -3075.36392  
 $\Delta H$ : -3075.36297  
 $\Delta G$ : -3075.43582

Num. Imaginary Frequencies: 0

|    |           |           |           |
|----|-----------|-----------|-----------|
| N  | 0.562927  | -1.286963 | -0.020986 |
| C  | 0.446831  | -2.617963 | -0.029465 |
| C  | 1.553390  | -3.460960 | -0.021887 |
| C  | 2.825023  | -2.900619 | -0.004204 |
| C  | 2.947411  | -1.515325 | 0.004212  |
| C  | 1.795477  | -0.733413 | -0.004913 |
| H  | -0.580936 | -2.998051 | -0.044234 |
| H  | 1.405375  | -4.544781 | -0.029256 |
| H  | 3.718613  | -3.533359 | 0.003581  |
| H  | 3.935895  | -1.048198 | 0.020123  |
| C  | 1.796109  | 0.732185  | 0.002622  |
| N  | 0.564011  | 1.286801  | 0.016129  |
| C  | 0.449033  | 2.617916  | 0.022453  |
| C  | 1.556319  | 3.459956  | 0.015563  |
| C  | 2.827507  | 2.898509  | 0.001310  |
| C  | 2.948734  | 1.513104  | -0.005130 |
| Ni | -0.885883 | 0.000530  | -0.000374 |
| H  | -0.578403 | 2.998930  | 0.035633  |
| H  | 1.409211  | 4.543913  | 0.021010  |
| H  | 3.721645  | 3.530486  | -0.005426 |
| H  | 3.936855  | 1.045127  | -0.018531 |
| O  | -1.452317 | -0.129646 | 2.696548  |
| H  | -1.904231 | 0.651775  | 2.327247  |
| H  | -1.916448 | -0.860077 | 2.246623  |
| O  | -1.475971 | 0.129053  | -2.694773 |
| Cl | -2.464399 | 1.559309  | 0.080733  |
| Cl | -2.466200 | -1.557134 | -0.071831 |
| H  | -1.935707 | 0.859903  | -2.241053 |
| H  | -1.924227 | -0.651948 | -2.320133 |

Pre-catalyst 3  
 SCF Energy: -3075.59792136  
 ZPE-corrected Energy: -3075.38617  
 $\Delta U$ : -3075.36813  
 $\Delta H$ : -3075.36718  
 $\Delta G$ : -3075.43318

Num. Imaginary Frequencies: 0

|    |           |           |           |
|----|-----------|-----------|-----------|
| N  | 1.641917  | -0.196198 | 0.164101  |
| C  | 2.778363  | -0.876854 | -0.002284 |
| C  | 3.958094  | -0.256455 | -0.400515 |
| C  | 3.948441  | 1.112751  | -0.641506 |
| C  | 2.763043  | 1.820192  | -0.468502 |
| C  | 1.621161  | 1.137110  | -0.061142 |
| H  | 2.715669  | -1.954337 | 0.185747  |
| H  | 4.867276  | -0.852434 | -0.521828 |
| H  | 4.857464  | 1.631846  | -0.962747 |
| H  | 2.727312  | 2.897999  | -0.650434 |
| C  | 0.320319  | 1.767574  | 0.185693  |
| N  | -0.627888 | 0.905722  | 0.612033  |
| C  | -1.852813 | 1.347270  | 0.898228  |
| C  | -2.192790 | 2.692481  | 0.774713  |
| C  | -1.229121 | 3.588976  | 0.332141  |
| C  | 0.050040  | 3.122663  | 0.034459  |
| Ni | -0.086085 | -0.935379 | 0.520227  |
| H  | -2.579387 | 0.602329  | 1.231848  |
| H  | -3.209145 | 3.015793  | 1.016158  |
| H  | -1.466424 | 4.651669  | 0.216799  |
| H  | 0.825190  | 3.810893  | -0.314668 |
| O  | -1.837410 | -1.533955 | 0.908387  |
| H  | -1.807508 | -2.508805 | 0.962264  |
| H  | -2.502325 | -1.266484 | 0.137905  |
| O  | -0.462760 | -0.778031 | -1.949574 |
| Cl | 0.534810  | -3.041868 | 0.481449  |
| Cl | -3.468840 | -0.527922 | -1.241857 |
| H  | -1.441811 | -0.614019 | -1.913510 |
| H  | -0.382701 | -1.742436 | -2.038115 |

Pre-catalyst  
 SCF Energy: -3075.60141207  
 ZPE-corrected Energy: -3075.38971  
 $\Delta U$ : -3075.37084  
 $\Delta H$ : -3075.36990  
 $\Delta G$ : -3075.43721

$S^2$  before (0.9953) and after higher multiplicity projection (0.0137)

Num. Imaginary Frequencies: 0

|    |           |           |           |
|----|-----------|-----------|-----------|
| N  | -0.976891 | -1.048339 | -0.259675 |
| C  | -1.337317 | -2.324739 | -0.322607 |
| C  | -2.671691 | -2.718619 | -0.288789 |
| C  | -3.646142 | -1.731237 | -0.172792 |
| C  | -3.259740 | -0.397007 | -0.091325 |
| C  | -1.900165 | -0.083296 | -0.135250 |
| H  | -0.519684 | -3.053706 | -0.399040 |
| H  | -2.935993 | -3.778719 | -0.346587 |
| H  | -4.707933 | -1.997459 | -0.137255 |
| H  | -4.014199 | 0.387704  | 0.015544  |
| C  | -1.369113 | 1.295154  | -0.033493 |
| N  | -0.029699 | 1.397702  | -0.006073 |
| C  | 0.555389  | 2.587559  | 0.093289  |
| C  | -0.182042 | 3.766539  | 0.171221  |
| C  | -1.570069 | 3.680891  | 0.142076  |
| C  | -2.175045 | 2.431411  | 0.038337  |
| Ni | 0.963367  | -0.389723 | -0.075465 |
| H  | 1.653779  | 2.574148  | 0.106032  |
| H  | 0.329499  | 4.730167  | 0.253617  |
| H  | -2.186416 | 4.584498  | 0.199931  |
| H  | -3.265572 | 2.349981  | 0.011189  |
| O  | 1.113909  | -0.296958 | -2.277448 |
| H  | 1.270198  | -1.218757 | -2.549331 |
| H  | 2.011809  | 0.099589  | -2.174769 |
| O  | 1.907124  | -2.343474 | -0.237105 |
| H  | 2.804569  | -1.948727 | -0.302791 |
| H  | 1.755038  | -2.430829 | 0.739480  |
| Cl | 3.181841  | 0.428122  | -0.294549 |
| Cl | 0.879577  | -1.001515 | 2.192764  |



## 6.1 Isomers of the pre-catalyst

SolvatedPre-catalyst  
SCF Energy: -2691.68255479  
ZPE-corrected Energy: -2691.44724  
 $\Delta U$ : -2691.42718  
 $\Delta H$ : -2691.42623  
 $\Delta G$ : -2691.49528  
 $S^2$  before (1.0002) and after higher multiplicity projection (0.0114)  
Num. Imaginary Frequencies: 0

|    |           |           |           |
|----|-----------|-----------|-----------|
| N  | 0.227688  | 1.353324  | -0.177337 |
| C  | -0.063560 | 2.651997  | -0.157291 |
| C  | 0.917775  | 3.627411  | -0.008102 |
| C  | 2.240251  | 3.216243  | 0.126388  |
| C  | 2.538211  | 1.856556  | 0.109648  |
| C  | 1.499751  | 0.937919  | -0.041359 |
| H  | -1.124707 | 2.912124  | -0.262902 |
| H  | 0.644140  | 4.686319  | 0.005722  |
| H  | 3.042825  | 3.950877  | 0.248494  |
| H  | 3.573680  | 1.522738  | 0.218648  |
| C  | 1.697488  | -0.529533 | -0.054181 |
| N  | 0.584525  | -1.266355 | -0.227622 |
| C  | 0.655648  | -2.594815 | -0.217188 |
| C  | 1.856508  | -3.277280 | -0.056442 |
| C  | 3.018648  | -2.529790 | 0.108070  |
| C  | 2.940487  | -1.140367 | 0.112341  |
| Ni | -1.154417 | -0.157912 | -0.211055 |
| H  | -0.291575 | -3.134768 | -0.336016 |
| H  | 1.873870  | -4.370842 | -0.055852 |
| H  | 3.986103  | -3.024797 | 0.240931  |
| H  | 3.845149  | -0.542941 | 0.254044  |
| O  | -1.297522 | -0.124737 | -2.315995 |
| H  | -1.800436 | 0.633966  | -2.663326 |
| H  | -0.457683 | -0.147547 | -2.807900 |
| O  | -2.829258 | 1.160108  | -0.158584 |
| H  | -3.625966 | 0.653176  | -0.404682 |
| H  | -2.832121 | 1.173956  | 0.828621  |
| O  | -2.613321 | -1.677703 | -0.214225 |
| Cl | -1.456751 | -0.251101 | 2.087543  |
| H  | -2.668249 | -2.477433 | -0.764987 |
| H  | -2.648519 | -1.924759 | 0.734331  |

## 6.2 Ni/B mechanism

A.3

SCF Energy: -3022.63183798

ZPE-corrected Energy: -3022.30595

 $\Delta U$ : -3022.27991 $\Delta H$ : -3022.27896 $\Delta G$ : -3022.36720 $S^2$  before (2.0073) and after higher multiplicity projection (2.0000)

Num. Imaginary Frequencies: 0

|    |           |           |           |
|----|-----------|-----------|-----------|
| N  | 1.478088  | 1.634776  | 0.412550  |
| C  | 0.862992  | 2.782898  | 0.679959  |
| C  | 1.500840  | 4.009611  | 0.519785  |
| C  | 2.812596  | 4.014895  | 0.054388  |
| C  | 3.440421  | 2.808631  | -0.245695 |
| C  | 2.735049  | 1.620502  | -0.057694 |
| H  | -0.176194 | 2.703796  | 1.021914  |
| H  | 0.973069  | 4.939446  | 0.750776  |
| H  | 3.348093  | 4.959549  | -0.087691 |
| H  | 4.462458  | 2.801894  | -0.635191 |
| C  | 3.262149  | 0.276551  | -0.382353 |
| N  | 2.380305  | -0.736508 | -0.257617 |
| C  | 2.745099  | -1.980314 | -0.571774 |
| C  | 4.028355  | -2.282374 | -1.020041 |
| C  | 4.953568  | -1.251395 | -1.133966 |
| C  | 4.566431  | 0.047257  | -0.814831 |
| Ni | 0.588934  | -0.186080 | 0.571100  |
| H  | 1.979637  | -2.760419 | -0.485829 |
| H  | 4.285838  | -3.314884 | -1.272769 |
| H  | 5.974797  | -1.451415 | -1.475012 |
| H  | 5.279312  | 0.872170  | -0.901942 |
| O  | -0.072288 | -3.494122 | -0.588365 |
| H  | 0.143384  | -3.100009 | 0.285563  |
| H  | -0.907661 | -3.967752 | -0.368102 |
| O  | -0.943874 | 0.397090  | -0.308639 |
| B  | -2.049011 | -0.273818 | -0.639763 |
| O  | -2.505575 | -3.657545 | 0.711797  |
| Cl | 0.175166  | -1.840259 | 2.055378  |
| O  | -2.064637 | -1.588367 | -1.072440 |
| C  | -3.468734 | 0.423498  | -0.550101 |
| H  | -1.180377 | -2.019599 | -1.094120 |
| C  | -4.655702 | -0.273747 | -0.821160 |
| C  | -5.901896 | 0.343243  | -0.719240 |
| C  | -5.985704 | 1.684702  | -0.345411 |
| C  | -4.818983 | 2.400516  | -0.074030 |
| C  | -3.580092 | 1.770311  | -0.174950 |
| H  | -4.597518 | -1.328683 | -1.119784 |
| H  | -6.816185 | -0.224097 | -0.933226 |
| H  | -6.964185 | 2.174307  | -0.265042 |
| H  | -4.880291 | 3.456096  | 0.219515  |
| H  | -2.660649 | 2.331489  | 0.039466  |
| H  | -2.044892 | -3.179828 | 1.426001  |
| H  | -2.737645 | -2.941379 | 0.081405  |

Allenamide

SCF Energy: -440.745600425

ZPE-corrected Energy: -440.570139

 $\Delta U$ : -440.560440 $\Delta H$ : -440.559496 $\Delta G$ : -440.605314

Num. Imaginary Frequencies: 0

|   |           |           |           |
|---|-----------|-----------|-----------|
| C | 0.133418  | -0.881568 | -0.053652 |
| N | -0.063563 | 0.485386  | -0.034677 |
| O | -0.802780 | -1.654592 | -0.078265 |
| C | 1.008154  | 1.478000  | 0.080016  |
| C | -1.370050 | 1.007520  | 0.019221  |
| C | 2.362019  | 0.933180  | -0.315083 |
| H | 0.741993  | 2.342729  | -0.556284 |
| H | 1.043978  | 1.850721  | 1.126416  |
| C | 2.607582  | -0.389426 | 0.384187  |
| H | 2.404168  | 0.785479  | -1.413705 |
| H | 3.132370  | 1.684321  | -0.062266 |
| C | 1.561826  | -1.382001 | -0.086165 |
| H | 3.623563  | -0.773525 | 0.180426  |
| H | 2.536144  | -0.246864 | 1.482193  |
| H | 1.761669  | -1.671076 | -1.138867 |
| H | 1.572055  | -2.324797 | 0.488590  |
| C | -2.533533 | 0.390263  | 0.030723  |
| H | -1.381043 | 2.107322  | 0.054198  |
| C | -3.763413 | -0.052261 | 0.042942  |
| H | -4.321760 | -0.239123 | -0.888012 |
| H | -4.281973 | -0.298388 | 0.983034  |

## 6.2 Ni/B mechanism

A

SCF Energy: -3022.6365617  
 ZPE-corrected Energy: -3022.30973  
 $\Delta U$ : -3022.28439  
 $\Delta H$ : -3022.28344  
 $\Delta G$ : -3022.36719

$S^2$  before (0.1694) and after higher multiplicity projection (0.0005)

Num. Imaginary Frequencies: 0

|    |           |           |           |
|----|-----------|-----------|-----------|
| N  | -1.021795 | 1.522789  | -0.035862 |
| C  | -0.090775 | 2.472285  | 0.072196  |
| C  | -0.409782 | 3.767843  | 0.467879  |
| C  | -1.735561 | 4.073545  | 0.756158  |
| C  | -2.704200 | 3.081046  | 0.632928  |
| C  | -2.313308 | 1.807789  | 0.228591  |
| H  | 0.928831  | 2.153918  | -0.175667 |
| H  | 0.380201  | 4.520286  | 0.546553  |
| H  | -2.020298 | 5.082263  | 1.073106  |
| H  | -3.754042 | 3.300712  | 0.847113  |
| C  | -3.225695 | 0.673436  | 0.031429  |
| N  | -2.622415 | -0.455144 | -0.405561 |
| C  | -3.361036 | -1.544213 | -0.635902 |
| C  | -4.737807 | -1.564429 | -0.436755 |
| C  | -5.365578 | -0.410910 | 0.018888  |
| C  | -4.598522 | 0.726039  | 0.254711  |
| Ni | -0.676192 | -0.305277 | -0.565575 |
| H  | -2.807230 | -2.421825 | -0.990817 |
| H  | -5.300107 | -2.480781 | -0.638030 |
| H  | -6.446697 | -0.391353 | 0.190993  |
| H  | -5.067641 | 1.646890  | 0.612832  |
| O  | -0.643320 | -2.302755 | 1.985097  |
| H  | -0.947604 | -2.403057 | 1.061833  |
| H  | 0.043631  | -3.010961 | 2.031592  |
| O  | 1.108364  | 0.041629  | -0.652027 |
| B  | 2.030807  | -0.305266 | 0.246549  |
| O  | 1.560867  | -3.759736 | 1.173454  |
| Cl | -0.369916 | -2.411559 | -1.194476 |
| O  | 1.788778  | -0.977658 | 1.431978  |
| C  | 3.534284  | 0.128592  | 0.001844  |
| H  | 0.842234  | -1.193271 | 1.602394  |
| C  | 4.544618  | -0.140068 | 0.937240  |
| C  | 5.862411  | 0.259373  | 0.718270  |
| C  | 6.197116  | 0.943979  | -0.450483 |
| C  | 5.208500  | 1.224878  | -1.394443 |
| C  | 3.894790  | 0.818849  | -1.165041 |
| H  | 4.284755  | -0.675198 | 1.859716  |
| H  | 6.636538  | 0.036434  | 1.463155  |
| H  | 7.233098  | 1.259021  | -0.627001 |
| H  | 5.467695  | 1.760742  | -2.316272 |
| H  | 3.115240  | 1.032397  | -1.908268 |
| H  | 1.198939  | -3.593131 | 0.280700  |
| H  | 2.075611  | -2.946070 | 1.352404  |

Boronic

SCF Energy: -328.50006412  
 ZPE-corrected Energy: -328.427816  
 $\Delta U$ : -328.421101  
 $\Delta H$ : -328.420157  
 $\Delta G$ : -328.457940

Num. Imaginary Frequencies: 1

Imaginary Frequency: -267.6752

|   |           |           |           |
|---|-----------|-----------|-----------|
| B | 0.745197  | -0.023908 | -0.000458 |
| O | 0.082322  | -1.200661 | -0.000983 |
| O | 0.057513  | 1.173432  | -0.000891 |
| H | -0.894376 | -1.072592 | -0.001302 |
| O | 2.111368  | 0.022413  | 0.001161  |
| H | 2.487118  | -0.870355 | 0.001307  |
| H | 0.664463  | 1.928415  | -0.000810 |
| O | -2.349401 | -0.084301 | 0.000957  |
| H | -3.304620 | 0.067809  | 0.000393  |
| H | -1.892981 | 0.779206  | 0.000752  |

C.3

SCF Energy: -2694.11056465  
 ZPE-corrected Energy: -2693.86085  
 $\Delta U$ : -2693.84300  
 $\Delta H$ : -2693.84206  
 $\Delta G$ : -2693.91026

$S^2$  before (2.0110) and after higher multiplicity projection (2.0001)

Num. Imaginary Frequencies: 0

|    |           |           |           |
|----|-----------|-----------|-----------|
| N  | 1.642365  | -0.983110 | 0.410149  |
| C  | 2.160382  | -2.180670 | 0.665633  |
| C  | 3.513965  | -2.359267 | 0.935860  |
| C  | 4.342580  | -1.240629 | 0.917417  |
| C  | 3.800846  | 0.006374  | 0.619525  |
| C  | 2.431943  | 0.100905  | 0.364016  |
| H  | 1.459401  | -3.024190 | 0.631769  |
| H  | 3.907120  | -3.357805 | 1.148799  |
| H  | 5.414380  | -1.337965 | 1.120716  |
| H  | 4.445509  | 0.888997  | 0.573254  |
| C  | 1.747410  | 1.358424  | -0.012916 |
| N  | 0.448751  | 1.227714  | -0.339802 |
| C  | -0.252828 | 2.286849  | -0.738885 |
| C  | 0.311175  | 3.556213  | -0.830810 |
| C  | 1.648664  | 3.711183  | -0.479231 |
| C  | 2.378862  | 2.601112  | -0.064317 |
| Ni | -0.364385 | -0.646280 | -0.099683 |
| H  | -1.305942 | 2.098656  | -0.984763 |
| H  | -0.293300 | 4.403109  | -1.168679 |
| H  | 2.127603  | 4.694918  | -0.528273 |
| H  | 3.431060  | 2.708002  | 0.215304  |
| C  | -2.259884 | -0.301788 | 0.271387  |
| Cl | -0.257652 | -2.034532 | -1.858498 |
| C  | -3.274955 | -1.112499 | -0.265883 |
| C  | -4.621870 | -0.907734 | 0.037498  |
| C  | -4.999174 | 0.124770  | 0.897867  |
| C  | -4.016993 | 0.946712  | 1.448224  |
| C  | -2.672191 | 0.731418  | 1.132441  |
| H  | -2.997687 | -1.926436 | -0.951025 |
| H  | -5.388508 | -1.558576 | -0.403774 |
| H  | -6.057466 | 0.289098  | 1.137004  |
| H  | -4.299649 | 1.762046  | 2.127710  |
| H  | -1.925069 | 1.402550  | 1.588150  |

## 6.2 Ni/B mechanism

C  
 SCF Energy: -2694.13063104  
 ZPE-corrected Energy: -2693.87946  
 $\Delta U$ : -2693.86242  
 $\Delta H$ : -2693.86148  
 $\Delta G$ : -2693.92593  
 Num. Imaginary Frequencies: 0

|    |           |           |           |
|----|-----------|-----------|-----------|
| N  | 1.805755  | -0.833963 | -0.011957 |
| C  | 2.516577  | -1.961063 | 0.019821  |
| C  | 3.905798  | -1.958758 | 0.108832  |
| C  | 4.568305  | -0.736806 | 0.171149  |
| C  | 3.825009  | 0.439163  | 0.135887  |
| C  | 2.436322  | 0.354003  | 0.040614  |
| H  | 1.919412  | -2.881979 | -0.028254 |
| H  | 4.453067  | -2.906066 | 0.130946  |
| H  | 5.660157  | -0.694640 | 0.246664  |
| H  | 4.327064  | 1.409764  | 0.184264  |
| C  | 1.535459  | 1.514850  | -0.026366 |
| N  | 0.215703  | 1.209944  | -0.084150 |
| C  | -0.666700 | 2.212542  | -0.191441 |
| C  | -0.288006 | 3.550001  | -0.228571 |
| C  | 1.063126  | 3.868234  | -0.151408 |
| C  | 1.985901  | 2.833441  | -0.052099 |
| Ni | -0.189737 | -0.683285 | -0.045600 |
| H  | -1.721679 | 1.923166  | -0.246271 |
| H  | -1.055248 | 4.324905  | -0.317175 |
| H  | 1.399604  | 4.909982  | -0.174245 |
| H  | 3.056347  | 3.051996  | -0.001974 |
| C  | -2.040345 | -0.424418 | 0.036498  |
| Cl | -0.537485 | -2.820260 | -0.105203 |
| C  | -2.871598 | -0.563956 | -1.081959 |
| C  | -4.234212 | -0.266425 | -1.010383 |
| C  | -4.801352 | 0.152131  | 0.194309  |
| C  | -3.992798 | 0.265516  | 1.325220  |
| C  | -2.627325 | -0.019877 | 1.243037  |
| H  | -2.450925 | -0.920570 | -2.032701 |
| H  | -4.863680 | -0.373097 | -1.903697 |
| H  | -5.872885 | 0.379609  | 0.253343  |
| H  | -4.429194 | 0.579673  | 2.282619  |
| H  | -2.007324 | 0.090324  | 2.145644  |

D1  
 SCF Energy: -3134.90077995  
 ZPE-corrected Energy: -3134.47125  
 $\Delta U$ : -3134.44409  
 $\Delta H$ : -3134.44315  
 $\Delta G$ : -3134.52778  
 Num. Imaginary Frequencies: 0

|    |           |           |           |
|----|-----------|-----------|-----------|
| Ni | -0.829995 | -0.480239 | -0.466125 |
| N  | 1.034088  | -0.545100 | -1.252417 |
| C  | 1.617262  | -1.663265 | -1.677954 |
| C  | 2.907931  | -1.676718 | -2.195638 |
| C  | 3.597119  | -0.469423 | -2.285701 |
| C  | 2.968049  | 0.701714  | -1.879961 |
| C  | 1.668463  | 0.632419  | -1.368072 |
| C  | 0.865616  | 1.816674  | -1.008124 |
| H  | 1.011993  | -2.575328 | -1.604777 |
| H  | 3.355038  | -2.617161 | -2.531378 |
| H  | 4.613337  | -0.435273 | -2.693192 |
| H  | 3.474930  | 1.665112  | -1.987319 |
| N  | -0.434622 | 1.571412  | -0.766535 |
| C  | -1.255668 | 2.595594  | -0.556569 |
| C  | -0.819672 | 3.917741  | -0.522590 |
| C  | 0.533294  | 4.174736  | -0.712171 |
| C  | 1.388467  | 3.109675  | -0.972548 |
| H  | -2.311671 | 2.344482  | -0.400818 |
| H  | -1.535788 | 4.725128  | -0.342257 |
| H  | 0.921971  | 5.197870  | -0.671184 |
| H  | 2.454526  | 3.288388  | -1.143233 |
| Cl | -1.540150 | -1.224599 | -2.529151 |
| C  | -2.594212 | -0.301477 | 0.258026  |
| C  | -2.811199 | 0.616694  | 1.294923  |
| C  | -4.089185 | 0.813341  | 1.828580  |
| C  | -5.170086 | 0.079252  | 1.347145  |
| C  | -4.958947 | -0.852740 | 0.330875  |
| C  | -3.685145 | -1.043730 | -0.206628 |
| H  | -1.975455 | 1.199443  | 1.708246  |
| H  | -4.231677 | 1.544601  | 2.634793  |
| H  | -6.172907 | 0.227109  | 1.766232  |
| H  | -5.800030 | -1.443289 | -0.054926 |
| H  | -3.536023 | -1.767708 | -1.015389 |
| C  | -0.137751 | -0.958599 | 1.410290  |
| C  | -0.612035 | -2.017521 | 0.650641  |
| C  | -0.874816 | -3.288755 | 0.410693  |
| H  | -1.324535 | -3.589010 | -0.547389 |
| H  | -0.675462 | -4.070630 | 1.160665  |
| N  | 1.235202  | -0.714569 | 1.669465  |
| C  | 1.560858  | 0.558998  | 2.086171  |
| C  | 3.014336  | 0.842752  | 2.396320  |
| C  | 3.862410  | -0.377429 | 2.702791  |
| C  | 3.606295  | -1.429708 | 1.640992  |
| C  | 2.154351  | -1.852108 | 1.672492  |
| O  | 0.722072  | 1.440549  | 2.157350  |
| H  | 3.414591  | 1.366463  | 1.501559  |
| H  | 3.023884  | 1.590870  | 3.208583  |
| H  | 3.594918  | -0.786997 | 3.698489  |
| H  | 4.931529  | -0.101638 | 2.752004  |
| H  | 4.239298  | -2.323982 | 1.788086  |
| H  | 3.856023  | -1.020074 | 0.639054  |
| H  | 1.954578  | -2.468990 | 2.575768  |
| H  | 1.916563  | -2.490862 | 0.802865  |
| H  | -0.810889 | -0.468953 | 2.126280  |

## 6.2 Ni/B mechanism

D  
 SCF Energy: -3134.90006342  
 ZPE-corrected Energy: -3134.47044  
 $\Delta U$ : -3134.44320  
 $\Delta H$ : -3134.44226  
 $\Delta G$ : -3134.52779  
 Num. Imaginary Frequencies: 0

|    |           |           |           |
|----|-----------|-----------|-----------|
| N  | -2.246694 | -0.637136 | -0.614444 |
| C  | -2.785908 | -1.564641 | -1.402186 |
| C  | -3.980573 | -1.355652 | -2.082780 |
| C  | -4.626388 | -0.132470 | -1.925439 |
| C  | -4.079566 | 0.817660  | -1.070742 |
| C  | -2.882621 | 0.529339  | -0.411180 |
| H  | -2.231790 | -2.508033 | -1.477098 |
| H  | -4.392195 | -2.141981 | -2.722489 |
| H  | -5.563907 | 0.076818  | -2.451658 |
| H  | -4.591106 | 1.770512  | -0.908603 |
| C  | -2.281808 | 1.396751  | 0.619111  |
| N  | -1.204878 | 0.883241  | 1.240587  |
| C  | -0.714513 | 1.509903  | 2.307252  |
| C  | -1.229415 | 2.715152  | 2.777186  |
| C  | -2.295579 | 3.290426  | 2.094576  |
| C  | -2.839005 | 2.615762  | 1.007472  |
| Ni | -0.440667 | -0.818629 | 0.276531  |
| H  | 0.131576  | 1.022796  | 2.806495  |
| H  | -0.791966 | 3.189314  | 3.661011  |
| H  | -2.717447 | 4.248683  | 2.416106  |
| H  | -3.698933 | 3.032642  | 0.475347  |
| O  | 0.442791  | 2.285459  | -1.421780 |
| C  | 1.256177  | -0.845229 | 1.143906  |
| Cl | -1.325032 | -2.511428 | 1.563872  |
| C  | 1.837021  | -2.013430 | 1.649946  |
| C  | 3.090262  | -1.983753 | 2.263643  |
| C  | 3.787723  | -0.782557 | 2.397427  |
| C  | 3.215664  | 0.389874  | 1.908691  |
| C  | 1.966916  | 0.353617  | 1.278984  |
| H  | 1.288644  | -2.959378 | 1.578572  |
| H  | 3.523974  | -2.915203 | 2.649772  |
| H  | 4.769419  | -0.760580 | 2.886035  |
| H  | 3.743649  | 1.347547  | 2.012774  |
| H  | 1.552562  | 1.293944  | 0.889840  |
| C  | 1.515761  | 1.740035  | -1.617522 |
| C  | 2.781867  | 2.546191  | -1.802201 |
| C  | 4.073961  | 1.771748  | -1.615234 |
| H  | 2.733588  | 2.962811  | -2.830132 |
| H  | 2.698055  | 3.415989  | -1.125885 |
| C  | 3.984419  | 0.479587  | -2.403666 |
| H  | 4.937010  | 2.383520  | -1.935705 |
| H  | 4.227425  | 1.535070  | -0.542734 |
| C  | 2.863161  | -0.380259 | -1.860711 |
| H  | 3.803409  | 0.709494  | -3.474258 |
| H  | 4.926027  | -0.097029 | -2.353698 |
| N  | 1.613564  | 0.367158  | -1.709378 |
| H  | 2.662155  | -1.233311 | -2.534626 |
| H  | 3.148679  | -0.809966 | -0.878048 |
| C  | 0.412159  | -0.351282 | -1.565487 |
| C  | 0.347467  | -1.695688 | -1.234711 |
| H  | -0.434196 | 0.137370  | -2.069559 |
| C  | 0.482477  | -2.982996 | -1.495451 |
| H  | 0.235929  | -3.732505 | -0.729461 |
| H  | 0.829418  | -3.337682 | -2.479118 |

E1  
 SCF Energy: -3134.96271929  
 ZPE-corrected Energy: -3134.53095  
 $\Delta U$ : -3134.50417  
 $\Delta H$ : -3134.50323  
 $\Delta G$ : -3134.58901  
 Num. Imaginary Frequencies: 0

|    |           |           |           |
|----|-----------|-----------|-----------|
| Ni | -0.449482 | -0.422800 | 0.813892  |
| N  | -0.096369 | -1.849634 | -0.498998 |
| C  | -1.093088 | -2.444908 | -1.149894 |
| C  | -0.875416 | -3.483922 | -2.048062 |
| C  | 0.432431  | -3.915323 | -2.251478 |
| C  | 1.466190  | -3.302195 | -1.552340 |
| C  | 1.169330  | -2.259047 | -0.673403 |
| H  | -2.103479 | -2.076327 | -0.928299 |
| H  | -1.718927 | -3.945707 | -2.569939 |
| H  | 0.648642  | -4.734437 | -2.945852 |
| H  | 2.496697  | -3.644105 | -1.684647 |
| C  | 2.190233  | -1.552686 | 0.133026  |
| N  | 1.712557  | -0.701632 | 1.049218  |
| C  | 2.553567  | -0.014480 | 1.811791  |
| C  | 3.937331  | -0.135495 | 1.707458  |
| C  | 4.445931  | -1.016963 | 0.755739  |
| C  | 3.564405  | -1.737751 | -0.041824 |
| H  | 2.099947  | 0.663652  | 2.549601  |
| H  | 4.597050  | 0.444675  | 2.360659  |
| H  | 5.527302  | -1.142666 | 0.632447  |
| H  | 3.948693  | -2.421434 | -0.804445 |
| Cl | -1.248840 | -1.896055 | 2.321548  |
| C  | -1.468737 | 1.192488  | 0.477131  |
| C  | -1.010148 | 1.156916  | 1.823661  |
| C  | -0.437226 | 1.104629  | -0.504864 |
| H  | -1.742459 | 1.039163  | 2.633259  |
| H  | -0.078402 | 1.666856  | 2.116250  |
| N  | 0.724402  | 1.940335  | -0.497157 |
| H  | -0.728783 | 0.781534  | -1.519062 |
| C  | 0.565492  | 3.336790  | -0.075565 |
| C  | 1.893138  | 4.018208  | 0.166868  |
| C  | 2.774965  | 3.878036  | -1.058363 |
| C  | 3.010119  | 2.403926  | -1.330963 |
| C  | 1.778965  | 1.523387  | -1.277188 |
| O  | 1.760389  | 0.451465  | -1.859701 |
| H  | -0.049963 | 3.362028  | 0.837557  |
| H  | -0.008571 | 3.886772  | -0.855125 |
| H  | 1.710982  | 5.078742  | 0.420689  |
| H  | 2.391449  | 3.556149  | 1.045371  |
| H  | 2.268716  | 4.348754  | -1.926159 |
| H  | 3.737691  | 4.406206  | -0.930791 |
| H  | 3.703041  | 1.984754  | -0.570193 |
| H  | 3.488465  | 2.218579  | -2.308569 |
| C  | -2.889598 | 1.022538  | 0.088100  |
| C  | -3.394626 | 1.752517  | -0.995884 |
| C  | -4.731605 | 1.637917  | -1.374637 |
| C  | -5.583849 | 0.788544  | -0.672451 |
| C  | -5.088140 | 0.051279  | 0.404938  |
| C  | -3.753894 | 0.163017  | 0.784859  |
| H  | -2.726549 | 2.434022  | -1.539084 |
| H  | -5.109791 | 2.220722  | -2.222983 |
| H  | -6.635722 | 0.695347  | -0.967458 |
| H  | -5.749475 | -0.631589 | 0.951497  |
| H  | -3.352631 | -0.460071 | 1.596202  |

## 6.2 Ni/B mechanism

EnamideE  
 SCF Energy: -672.691073334  
 ZPE-corrected Energy: -672.410745  
 $\Delta U$ : -672.396312  
 $\Delta H$ : -672.395368  
 $\Delta G$ : -672.452781

Num. Imaginary Frequencies: 0

|   |           |           |           |
|---|-----------|-----------|-----------|
| C | -0.722903 | -0.295563 | 0.406939  |
| C | -0.379627 | -1.457415 | 1.284862  |
| C | 0.221627  | 0.470942  | -0.168845 |
| N | 1.617849  | 0.303334  | -0.029702 |
| H | -0.061192 | 1.322955  | -0.807401 |
| C | 2.337721  | 1.554392  | 0.221333  |
| C | 3.781787  | 1.339574  | 0.616850  |
| C | 4.450160  | 0.398737  | -0.366184 |
| C | 3.733102  | -0.937898 | -0.323737 |
| C | 2.225971  | -0.865070 | -0.459409 |
| O | 1.590537  | -1.810729 | -0.880853 |
| H | 1.795342  | 2.099415  | 1.016180  |
| H | 2.286188  | 2.190000  | -0.691359 |
| H | 4.289576  | 2.320622  | 0.659489  |
| H | 3.830608  | 0.906655  | 1.636928  |
| H | 4.394079  | 0.829282  | -1.387285 |
| H | 5.523532  | 0.268601  | -0.136513 |
| H | 3.931725  | -1.438042 | 0.647310  |
| H | 4.080865  | -1.638438 | -1.102511 |
| C | -2.154704 | -0.019779 | 0.148541  |
| C | -3.079902 | -1.074264 | 0.104883  |
| C | -4.429402 | -0.838519 | -0.148249 |
| C | -4.889662 | 0.461018  | -0.350748 |
| C | -3.986044 | 1.522378  | -0.293991 |
| C | -2.637968 | 1.284425  | -0.044838 |
| H | -2.733054 | -2.103813 | 0.253165  |
| H | -5.128477 | -1.682206 | -0.188109 |
| H | -5.952197 | 0.648477  | -0.544071 |
| H | -4.337853 | 2.551472  | -0.433485 |
| H | -1.947784 | 2.133617  | 0.028362  |
| H | -0.326601 | -2.397723 | 0.703127  |
| H | 0.613368  | -1.320322 | 1.748334  |
| H | -1.128305 | -1.585814 | 2.088131  |

EnamideZ  
 SCF Energy: -672.691818573  
 ZPE-corrected Energy: -672.411701  
 $\Delta U$ : -672.397169  
 $\Delta H$ : -672.396225  
 $\Delta G$ : -672.454156

Num. Imaginary Frequencies: 0

|   |           |           |           |
|---|-----------|-----------|-----------|
| C | 0.926707  | 1.666326  | -0.197210 |
| C | 1.721069  | 2.926322  | -0.358543 |
| C | -0.415193 | 1.694444  | -0.267493 |
| N | -1.247657 | 0.546227  | -0.259695 |
| H | -0.943547 | 2.655930  | -0.346049 |
| C | -1.085810 | -0.424174 | -1.345730 |
| C | -1.808786 | -1.721846 | -1.062013 |
| C | -3.246270 | -1.435491 | -0.671815 |
| C | -3.252522 | -0.616054 | 0.605326  |
| C | -2.299885 | 0.559647  | 0.626609  |
| O | -2.426476 | 1.459720  | 1.437880  |
| H | -0.006201 | -0.610425 | -1.490280 |
| H | -1.464726 | 0.023352  | -2.290498 |
| H | -1.746901 | -2.368811 | -1.956273 |
| H | -1.295075 | -2.259008 | -0.237136 |
| H | -3.742844 | -0.873799 | -1.489823 |
| H | -3.823973 | -2.367786 | -0.533965 |
| H | -2.957609 | -1.254408 | 1.464216  |
| H | -4.251192 | -0.218976 | 0.860133  |
| C | 1.678528  | 0.415272  | 0.061074  |
| C | 2.789963  | 0.061063  | -0.715998 |
| C | 3.485864  | -1.121613 | -0.470807 |
| C | 3.090813  | -1.964027 | 0.566858  |
| C | 1.999273  | -1.612369 | 1.362031  |
| C | 1.301075  | -0.434062 | 1.112887  |
| H | 3.106884  | 0.713687  | -1.539170 |
| H | 4.345979  | -1.386372 | -1.096980 |
| H | 3.639825  | -2.892354 | 0.762858  |
| H | 1.694846  | -2.259536 | 2.193114  |
| H | 0.455895  | -0.147940 | 1.751541  |
| H | 2.356858  | 2.897722  | -1.265612 |
| H | 1.063871  | 3.810055  | -0.441892 |
| H | 2.404367  | 3.076675  | 0.499594  |

## 6.2 Ni/B mechanism

E  
 SCF Energy: -3134.95501756  
 ZPE-corrected Energy: -3134.52310  
 $\Delta U$ : -3134.49639  
 $\Delta H$ : -3134.49545  
 $\Delta G$ : -3134.58187  
 Num. Imaginary Frequencies: 0

|    |           |           |           |
|----|-----------|-----------|-----------|
| Ni | 0.274741  | -1.232098 | -0.140669 |
| N  | 2.378304  | -1.082857 | -0.749026 |
| C  | 2.962987  | -1.551722 | -1.845505 |
| C  | 4.233313  | -1.153758 | -2.254044 |
| C  | 4.907691  | -0.217024 | -1.475194 |
| C  | 4.298471  | 0.271814  | -0.325249 |
| C  | 3.023882  | -0.189950 | 0.013165  |
| H  | 2.390527  | -2.288914 | -2.426283 |
| H  | 4.679302  | -1.570109 | -3.162850 |
| H  | 5.904875  | 0.134743  | -1.761726 |
| H  | 4.809252  | 1.017865  | 0.290586  |
| C  | 2.301326  | 0.252334  | 1.224872  |
| N  | 1.027448  | -0.156381 | 1.329281  |
| C  | 0.315476  | 0.146069  | 2.413923  |
| C  | 0.822026  | 0.934618  | 3.440599  |
| C  | 2.134103  | 1.389816  | 3.335631  |
| C  | 2.887409  | 1.030453  | 2.225130  |
| H  | -0.690938 | -0.288295 | 2.461901  |
| H  | 0.200907  | 1.170619  | 4.310044  |
| H  | 2.576908  | 2.006753  | 4.125149  |
| H  | 3.930195  | 1.349475  | 2.142893  |
| Cl | 0.063678  | -3.013563 | 1.201237  |
| C  | -1.317466 | -0.899991 | -1.226706 |
| C  | -0.657782 | -2.095955 | -1.630032 |
| C  | -0.457696 | 0.229012  | -1.363598 |
| H  | -1.114563 | -3.067137 | -1.403177 |
| H  | 0.004065  | -2.074171 | -2.511556 |
| N  | -0.861686 | 1.553207  | -1.002916 |
| H  | 0.275968  | 0.199347  | -2.189640 |
| C  | -2.105732 | 2.049104  | -1.615087 |
| C  | -2.619681 | 3.302448  | -0.943984 |
| C  | -1.536766 | 4.363605  | -0.936120 |
| C  | -0.318151 | 3.825490  | -0.208097 |
| C  | 0.125619  | 2.437236  | -0.623239 |
| O  | 1.297123  | 2.111542  | -0.544787 |
| H  | -2.863533 | 1.251314  | -1.563313 |
| H  | -1.920715 | 2.244930  | -2.694847 |
| H  | -3.524749 | 3.649290  | -1.476039 |
| H  | -2.927537 | 3.063390  | 0.095617  |
| H  | -1.268421 | 4.618289  | -1.981988 |
| H  | -1.886339 | 5.299936  | -0.463509 |
| H  | -0.536571 | 3.752690  | 0.879014  |
| H  | 0.562600  | 4.483753  | -0.302216 |
| C  | -2.604253 | -0.955181 | -0.490234 |
| C  | -3.584767 | -1.871478 | -0.890904 |
| C  | -4.801497 | -1.963496 | -0.216470 |
| C  | -5.061747 | -1.139677 | 0.875302  |
| C  | -4.094820 | -0.219591 | 1.285288  |
| C  | -2.882513 | -0.128792 | 0.611015  |
| H  | -3.392306 | -2.517634 | -1.755492 |
| H  | -5.552990 | -2.688407 | -0.550468 |
| H  | -6.016314 | -1.212797 | 1.409064  |
| H  | -4.287072 | 0.431675  | 2.146344  |
| H  | -2.129864 | 0.600300  | 0.934350  |

PhBoronic  
 SCF Energy: -560.344941699  
 ZPE-corrected Energy: -560.170986  
 $\Delta U$ : -560.157777  
 $\Delta H$ : -560.156833  
 $\Delta G$ : -560.211978  
 Num. Imaginary Frequencies: 0

|   |           |           |           |
|---|-----------|-----------|-----------|
| B | -0.561162 | -0.147135 | -0.116041 |
| O | -1.167593 | -1.290791 | 0.223092  |
| O | -1.320339 | 0.941199  | -0.536926 |
| H | -2.157832 | -1.321595 | 0.080489  |
| C | 1.005062  | -0.038005 | -0.042325 |
| H | -0.777344 | 1.663099  | -0.887939 |
| O | -3.803543 | -1.258725 | -0.168404 |
| H | -4.040219 | -1.334460 | -1.106117 |
| H | -4.033576 | -0.328071 | 0.095035  |
| O | -3.863598 | 1.358389  | 0.440105  |
| H | -2.948228 | 1.396257  | 0.076408  |
| H | -3.775850 | 1.528680  | 1.391535  |
| C | 1.681233  | 1.191040  | -0.061438 |
| C | 3.071532  | 1.260410  | 0.005795  |
| C | 3.818615  | 0.086311  | 0.090826  |
| C | 3.169533  | -1.148604 | 0.115465  |
| C | 1.779224  | -1.204965 | 0.054093  |
| H | 1.117313  | 2.134663  | -0.110550 |
| H | 3.575149  | 2.234230  | -0.004411 |
| H | 4.912929  | 0.134023  | 0.141855  |
| H | 3.754464  | -2.073455 | 0.185569  |
| H | 1.268382  | -2.175399 | 0.080909  |

Pre-catalyst  
 SCF Energy: -3075.60141207  
 ZPE-corrected Energy: -3075.38971  
 $\Delta U$ : -3075.37084  
 $\Delta H$ : -3075.36990  
 $\Delta G$ : -3075.43721  
 $S^2$  before (0.9953) and after higher multiplicity projection (0.0137)  
 Num. Imaginary Frequencies: 0

|    |           |           |           |
|----|-----------|-----------|-----------|
| N  | -0.976891 | -1.048339 | -0.259675 |
| C  | -1.337317 | -2.324739 | -0.322607 |
| C  | -2.671691 | -2.718619 | -0.288789 |
| C  | -3.646142 | -1.731237 | -0.172792 |
| C  | -3.259740 | -0.397007 | -0.091325 |
| C  | -1.900165 | -0.083296 | -0.135250 |
| H  | -0.519684 | -3.053706 | -0.399040 |
| H  | -2.935993 | -3.778719 | -0.346587 |
| H  | -4.707933 | -1.997459 | -0.137255 |
| H  | -4.014199 | 0.387704  | 0.015544  |
| C  | -1.369113 | 1.295154  | -0.033493 |
| N  | -0.029699 | 1.397702  | -0.006073 |
| C  | 0.555389  | 2.587559  | 0.093289  |
| C  | -0.182042 | 3.766539  | 0.171221  |
| C  | -1.570069 | 3.680891  | 0.142076  |
| C  | -2.175045 | 2.431411  | 0.038337  |
| Ni | 0.963367  | -0.389723 | -0.075465 |
| H  | 1.653779  | 2.574148  | 0.106032  |
| H  | 0.329499  | 4.730167  | 0.253617  |
| H  | -2.186416 | 4.584498  | 0.199931  |
| O  | -3.265572 | 2.349981  | 0.011189  |
| O  | 1.113909  | -0.296958 | -2.277448 |
| H  | 1.270198  | -1.218757 | -2.549331 |
| H  | 2.011809  | 0.099589  | -2.174769 |
| O  | 1.907124  | -2.343474 | -0.237105 |
| H  | 2.804569  | -1.948727 | -0.302791 |
| H  | 1.755038  | -2.430829 | 0.739480  |
| Cl | 3.181841  | 0.428122  | -0.294549 |
| Cl | 0.879577  | -1.001515 | 2.192764  |

## 6.2 Ni/B mechanism

TS AB.3  
 SCF Energy: -3022.59978125  
 ZPE-corrected Energy: -3022.27811  
 $\Delta U$ : -3022.25327  
 $\Delta H$ : -3022.25232  
 $\Delta G$ : -3022.33437  
 $S^2$  before (2.0072) and after higher multiplicity projection (2.0000)

Num. Imaginary Frequencies: 1

Imaginary Frequency: -1206.9196

|    |           |           |           |
|----|-----------|-----------|-----------|
| N  | 0.084002  | 1.443232  | -0.748711 |
| C  | 1.092152  | 2.315479  | -0.740139 |
| C  | 0.889197  | 3.665776  | -0.459389 |
| C  | -0.398917 | 4.100658  | -0.169782 |
| C  | -1.445561 | 3.181794  | -0.176277 |
| C  | -1.168408 | 1.848846  | -0.474686 |
| H  | 2.099512  | 1.920708  | -0.942451 |
| H  | 1.739335  | 4.354260  | -0.464459 |
| H  | -0.595044 | 5.152849  | 0.063395  |
| H  | -2.463878 | 3.507746  | 0.054174  |
| C  | -2.197764 | 0.784435  | -0.491799 |
| N  | -1.741890 | -0.449621 | -0.759152 |
| C  | -2.577522 | -1.485130 | -0.795720 |
| C  | -3.940951 | -1.340294 | -0.557002 |
| C  | -4.431020 | -0.068089 | -0.276924 |
| C  | -3.552752 | 1.011132  | -0.246229 |
| Ni | 0.324537  | -0.624560 | -0.919796 |
| H  | -2.110790 | -2.451075 | -1.035109 |
| H  | -4.601349 | -2.211751 | -0.595022 |
| H  | -5.498042 | 0.089004  | -0.085431 |
| H  | -3.926247 | 2.017036  | -0.034671 |
| O  | 2.254543  | -0.522299 | -0.647177 |
| B  | 2.399351  | -0.568602 | 0.787361  |
| Cl | 0.312369  | -2.655263 | -1.906451 |
| O  | 3.375330  | 0.326942  | 1.311986  |
| C  | 0.992477  | -0.657642 | 1.582283  |
| H  | 3.323761  | 0.391857  | 2.276138  |
| C  | 0.207994  | -1.826847 | 1.579296  |
| C  | -1.046824 | -1.865491 | 2.195213  |
| C  | -1.550226 | -0.732009 | 2.827200  |
| C  | -0.789564 | 0.441434  | 2.850703  |
| C  | 0.459548  | 0.470315  | 2.238072  |
| H  | 0.593654  | -2.727408 | 1.084697  |
| H  | -1.633331 | -2.792668 | 2.181028  |
| H  | -2.535390 | -0.759828 | 3.309099  |
| H  | -1.177189 | 1.337035  | 3.352719  |
| H  | 1.043663  | 1.402746  | 2.256611  |
| O  | 3.046591  | -2.108514 | 0.680265  |
| H  | 2.810155  | -1.711250 | -0.379657 |
| H  | 4.004303  | -2.057545 | 0.851396  |
| H  | 4.242074  | 1.316326  | -0.227416 |
| O  | 4.208216  | 1.315263  | -1.202812 |
| H  | 3.567359  | 0.579496  | -1.329875 |

TS AB  
 SCF Energy: -3022.60445685  
 ZPE-corrected Energy: -3022.28145  
 $\Delta U$ : -3022.25731  
 $\Delta H$ : -3022.25636  
 $\Delta G$ : -3022.33483  
 $S^2$  before (0.3367) and after higher multiplicity projection (0.0018)

Num. Imaginary Frequencies: 1

Imaginary Frequency: -1231.9181

|    |           |           |           |
|----|-----------|-----------|-----------|
| N  | 0.105604  | 1.241602  | -0.892027 |
| C  | 1.132356  | 2.088773  | -0.986059 |
| C  | 0.954594  | 3.463828  | -0.849264 |
| C  | -0.320993 | 3.956256  | -0.597112 |
| C  | -1.387581 | 3.065724  | -0.506032 |
| C  | -1.139635 | 1.705512  | -0.666415 |
| H  | 2.124968  | 1.652292  | -1.165458 |
| H  | 1.817909  | 4.129626  | -0.938155 |
| H  | -0.491888 | 5.031354  | -0.476649 |
| H  | -2.401009 | 3.431343  | -0.316793 |
| C  | -2.169821 | 0.657242  | -0.610153 |
| N  | -1.713331 | -0.586585 | -0.868085 |
| C  | -2.555555 | -1.621568 | -0.836678 |
| C  | -3.907510 | -1.463672 | -0.548648 |
| C  | -4.390360 | -0.186850 | -0.280855 |
| C  | -3.510613 | 0.890535  | -0.314216 |
| Ni | 0.240372  | -0.710769 | -0.947924 |
| H  | -2.099483 | -2.597545 | -1.046564 |
| H  | -4.565159 | -2.337814 | -0.533975 |
| H  | -5.447670 | -0.026320 | -0.044815 |
| H  | -3.865655 | 1.903202  | -0.102588 |
| O  | 2.076264  | -0.668503 | -0.608575 |
| B  | 2.327735  | -0.520972 | 0.828336  |
| Cl | 0.304651  | -2.874377 | -1.387872 |
| O  | 3.414763  | 0.364683  | 1.105092  |
| C  | 1.012202  | -0.349730 | 1.741419  |
| H  | 3.450692  | 0.601113  | 2.042590  |
| C  | 0.097338  | -1.400637 | 1.927863  |
| C  | -1.116966 | -1.201751 | 2.586090  |
| C  | -1.447564 | 0.059580  | 3.083192  |
| C  | -0.545454 | 1.113666  | 2.933111  |
| C  | 0.666428  | 0.902464  | 2.274384  |
| H  | 0.335272  | -2.394087 | 1.525617  |
| H  | -1.813756 | -2.040257 | 2.713369  |
| H  | -2.402849 | 0.218275  | 3.598919  |
| H  | -0.788676 | 2.107160  | 3.331429  |
| H  | 1.357799  | 1.749534  | 2.149635  |
| O  | 2.863587  | -2.074750 | 0.897418  |
| H  | 2.572265  | -1.832343 | -0.205729 |
| H  | 3.831527  | -2.063066 | 1.007233  |
| H  | 4.240490  | 0.990384  | -0.575176 |
| O  | 4.165667  | 0.877836  | -1.542848 |
| H  | 3.463696  | 0.192466  | -1.560571 |



## 6.2 Ni/B mechanism

TS BC.3  
 SCF Energy: -3022.64053556  
 ZPE-corrected Energy: -3022.31584  
 $\Delta U$ : -3022.29127  
 $\Delta H$ : -3022.29033  
 $\Delta G$ : -3022.37128  
 $S^2$  before (2.0093) and after higher multiplicity projection (2.0000)  
 Num. Imaginary Frequencies: 1  
 Imaginary Frequency: -179.7328

|    |           |           |           |
|----|-----------|-----------|-----------|
| N  | -0.912155 | 1.636457  | -0.309811 |
| C  | -0.633314 | 2.906280  | -0.020597 |
| C  | -1.624190 | 3.811851  | 0.351283  |
| C  | -2.938640 | 3.363269  | 0.422725  |
| C  | -3.223145 | 2.033473  | 0.123056  |
| C  | -2.177595 | 1.186436  | -0.243328 |
| H  | 0.425743  | 3.183404  | -0.081564 |
| H  | -1.360240 | 4.847984  | 0.582764  |
| H  | -3.746253 | 4.044264  | 0.712330  |
| H  | -4.252452 | 1.666693  | 0.173302  |
| C  | -2.358420 | -0.247309 | -0.565745 |
| N  | -1.247544 | -0.888829 | -0.960764 |
| C  | -1.286730 | -2.185005 | -1.253523 |
| C  | -2.461693 | -2.927260 | -1.162624 |
| C  | -3.622849 | -2.277836 | -0.755607 |
| C  | -3.576096 | -0.919053 | -0.455928 |
| Ni | 0.519692  | 0.214178  | -0.778900 |
| H  | -0.334487 | -2.624407 | -1.579667 |
| H  | -2.459066 | -3.993449 | -1.407965 |
| H  | -4.567385 | -2.825748 | -0.669439 |
| H  | -4.480566 | -0.396446 | -0.131621 |
| O  | 2.020675  | 1.571029  | -0.423206 |
| B  | 2.204735  | 1.042020  | 0.890645  |
| Cl | 1.662301  | -0.994207 | -2.370794 |
| O  | 1.704767  | 1.896141  | 1.878870  |
| C  | 0.883436  | -0.590773 | 1.122727  |
| H  | 1.733496  | 1.495228  | 2.758067  |
| C  | 1.441777  | -1.879177 | 1.017601  |
| C  | 1.031850  | -2.936187 | 1.831395  |
| C  | 0.034332  | -2.734424 | 2.786337  |
| C  | -0.527391 | -1.465339 | 2.932116  |
| C  | -0.098029 | -0.418380 | 2.115204  |
| H  | 2.212698  | -2.063093 | 0.255919  |
| H  | 1.488963  | -3.927547 | 1.716665  |
| H  | -0.297477 | -3.563125 | 3.424097  |
| H  | -1.301718 | -1.291754 | 3.690729  |
| H  | -0.546079 | 0.577385  | 2.259218  |
| O  | 3.435090  | 0.363267  | 1.034257  |
| H  | 2.829142  | 1.395631  | -0.984224 |
| H  | 3.527892  | -0.082124 | 1.887533  |
| H  | 3.665491  | -0.088175 | -1.996713 |
| O  | 4.237737  | 0.605148  | -1.596171 |
| H  | 4.380039  | 0.298236  | -0.676479 |

TS BC  
 SCF Energy: -3022.62336288  
 ZPE-corrected Energy: -3022.29912  
 $\Delta U$ : -3022.27441  
 $\Delta H$ : -3022.27347  
 $\Delta G$ : -3022.35377  
 $S^2$  before (0.9100) and after higher multiplicity projection (0.0238)  
 Num. Imaginary Frequencies: 1  
 Imaginary Frequency: -264.7478

|    |           |           |           |
|----|-----------|-----------|-----------|
| N  | 1.150477  | -1.574444 | -0.206425 |
| C  | 1.055882  | -2.862357 | 0.111906  |
| C  | 2.162755  | -3.605597 | 0.515549  |
| C  | 3.396865  | -2.967506 | 0.590793  |
| C  | 3.488159  | -1.616734 | 0.265716  |
| C  | 2.333581  | -0.942849 | -0.133487 |
| H  | 0.050646  | -3.295199 | 0.043533  |
| H  | 2.051437  | -4.664660 | 0.766699  |
| H  | 4.291007  | -3.517351 | 0.903983  |
| H  | 4.451427  | -1.101217 | 0.321335  |
| C  | 2.298954  | 0.491600  | -0.492945 |
| N  | 1.103786  | 0.953227  | -0.900822 |
| C  | 0.954678  | 2.231926  | -1.238282 |
| C  | 2.007124  | 3.139738  | -1.170403 |
| C  | 3.250077  | 2.681697  | -0.744371 |
| C  | 3.402812  | 1.340282  | -0.407284 |
| Ni | -0.450117 | -0.333470 | -0.735179 |
| H  | -0.047710 | 2.515936  | -1.583411 |
| H  | 1.847858  | 4.185431  | -1.449604 |
| H  | 4.103400  | 3.364944  | -0.675501 |
| H  | 4.374126  | 0.963612  | -0.073834 |
| O  | -1.767465 | -1.789422 | -0.341522 |
| B  | -2.039100 | -1.279720 | 0.958963  |
| Cl | -1.567699 | 0.510013  | -2.588749 |
| O  | -1.374944 | -1.975006 | 1.966846  |
| C  | -0.999214 | 0.593705  | 1.039199  |
| H  | -1.488213 | -1.565622 | 2.835191  |
| C  | -1.787824 | 1.732349  | 0.794944  |
| C  | -1.635290 | 2.907355  | 1.531670  |
| C  | -0.671888 | 2.977016  | 2.540032  |
| C  | 0.117835  | 1.859667  | 2.814601  |
| C  | -0.054937 | 0.688781  | 2.074028  |
| H  | -2.534930 | 1.699016  | -0.012127 |
| H  | -2.266814 | 3.778696  | 1.315266  |
| H  | -0.542140 | 3.900710  | 3.117468  |
| H  | 0.870466  | 1.902487  | 3.612684  |
| H  | 0.572978  | -0.185165 | 2.309343  |
| O  | -3.353741 | -0.800188 | 1.104730  |
| H  | -2.584835 | -1.722372 | -0.920589 |
| H  | -3.505121 | -0.347879 | 1.946148  |
| H  | -3.505838 | -0.391857 | -2.031853 |
| O  | -4.023888 | -1.093850 | -1.572531 |
| H  | -4.225054 | -0.732158 | -0.685262 |

## 6.2 Ni/B mechanism

## TS D1E1

SCF Energy: -3134.88552465  
 ZPE-corrected Energy: -3134.45660  
 $\Delta U$ : -3134.42997  
 $\Delta H$ : -3134.42903  
 $\Delta G$ : -3134.51254

Num. Imaginary Frequencies: 1

Imaginary Frequency: -268.6897

|    |           |           |           |
|----|-----------|-----------|-----------|
| Ni | 0.881607  | -0.275456 | 0.513352  |
| N  | -0.951414 | -0.358894 | 1.345771  |
| C  | -1.363810 | -1.448029 | 1.990918  |
| C  | -2.607659 | -1.517449 | 2.607912  |
| C  | -3.427527 | -0.390945 | 2.566539  |
| C  | -2.973698 | 0.756465  | 1.927319  |
| C  | -1.713064 | 0.743690  | 1.319802  |
| C  | -1.106044 | 1.926719  | 0.669784  |
| H  | -0.651214 | -2.282964 | 2.021943  |
| H  | -2.917817 | -2.432153 | 3.122018  |
| H  | -4.409943 | -0.398408 | 3.051155  |
| H  | -3.584125 | 1.664485  | 1.925354  |
| N  | 0.198237  | 1.814886  | 0.385409  |
| C  | 0.835618  | 2.837026  | -0.169619 |
| C  | 0.201508  | 4.036770  | -0.485570 |
| C  | -1.156969 | 4.156268  | -0.210915 |
| C  | -1.823239 | 3.089222  | 0.381267  |
| H  | 1.907051  | 2.689502  | -0.368061 |
| H  | 0.765600  | 4.856079  | -0.942039 |
| H  | -1.698426 | 5.076279  | -0.456393 |
| H  | -2.893955 | 3.160326  | 0.597418  |
| Cl | 1.665088  | -0.345021 | 2.645609  |
| C  | 2.634151  | -0.464918 | -0.311718 |
| C  | 0.204681  | -0.716247 | -1.316956 |
| C  | 1.123229  | -1.643408 | -0.773200 |
| C  | 1.400046  | -2.953302 | -0.773123 |
| H  | 2.098500  | -3.391322 | -0.047854 |
| H  | 0.985681  | -3.619924 | -1.542749 |
| N  | -1.178637 | -0.942565 | -1.516780 |
| C  | -1.893653 | 0.110853  | -2.055905 |
| C  | -3.381261 | -0.075118 | -2.259463 |
| C  | -3.866123 | -1.511246 | -2.288904 |
| C  | -3.245136 | -2.254010 | -1.122603 |
| C  | -1.739658 | -2.268160 | -1.264326 |
| O  | -1.364158 | 1.176398  | -2.321130 |
| H  | -3.863374 | 0.471056  | -1.419886 |
| H  | -3.645891 | 0.490047  | -3.170701 |
| H  | -3.562694 | -1.997946 | -3.238556 |
| H  | -4.970246 | -1.547151 | -2.254511 |
| H  | -3.603405 | -3.298105 | -1.061966 |
| H  | -3.529207 | -1.760884 | -0.168522 |
| H  | -1.446810 | -2.946922 | -2.094210 |
| H  | -1.266880 | -2.673422 | -0.352868 |
| H  | 0.564109  | 0.070232  | -1.990258 |
| C  | 2.996527  | 0.407205  | -1.349298 |
| C  | 4.339531  | 0.648927  | -1.657996 |
| C  | 5.347887  | 0.014050  | -0.943486 |
| C  | 5.001513  | -0.865236 | 0.089527  |
| C  | 3.670388  | -1.099140 | 0.399895  |
| H  | 2.235219  | 0.924098  | -1.945930 |
| H  | 4.588840  | 1.343500  | -2.469801 |
| H  | 6.401268  | 0.198198  | -1.185484 |
| H  | 5.786344  | -1.369075 | 0.667054  |
| H  | 3.412438  | -1.772493 | 1.224602  |

## TS DE

SCF Energy: -3134.88136703  
 ZPE-corrected Energy: -3134.45261  
 $\Delta U$ : -3134.42591  
 $\Delta H$ : -3134.42497  
 $\Delta G$ : -3134.50909

Num. Imaginary Frequencies: 1

Imaginary Frequency: -301.3293

|    |           |           |           |
|----|-----------|-----------|-----------|
| Ni | -0.268780 | -1.009556 | -0.160988 |
| N  | -2.132153 | -0.558328 | -0.724439 |
| C  | -2.692924 | -1.161507 | -1.769374 |
| C  | -4.003246 | -0.906032 | -2.155456 |
| C  | -4.743525 | 0.004540  | -1.404877 |
| C  | -4.155868 | 0.614289  | -0.302754 |
| C  | -2.830706 | 0.308959  | 0.019849  |
| C  | -2.121034 | 0.861633  | 1.193234  |
| H  | -2.061597 | -1.885038 | -2.303487 |
| H  | -4.432808 | -1.417752 | -3.021881 |
| H  | -5.781741 | 0.232179  | -1.669728 |
| H  | -4.731720 | 1.314307  | 0.309267  |
| N  | -0.923088 | 0.321348  | 1.445528  |
| C  | -0.229619 | 0.727888  | 2.500038  |
| C  | -0.680522 | 1.728578  | 3.358225  |
| C  | -1.914547 | 2.314476  | 3.091425  |
| C  | -2.652337 | 1.869558  | 2.000258  |
| H  | 0.733862  | 0.225293  | 2.668830  |
| H  | -0.075127 | 2.035402  | 4.217015  |
| H  | -2.306153 | 3.111833  | 3.732579  |
| H  | -3.624193 | 2.318648  | 1.775173  |
| Cl | -1.146569 | -2.916732 | 0.713513  |
| C  | 1.569379  | -1.511327 | 0.219298  |
| C  | 0.434903  | 0.220730  | -1.552288 |
| C  | 0.963723  | -1.096399 | -1.607293 |
| C  | 1.384959  | -1.960878 | -2.535000 |
| H  | 1.604637  | -3.010990 | -2.304095 |
| H  | 1.552069  | -1.621854 | -3.567701 |
| N  | 1.265243  | 1.354717  | -1.310029 |
| C  | 0.665374  | 2.475153  | -0.782418 |
| C  | 1.550605  | 3.662303  | -0.467105 |
| C  | 3.040515  | 3.402785  | -0.587247 |
| C  | 3.285846  | 2.676483  | -1.895562 |
| C  | 2.627873  | 1.312929  | -1.853503 |
| O  | -0.531720 | 2.516488  | -0.554651 |
| H  | 1.243784  | 4.475381  | -1.156181 |
| H  | 1.251779  | 4.004453  | 0.541446  |
| H  | 3.396592  | 2.775714  | 0.256890  |
| H  | 3.604477  | 4.351778  | -0.534452 |
| H  | 4.363303  | 2.542536  | -2.102348 |
| H  | 2.871795  | 3.278430  | -2.730676 |
| H  | 3.240171  | 0.617000  | -1.245223 |
| H  | 2.573610  | 0.872998  | -2.868173 |
| H  | -0.428674 | 0.452918  | -2.195778 |
| C  | 2.352022  | -0.533424 | 0.850331  |
| C  | 3.481177  | -0.878893 | 1.599358  |
| C  | 3.851931  | -2.213063 | 1.728840  |
| C  | 3.074623  | -3.200301 | 1.113088  |
| C  | 1.949185  | -2.856036 | 0.377007  |
| H  | 2.077705  | 0.523960  | 0.762276  |
| H  | 4.069616  | -0.090440 | 2.086097  |
| H  | 4.738364  | -2.489304 | 2.311956  |
| H  | 3.345362  | -4.257706 | 1.221726  |
| H  | 1.329423  | -3.638449 | -0.074250 |

## 6.2 Ni/B mechanism

TS EE1  
 SCF Energy: -3134.92777299  
 ZPE-corrected Energy: -3134.49887  
 $\Delta U$ : -3134.47204  
 $\Delta H$ : -3134.47109  
 $\Delta G$ : -3134.55739  
 $S^2$  before (1.0347) and after higher multiplicity projection (0.2806)

Num. Imaginary Frequencies: 1

Imaginary Frequency: -36.7345

|    |           |           |           |
|----|-----------|-----------|-----------|
| Ni | 1.446796  | 0.061265  | -1.285798 |
| N  | 1.144317  | 2.038324  | -0.785385 |
| C  | 1.299201  | 2.298482  | 0.527106  |
| C  | 0.897133  | 3.518218  | 1.074225  |
| C  | 0.336627  | 4.480063  | 0.240921  |
| C  | 0.199496  | 4.206314  | -1.117645 |
| C  | 0.615205  | 2.963180  | -1.583562 |
| H  | 1.009767  | 3.714875  | 2.144357  |
| H  | 0.007168  | 5.439473  | 0.653479  |
| H  | -0.232009 | 4.937661  | -1.807563 |
| H  | 0.515667  | 2.689093  | -2.642020 |
| C  | 1.899109  | 1.200790  | 1.316657  |
| C  | 2.144925  | 1.260447  | 2.689049  |
| C  | 2.730151  | 0.160818  | 3.312004  |
| C  | 3.064992  | -0.957649 | 2.553373  |
| C  | 2.783163  | -0.940247 | 1.189648  |
| N  | 2.208927  | 0.105992  | 0.604023  |
| H  | 1.885280  | 2.150420  | 3.270147  |
| H  | 2.928503  | 0.183622  | 4.389081  |
| H  | 3.535494  | -1.835224 | 3.007389  |
| H  | 3.023694  | -1.781202 | 0.524121  |
| Cl | 3.054607  | -1.114736 | -2.329727 |
| C  | -0.488962 | -0.581052 | -1.020739 |
| C  | -0.157961 | -0.460806 | -2.384536 |
| C  | -1.392340 | 0.416602  | -0.407938 |
| C  | -0.249354 | -1.823393 | -0.233731 |
| H  | -0.608417 | 0.371625  | -2.948365 |
| H  | 0.169601  | -1.313959 | -2.992932 |
| C  | 0.299546  | -2.986265 | -0.800958 |
| C  | 0.551159  | -4.112244 | -0.021643 |
| C  | 0.258364  | -4.113539 | 1.342454  |
| C  | -0.283279 | -2.966294 | 1.921778  |
| C  | -0.532058 | -1.838111 | 1.145243  |
| H  | 0.567818  | -3.006783 | -1.862481 |
| H  | 0.984638  | -5.003488 | -0.490839 |
| H  | 0.454744  | -5.004086 | 1.950866  |
| H  | -0.511718 | -2.945841 | 2.994383  |
| H  | -0.934810 | -0.932667 | 1.620554  |
| N  | -2.729937 | 0.120148  | -0.164223 |
| C  | -3.391540 | 0.882507  | 0.787972  |
| C  | -4.865201 | 0.627056  | 1.008303  |
| C  | -5.565761 | -0.150903 | -0.088776 |
| C  | -4.709789 | -1.349053 | -0.448100 |
| C  | -3.385660 | -0.883395 | -1.009081 |
| O  | -2.797278 | 1.716422  | 1.452717  |
| H  | -5.327770 | 1.612195  | 1.200283  |
| H  | -4.938533 | 0.075356  | 1.968792  |
| H  | -6.576559 | -0.454327 | 0.239606  |
| H  | -5.701634 | 0.486691  | -0.986607 |
| H  | -4.537161 | -1.970573 | 0.454996  |
| H  | -5.200184 | -1.999121 | -1.195402 |
| H  | -2.696528 | -1.738351 | -1.128223 |
| H  | -3.528376 | -0.449944 | -2.022185 |
| H  | -1.055225 | 1.317870  | 0.111482  |

TS enamide Z-E

SCF Energy: -672.620672804

ZPE-corrected Energy: -672.344915

$\Delta U$ : -672.330281

$\Delta H$ : -672.329337

$\Delta G$ : -672.387751

$S^2$  before (1.0393) and after higher multiplicity projection (0.3167)

Num. Imaginary Frequencies: 1

Imaginary Frequency: -564.4642

|   |           |           |           |
|---|-----------|-----------|-----------|
| C | 0.839158  | 1.268393  | -0.147666 |
| C | 0.937411  | 2.608413  | 0.521051  |
| C | -0.398352 | 0.929334  | -0.855881 |
| N | -1.476412 | 0.327637  | -0.214242 |
| H | -0.602047 | 1.222523  | -1.893811 |
| C | -1.282878 | -0.131125 | 1.165262  |
| C | -2.579433 | -0.460197 | 1.870784  |
| C | -3.432318 | -1.354638 | 0.993797  |
| C | -3.788466 | -0.588867 | -0.265480 |
| C | -2.629819 | 0.095243  | -0.954963 |
| O | -2.715938 | 0.458065  | -2.115278 |
| H | -0.734621 | 0.657463  | 1.713865  |
| H | -0.618808 | -1.021539 | 1.152574  |
| H | -2.340167 | -0.935863 | 2.839416  |
| H | -3.134463 | 0.472791  | 2.099571  |
| H | -2.863991 | -2.272738 | 0.738485  |
| H | -4.347940 | -1.684276 | 1.517746  |
| H | -4.525528 | 0.206727  | -0.027539 |
| H | -4.273705 | -1.221359 | -1.030304 |
| C | 1.945369  | 0.359242  | -0.131125 |
| C | 3.168579  | 0.677828  | 0.515900  |
| C | 4.228632  | -0.217762 | 0.528603  |
| C | 4.117373  | -1.461939 | -0.099613 |
| C | 2.923137  | -1.797939 | -0.747074 |
| C | 1.859475  | -0.909249 | -0.765309 |
| H | 3.284025  | 1.647456  | 1.013456  |
| H | 5.161411  | 0.056567  | 1.035800  |
| H | 4.957715  | -2.165451 | -0.087225 |
| H | 2.826570  | -2.768970 | -1.247288 |
| H | 0.928599  | -1.176583 | -1.282797 |
| H | 1.721453  | 3.248190  | 0.063598  |
| H | -0.019176 | 3.155710  | 0.449208  |
| H | 1.195844  | 2.520948  | 1.597447  |

## 6.3 3 component extension of the Ni/B mechanism

AcH  
 SCF Energy: -153.609254569  
 ZPE-corrected Energy: -153.554229  
 $\Delta U$ : -153.550318  
 $\Delta H$ : -153.549373  
 $\Delta G$ : -153.579193

Num. Imaginary Frequencies: 0  

|   |           |           |           |
|---|-----------|-----------|-----------|
| C | -0.231741 | 0.393598  | -0.000015 |
| O | -1.231736 | -0.273839 | -0.000007 |
| H | -0.297043 | 1.518142  | 0.000020  |
| C | 1.161829  | -0.147763 | -0.000021 |
| H | 1.710989  | 0.224120  | -0.885825 |
| H | 1.710555  | 0.224009  | 0.886091  |
| H | 1.148865  | -1.250571 | -0.000008 |

PFAlpha.NA  
 SCF Energy: -3288.57191515  
 ZPE-corrected Energy: 0

$\Delta U$ : 0  
 $\Delta H$ : 0  
 $\Delta G$ : 0

Num. Imaginary Frequencies: 0  

|    |           |           |           |
|----|-----------|-----------|-----------|
| Ni | 0.240040  | -1.348861 | -1.301147 |
| N  | 0.171036  | -2.653204 | 0.203309  |
| C  | 1.233812  | -3.247331 | 0.747903  |
| C  | 1.230008  | -3.698152 | 2.065115  |
| C  | 0.091852  | -3.492120 | 2.841360  |
| C  | -1.016335 | -2.870167 | 2.272643  |
| C  | -0.944385 | -2.473756 | 0.940061  |
| H  | 2.106512  | -3.336345 | 0.086200  |
| H  | 2.117531  | -4.188899 | 2.476655  |
| H  | 0.068240  | -3.806132 | 3.890451  |
| H  | -1.912603 | -2.659455 | 2.864437  |
| C  | -2.042647 | -1.837367 | 0.197132  |
| N  | -1.651559 | -1.203309 | -0.928929 |
| C  | -2.577297 | -0.689768 | -1.743594 |
| C  | -3.938153 | -0.772007 | -1.472354 |
| C  | -4.348190 | -1.396735 | -0.295838 |
| C  | -3.386841 | -1.935267 | 0.551928  |
| H  | -2.208640 | -0.194872 | -2.649135 |
| H  | -4.660619 | -0.349747 | -2.177626 |
| H  | -5.411797 | -1.475364 | -0.046143 |
| H  | -3.675265 | -2.451936 | 1.472338  |
| Cl | 2.134015  | -2.025139 | -2.149431 |
| C  | 0.886181  | 0.879644  | -0.587173 |
| C  | 0.442323  | 0.463606  | -1.925548 |
| C  | 0.068223  | 1.369673  | 0.371505  |
| H  | 1.207299  | 0.532172  | -2.714139 |
| H  | -0.509447 | 0.916753  | -2.253704 |
| N  | -1.286806 | 1.743284  | 0.179869  |
| H  | 0.437798  | 1.509564  | 1.397753  |
| C  | -1.532789 | 2.911058  | -0.678460 |
| C  | -3.007247 | 3.150938  | -0.913338 |
| C  | -3.737642 | 3.195327  | 0.415269  |
| C  | -3.580544 | 1.853864  | 1.108060  |
| C  | -2.178836 | 1.281515  | 1.114301  |
| O  | -1.874860 | 0.399621  | 1.902836  |
| H  | -1.008564 | 2.747868  | -1.637970 |
| H  | -1.064880 | 3.802468  | -0.209858 |
| H  | -3.127996 | 4.094146  | -1.477270 |
| H  | -3.429640 | 2.340280  | -1.544781 |
| H  | -3.306029 | 4.002105  | 1.041876  |
| H  | -4.808575 | 3.436244  | 0.282611  |
| H  | -4.217390 | 1.091003  | 0.611161  |
| H  | -3.910163 | 1.874561  | 2.162318  |
| C  | 2.306859  | 0.649705  | -0.202411 |
| C  | 3.353240  | 1.062543  | -1.036016 |
| C  | 4.681488  | 0.854862  | -0.674492 |
| C  | 4.991133  | 0.219355  | 0.527577  |
| C  | 3.958860  | -0.203781 | 1.364666  |
| C  | 2.630847  | 0.011623  | 1.002998  |
| H  | 3.120514  | 1.553706  | -1.989195 |
| H  | 5.485028  | 1.185484  | -1.343378 |
| H  | 6.036707  | 0.045424  | 0.807670  |
| H  | 4.189452  | -0.718144 | 2.305672  |
| H  | 1.820448  | -0.348794 | 1.651890  |
| C  | 1.754245  | 4.199406  | 0.530876  |
| C  | 2.964619  | 3.890247  | 1.345114  |
| H  | 1.754184  | 3.750463  | -0.501201 |
| O  | 0.829108  | 4.850372  | 0.906167  |
| H  | 3.881611  | 4.170966  | 0.793260  |
| H  | 2.922980  | 4.409688  | 2.317429  |
| H  | 3.024543  | 2.793429  | 1.499661  |

### 6.3 3 component extension of the Ni/B mechanism

PFalpha  
 SCF Energy: -3696.25625734  
 ZPE-corrected Energy: -3695.63710  
 $\Delta U$ : -3695.59863  
 $\Delta H$ : -3695.59769  
 $\Delta G$ : -3695.70667  
 $S^2$  before (0.4938) and after higher multiplicity projection (0.0137)  
 Num. Imaginary Frequencies: 0

|    |           |           |           |
|----|-----------|-----------|-----------|
| Ni | 2.308988  | -0.988780 | -0.427421 |
| N  | 2.118925  | -1.525809 | 1.448767  |
| C  | 2.657993  | -0.861503 | 2.472455  |
| C  | 2.243327  | -1.081836 | 3.781923  |
| C  | 1.240794  | -2.017964 | 4.016825  |
| C  | 0.689993  | -2.713977 | 2.944689  |
| C  | 1.151299  | -2.436876 | 1.662867  |
| H  | 3.447857  | -0.146287 | 2.211962  |
| H  | 2.699999  | -0.517366 | 4.599857  |
| H  | 0.881495  | -2.204338 | 5.034152  |
| H  | -0.111791 | -3.440563 | 3.104438  |
| C  | 0.673214  | -3.095948 | 0.439892  |
| N  | 1.067143  | -2.502092 | -0.707037 |
| C  | 0.780025  | -3.072691 | -1.877850 |
| C  | 0.065259  | -4.261810 | -1.973161 |
| C  | -0.371447 | -4.866743 | -0.798602 |
| C  | -0.063758 | -4.277751 | 0.424116  |
| H  | 1.144995  | -2.562072 | -2.776720 |
| H  | -0.141563 | -4.697272 | -2.955142 |
| H  | -0.940648 | -5.801593 | -0.830552 |
| H  | -0.372435 | -4.749474 | 1.361338  |
| Cl | 4.391080  | -0.321468 | -0.249709 |
| C  | 1.357333  | 1.106497  | -1.300457 |
| C  | 1.854022  | 0.127222  | -2.156811 |
| C  | -0.069233 | 1.211657  | -0.904888 |
| H  | 2.870877  | 0.232131  | -2.559931 |
| H  | 1.142455  | -0.461101 | -2.750887 |
| N  | -0.910239 | 0.104381  | -1.350705 |
| H  | -0.118685 | 1.224986  | 0.199725  |
| C  | -1.496803 | 0.187476  | -2.689337 |
| C  | -2.070693 | -1.137616 | -3.136304 |
| C  | -3.130921 | -1.570157 | -2.142840 |
| C  | -2.538351 | -1.672953 | -0.746256 |
| C  | -1.416556 | -0.722271 | -0.389511 |
| O  | -0.956418 | -0.756917 | 0.750946  |
| H  | -0.711849 | 0.532691  | -3.388380 |
| H  | -2.296402 | 0.954981  | -2.689918 |
| H  | -2.494801 | -1.022986 | -4.150956 |
| H  | -1.264570 | -1.898926 | -3.208363 |
| H  | -3.939813 | -0.813158 | -2.139935 |
| H  | -3.597464 | -2.529839 | -2.433922 |
| H  | -2.134743 | -2.687618 | -0.550733 |
| H  | -3.309217 | -1.511196 | 0.032330  |
| C  | 2.284338  | 2.070685  | -0.683078 |
| C  | 3.311113  | 2.653644  | -1.439573 |
| C  | 4.200404  | 3.546411  | -0.854049 |
| C  | 4.094858  | 3.844516  | 0.504242  |
| C  | 3.080384  | 3.266334  | 1.267569  |
| C  | 2.168731  | 2.399427  | 0.677443  |
| H  | 3.396863  | 2.420702  | -2.507291 |
| H  | 4.987453  | 4.008888  | -1.459980 |
| H  | 4.803651  | 4.538882  | 0.969799  |
| H  | 2.988280  | 3.506114  | 2.332702  |
| H  | 1.359884  | 1.975934  | 1.286379  |
| C  | -0.845045 | 2.582667  | -1.229380 |
| C  | -0.181506 | 3.858090  | -0.735041 |
| H  | -0.868783 | 2.648708  | -2.342518 |
| O  | -2.120717 | 2.420494  | -0.781753 |
| H  | -0.888317 | 4.681902  | -0.940095 |
| H  | -0.013583 | 3.843070  | 0.354360  |
| H  | 0.769495  | 4.079758  | -1.252860 |
| B  | -2.499296 | 2.478326  | 0.700094  |
| C  | -3.800097 | 1.482423  | 0.826400  |
| C  | -4.170792 | 0.959455  | 2.077316  |
| C  | -5.279718 | 0.128240  | 2.238434  |
| C  | -6.072038 | -0.202634 | 1.136851  |
| C  | -5.738726 | 0.312361  | -0.115954 |
| C  | -4.617836 | 1.134421  | -0.259565 |
| H  | -3.563297 | 1.221057  | 2.956319  |
| H  | -5.535714 | -0.262154 | 3.232722  |
| H  | -6.949356 | -0.851202 | 1.257127  |
| H  | -6.357472 | 0.066476  | -0.990504 |
| H  | -4.361600 | 1.527477  | -1.254536 |
| O  | -2.799442 | 3.850561  | 1.068285  |
| O  | -1.412858 | 2.032186  | 1.575478  |
| H  | -1.476165 | 1.072093  | 1.693555  |
| H  | -3.401309 | 4.201730  | 0.397832  |

PFgamma  
 SCF Energy: -3696.25683417  
 ZPE-corrected Energy: -3695.63872  
 $\Delta U$ : -3695.59896  
 $\Delta H$ : -3695.59801  
 $\Delta G$ : -3695.71178  
 $S^2$  before (0.9761) and after higher multiplicity projection (0.0274)  
 Num. Imaginary Frequencies: 0

|    |           |           |           |
|----|-----------|-----------|-----------|
| Ni | -1.815629 | 0.366497  | 0.814366  |
| N  | -3.250445 | -0.710638 | -0.047793 |
| C  | -4.262665 | -0.220994 | -0.758917 |
| C  | -5.227862 | -1.048085 | -1.321706 |
| C  | -5.123014 | -2.420142 | -1.110314 |
| C  | -4.069675 | -2.919721 | -0.352335 |
| C  | -3.130205 | -2.031353 | 0.167752  |
| H  | -4.297471 | 0.871491  | -0.873863 |
| H  | -6.045101 | -0.619603 | -1.908741 |
| H  | -5.863347 | -3.105473 | -1.535968 |
| H  | -3.975449 | -3.996116 | -0.185760 |
| C  | -1.950569 | -2.448791 | 0.959075  |
| N  | -1.093797 | -1.465917 | 1.297428  |
| C  | 0.000633  | -1.729983 | 2.010580  |
| C  | 0.302025  | -3.022419 | 2.433231  |
| C  | -0.570425 | -4.051685 | 2.095441  |
| C  | -1.708897 | -3.766254 | 1.345863  |
| H  | 0.674520  | -0.889614 | 2.236836  |
| H  | 1.211157  | -3.206126 | 3.013314  |
| H  | -0.368196 | -5.080127 | 2.412872  |
| H  | -2.403483 | -4.566305 | 1.075375  |
| Cl | -2.794103 | 0.981005  | 2.674936  |
| C  | -0.518055 | 1.407468  | -0.527848 |
| C  | 0.443086  | 1.603086  | 0.611766  |
| C  | -0.592497 | 0.274118  | -1.315029 |
| H  | -0.138998 | 1.896348  | 1.516541  |
| H  | 0.949580  | 0.664402  | 0.879578  |
| N  | 0.279869  | -0.786628 | -1.445366 |
| H  | -1.453980 | 0.176914  | -1.990984 |
| C  | 1.752015  | -0.673529 | -1.375145 |
| C  | 2.369572  | -1.861158 | -0.653867 |
| C  | 1.698244  | -3.186341 | -1.040790 |
| C  | 0.784354  | -3.022468 | -2.254265 |
| C  | -0.244879 | -1.957271 | -1.998995 |
| O  | -1.434946 | -2.093297 | -2.210243 |
| H  | 2.038294  | 0.279894  | -0.899564 |
| H  | 2.123137  | -0.619455 | -2.418629 |
| H  | 3.447294  | -1.864620 | -0.899060 |
| H  | 2.325462  | -1.683847 | 0.437711  |
| H  | 2.447061  | -3.971533 | -1.248150 |
| H  | 1.086543  | -3.567555 | -0.198579 |
| H  | 0.242900  | -3.949082 | -2.507680 |
| H  | 1.381486  | -2.738338 | -3.144700 |
| C  | -1.467278 | 2.507065  | -0.859162 |
| C  | -1.903567 | 2.714204  | -2.181740 |
| C  | -2.838838 | 3.697345  | -2.486724 |
| C  | -3.354679 | 4.512412  | -1.479108 |
| C  | -2.910870 | 4.344316  | -0.169231 |
| C  | -1.972466 | 3.362755  | 0.138250  |
| H  | -1.475862 | 2.115881  | -2.994084 |
| H  | -3.153288 | 3.840760  | -3.526802 |
| H  | -4.089140 | 5.289653  | -1.718437 |
| H  | -3.297917 | 4.984743  | 0.630953  |
| H  | -1.662412 | 3.251585  | 1.182279  |
| C  | 1.583542  | 2.661172  | 0.410120  |
| O  | 2.750712  | 2.043531  | 0.021027  |
| H  | 1.259942  | 3.313902  | -0.434807 |
| C  | 1.697280  | 3.544929  | 1.644198  |
| H  | 1.877658  | 2.942069  | 2.551746  |
| H  | 2.545035  | 4.243038  | 1.538212  |
| H  | 0.766299  | 4.130444  | 1.782983  |
| B  | 3.636618  | 1.292116  | 0.969082  |
| C  | 4.695356  | 0.478756  | 0.018619  |
| C  | 5.468714  | -0.554281 | 0.572654  |
| C  | 6.402931  | -1.269462 | -0.175494 |
| C  | 6.594593  | -0.965909 | -1.525788 |
| C  | 5.848612  | 0.061748  | -2.102697 |
| C  | 4.919934  | 0.769919  | -1.334798 |
| H  | 5.317781  | -0.813325 | 1.631480  |
| H  | 6.988076  | -2.072634 | 0.292641  |
| H  | 7.326974  | -1.524721 | -2.122578 |
| H  | 5.995432  | 0.314972  | -3.161584 |
| H  | 4.331277  | 1.572504  | -1.800746 |
| O  | 4.347363  | 2.163706  | 1.904123  |
| O  | 2.832067  | 0.372386  | 1.810967  |
| H  | 5.051134  | 2.621664  | 1.425296  |
| H  | 3.194217  | 0.473623  | 2.702889  |

### 6.3 3 component extension of the Ni/B mechanism

TSalpha  
 SCF Energy: -3696.24928642  
 ZPE-corrected Energy: -3695.63287  
 $\Delta U$ : -3695.59418  
 $\Delta H$ : -3695.59324  
 $\Delta G$ : -3695.70260  
 $S^2$  before (0.3341) and after higher multiplicity projection (0.0118)

Num. Imaginary Frequencies: 1

Imaginary Frequency: -316.4569

|    |           |           |           |
|----|-----------|-----------|-----------|
| Ni | 2.615521  | -0.957578 | -0.701032 |
| N  | 2.757936  | -1.228398 | 1.271223  |
| C  | 3.515780  | -0.493628 | 2.085423  |
| C  | 3.244034  | -0.396638 | 3.447528  |
| C  | 2.134963  | -1.065849 | 3.958273  |
| C  | 1.351152  | -1.839821 | 3.105893  |
| C  | 1.702650  | -1.907416 | 1.761630  |
| H  | 4.352081  | 0.029947  | 1.603144  |
| H  | 3.887175  | 0.211840  | 4.090563  |
| H  | 1.874796  | -0.983425 | 5.018816  |
| H  | 0.460118  | -2.358125 | 3.473120  |
| C  | 1.007685  | -2.719991 | 0.752429  |
| N  | 1.286178  | -2.378058 | -0.521806 |
| C  | 0.809736  | -3.121069 | -1.523179 |
| C  | 0.023125  | -4.245403 | -1.304520 |
| C  | -0.294959 | -4.589210 | 0.007811  |
| C  | 0.200356  | -3.815453 | 1.050904  |
| H  | 1.078586  | -2.804351 | -2.537911 |
| H  | -0.335494 | -4.834421 | -2.154159 |
| H  | -0.918231 | -5.464698 | 0.219070  |
| H  | -0.012575 | -4.074646 | 2.092109  |
| Cl | 4.636491  | -0.156041 | -0.992707 |
| C  | 1.232481  | 0.881690  | -1.304192 |
| C  | 1.806030  | -0.001803 | -2.269883 |
| C  | -0.094866 | 0.826491  | -0.813890 |
| H  | 2.665976  | 0.356950  | -2.851873 |
| H  | 1.120007  | -0.652032 | -2.831524 |
| N  | -0.998008 | -0.218050 | -1.195848 |
| H  | -0.225718 | 1.104130  | 0.239029  |
| C  | -1.552803 | -0.198363 | -2.554459 |
| C  | -2.256170 | -1.490467 | -2.902655 |
| C  | -3.358369 | -1.724473 | -1.888168 |
| C  | -2.763762 | -1.823916 | -0.494131 |
| C  | -1.600025 | -0.912001 | -0.179180 |
| O  | -1.182408 | -0.853008 | 0.977037  |
| H  | -0.732621 | 0.017434  | -3.261742 |
| H  | -2.283068 | 0.631751  | -2.632440 |
| H  | -2.660906 | -1.411232 | -3.928553 |
| H  | -1.537137 | -2.336878 | -2.902690 |
| H  | -4.063339 | -0.869948 | -1.924528 |
| H  | -3.947187 | -2.631156 | -2.119970 |
| H  | -2.389897 | -2.849210 | -0.292526 |
| H  | -3.517823 | -1.623530 | 0.291694  |
| C  | 2.094392  | 1.931248  | -0.705886 |
| C  | 2.937226  | 2.709743  | -1.509896 |
| C  | 3.743022  | 3.693997  | -0.949542 |
| C  | 3.738069  | 3.901392  | 0.430063  |
| C  | 2.909695  | 3.127931  | 1.241940  |
| C  | 2.085856  | 2.159135  | 0.678119  |
| H  | 2.952657  | 2.548162  | -2.593979 |
| H  | 4.388773  | 4.301009  | -1.594159 |
| H  | 4.381985  | 4.669575  | 0.873457  |
| H  | 2.898929  | 3.283217  | 2.327276  |
| H  | 1.436359  | 1.560554  | 1.331211  |
| C  | -1.181117 | 2.495744  | -1.203823 |
| C  | -0.497090 | 3.666001  | -0.567142 |
| H  | -1.049567 | 2.441755  | -2.305456 |
| O  | -2.340025 | 2.120629  | -0.799028 |
| H  | -1.190777 | 4.522524  | -0.672591 |
| H  | -0.350706 | 3.516016  | 0.514891  |
| H  | 0.458468  | 3.912650  | -1.058225 |
| B  | -2.858323 | 2.279134  | 0.755400  |
| C  | -4.121596 | 1.257818  | 0.786246  |
| C  | -4.384226 | 0.475218  | 1.921034  |
| C  | -5.489506 | -0.373531 | 1.994841  |
| C  | -6.379221 | -0.456610 | 0.922874  |
| C  | -6.150787 | 0.319070  | -0.214228 |
| C  | -5.035370 | 1.156166  | -0.275314 |
| H  | -3.697317 | 0.534467  | 2.777012  |
| H  | -5.663650 | -0.972316 | 2.898353  |
| H  | -7.252588 | -1.118621 | 0.976334  |
| H  | -6.846163 | 0.265234  | -1.062312 |
| H  | -4.861596 | 1.749543  | -1.185520 |
| O  | -3.198426 | 3.657668  | 0.928401  |
| O  | -1.777888 | 1.929053  | 1.626069  |
| H  | -1.687972 | 0.963756  | 1.687659  |
| H  | -4.085992 | 3.814070  | 0.579985  |

TSgamma  
 SCF Energy: -3696.23735932  
 ZPE-corrected Energy: -3695.62326  
 $\Delta U$ : -3695.58301  
 $\Delta H$ : -3695.58206  
 $\Delta G$ : -3695.69702  
 $S^2$  before (0.5608) and after higher multiplicity projection (0.0229)

Num. Imaginary Frequencies: 1

Imaginary Frequency: -498.2717

|    |           |           |           |
|----|-----------|-----------|-----------|
| Ni | 1.642317  | 0.197162  | -0.704838 |
| N  | 3.198822  | -0.814034 | -0.106584 |
| C  | 4.270512  | -0.215693 | 0.405222  |
| C  | 5.358244  | -0.937611 | 0.881431  |
| C  | 5.311296  | -2.326798 | 0.800896  |
| C  | 4.194932  | -2.941316 | 0.245454  |
| C  | 3.136040  | -2.151595 | -0.202595 |
| H  | 4.250151  | 0.882530  | 0.422556  |
| H  | 6.222428  | -0.416550 | 1.303544  |
| H  | 6.145973  | -2.934036 | 1.166840  |
| H  | 4.146997  | -4.031374 | 0.174622  |
| C  | 1.897257  | -2.695582 | -0.803316 |
| N  | 0.958586  | -1.786866 | -1.114204 |
| C  | -0.179316 | -2.171931 | -1.686201 |
| C  | -0.448538 | -3.508325 | -1.977498 |
| C  | 0.510036  | -4.462357 | -1.650833 |
| C  | 1.699830  | -4.055014 | -1.054022 |
| H  | -0.918360 | -1.386921 | -1.911107 |
| H  | -1.396649 | -3.786239 | -2.448129 |
| H  | 0.337320  | -5.523364 | -1.861331 |
| H  | 2.465985  | -4.792662 | -0.798262 |
| Cl | 2.574936  | 0.788012  | -2.669936 |
| C  | 0.687970  | 1.554024  | 0.426896  |
| C  | -0.092173 | 1.513250  | -0.784050 |
| C  | 0.848904  | 0.445532  | 1.276299  |
| H  | 0.285062  | 2.113277  | -1.620339 |
| H  | -0.730280 | 0.655368  | -1.047884 |
| N  | -0.058463 | -0.583963 | 1.581634  |
| H  | 1.665899  | 0.511742  | 2.012118  |
| C  | -1.516108 | -0.408233 | 1.593176  |
| C  | -2.241735 | -1.649536 | 1.088015  |
| C  | -1.592500 | -2.948594 | 1.584990  |
| C  | -0.568617 | -2.680530 | 2.683610  |
| C  | 0.468606  | -1.693274 | 2.215283  |
| O  | 1.668611  | -1.851338 | 2.361645  |
| H  | -1.785874 | 0.469770  | 0.986556  |
| H  | -1.831446 | -0.175812 | 2.632610  |
| H  | -3.294716 | -1.573436 | 1.415573  |
| H  | -2.277477 | -1.623536 | -0.017151 |
| H  | -2.353656 | -3.662135 | 1.948839  |
| H  | -1.074165 | -3.458430 | 0.748563  |
| H  | -0.036764 | -3.593884 | 2.998425  |
| H  | -1.072446 | -2.269654 | 3.583069  |
| C  | 1.480889  | 2.776132  | 0.728702  |
| C  | 1.4446825 | 3.308461  | 2.025652  |
| C  | 2.134382  | 4.480583  | 2.334912  |
| C  | 2.868026  | 5.138015  | 1.349754  |
| C  | 2.913469  | 4.614083  | 0.056901  |
| C  | 2.225033  | 3.445645  | -0.257089 |
| H  | 0.854910  | 2.801296  | 2.797938  |
| H  | 2.090751  | 4.884688  | 3.352873  |
| H  | 3.410279  | 6.059925  | 1.589805  |
| H  | 3.502969  | 5.117103  | -0.718328 |
| H  | 2.315695  | 3.011150  | -1.262435 |
| C  | -1.749878 | 2.737612  | -0.590325 |
| O  | -2.726813 | 2.001261  | -0.232954 |
| H  | -1.290210 | 3.312730  | 0.239119  |
| C  | -1.719122 | 3.428097  | -1.920715 |
| H  | -1.790316 | 2.720354  | -2.762564 |
| H  | -2.607222 | 4.085139  | -1.981255 |
| H  | -0.805977 | 4.040461  | -2.021207 |
| B  | -3.621356 | 1.072465  | -1.204898 |
| C  | -4.637849 | 0.330719  | -0.193849 |
| C  | -5.288979 | -0.832486 | -0.633399 |
| C  | -6.219959 | -1.501152 | 0.159885  |
| C  | -6.527246 | -1.015672 | 1.432489  |
| C  | -5.899655 | 0.141642  | 1.892065  |
| C  | -4.971053 | 0.801909  | 1.083953  |
| H  | -5.041285 | -1.230059 | -1.628001 |
| H  | -6.709815 | -2.410433 | -0.211901 |
| H  | -7.257339 | -1.538045 | 2.063300  |
| H  | -6.136509 | 0.533088  | 2.889943  |
| H  | -4.477931 | 1.707306  | 1.463342  |
| O  | -4.258809 | 1.910193  | -2.179746 |
| O  | -2.699021 | 0.167301  | -1.858105 |
| H  | -5.138792 | 2.169897  | -1.876347 |
| H  | -2.680680 | 0.406345  | -2.797330 |

## 6.4 Ni/Zn mechanism via a non-redox pathway

### 6.4 Ni/Zn mechanism via a non-redox pathway

A  
 SCF Energy: -4781.74641788  
 ZPE-corrected Energy: -4781.51348  
 $\Delta U$ : -4781.49234  
 $\Delta H$ : -4781.49140  
 $\Delta G$ : -4781.56605  
 $S^2$  before (0.4796) and after higher multiplicity projection (0.0032)  
 Num. Imaginary Frequencies: 0

|    |           |           |           |
|----|-----------|-----------|-----------|
| Ni | -0.175386 | -0.081391 | -0.675307 |
| Cl | -1.642155 | -1.755293 | -0.966166 |
| Cl | -1.718925 | 1.399447  | -1.347446 |
| N  | 1.326230  | -1.292141 | -0.217872 |
| C  | 1.293949  | -2.627284 | -0.215989 |
| C  | 2.409028  | -3.397037 | 0.098367  |
| C  | 3.596698  | -2.751826 | 0.422873  |
| C  | 3.629717  | -1.360790 | 0.426359  |
| C  | 2.473749  | -0.655547 | 0.101854  |
| C  | 2.387492  | 0.810898  | 0.081372  |
| H  | 0.329550  | -3.077687 | -0.474996 |
| H  | 2.335164  | -4.488062 | 0.085407  |
| H  | 4.495797  | -3.323457 | 0.673784  |
| H  | 4.552671  | -0.832290 | 0.678845  |
| C  | 3.439933  | 1.654842  | 0.427328  |
| C  | 3.244560  | 3.031701  | 0.386464  |
| C  | 2.002382  | 3.524877  | 0.003926  |
| C  | 0.997925  | 2.622149  | -0.328154 |
| N  | 1.186786  | 1.300306  | -0.295020 |
| H  | 4.405851  | 1.244187  | 0.732488  |
| H  | 4.059635  | 3.710722  | 0.655988  |
| H  | 1.801120  | 4.598947  | -0.039063 |
| H  | -0.001624 | 2.948841  | -0.635939 |
| Zn | -2.654113 | 0.020509  | 0.942608  |
| C  | -4.560136 | -0.082212 | 0.458366  |
| H  | -5.118655 | 0.831248  | 0.745429  |
| H  | -4.649017 | -0.200604 | -0.639599 |
| H  | -5.073002 | -0.943096 | 0.932381  |
| C  | -1.052746 | 0.266324  | 2.095698  |
| H  | -1.379709 | 0.182869  | 3.152768  |
| H  | -0.248432 | -0.484869 | 1.958489  |
| H  | -0.603203 | 1.272617  | 1.975222  |

B  
 SCF Energy: -4781.76118596  
 ZPE-corrected Energy: -4781.52636  
 $\Delta U$ : -4781.50599  
 $\Delta H$ : -4781.50504  
 $\Delta G$ : -4781.57686  
 Num. Imaginary Frequencies: 0

|    |           |           |           |
|----|-----------|-----------|-----------|
| N  | 1.233386  | -1.367251 | -0.381241 |
| C  | 1.381962  | -2.694348 | -0.295396 |
| C  | 2.507417  | -3.297673 | 0.252597  |
| C  | 3.528003  | -2.490128 | 0.740071  |
| C  | 3.385861  | -1.110659 | 0.649218  |
| C  | 2.231932  | -0.574806 | 0.081123  |
| H  | 0.564165  | -3.307854 | -0.681438 |
| H  | 2.569221  | -4.388807 | 0.292240  |
| H  | 4.429184  | -2.925336 | 1.183276  |
| H  | 4.177204  | -0.451845 | 1.015865  |
| C  | 2.012489  | 0.869578  | -0.078953 |
| N  | 0.874995  | 1.189834  | -0.720944 |
| C  | 0.579041  | 2.472948  | -0.922157 |
| C  | 1.405533  | 3.507084  | -0.494611 |
| C  | 2.577346  | 3.185288  | 0.181240  |
| C  | 2.888724  | 1.845760  | 0.391582  |
| Ni | -0.312751 | -0.399346 | -1.027825 |
| H  | -0.372831 | 2.670440  | -1.427916 |
| H  | 1.121956  | 4.546543  | -0.683836 |
| H  | 3.248292  | 3.969671  | 0.546202  |
| H  | 3.803117  | 1.572352  | 0.924733  |
| Cl | -2.081827 | 0.844559  | -1.516167 |
| Cl | -0.721844 | 1.103876  | 2.078744  |
| Zn | -2.191905 | -0.066905 | 0.862879  |
| C  | -3.768565 | -1.224825 | 1.067069  |
| C  | -1.302586 | -1.992738 | -1.396963 |
| H  | -4.345347 | -1.239381 | 0.122188  |
| H  | -3.472059 | -2.265785 | 1.300723  |
| H  | -4.435747 | -0.871309 | 1.876539  |
| H  | -0.719763 | -2.526090 | -2.178505 |
| H  | -2.317005 | -1.799830 | -1.787695 |
| H  | -1.395417 | -2.648277 | -0.507071 |

C  
 SCF Energy: -2502.68823929  
 ZPE-corrected Energy: -2502.49036  
 $\Delta U$ : -2502.47674  
 $\Delta H$ : -2502.47580  
 $\Delta G$ : -2502.53112  
 Num. Imaginary Frequencies: 0

|    |           |           |           |
|----|-----------|-----------|-----------|
| N  | -1.243291 | -0.616126 | 0.000407  |
| C  | -2.311898 | -1.422861 | 0.000736  |
| C  | -3.620124 | -0.954560 | 0.000382  |
| C  | -3.840266 | 0.418047  | -0.000446 |
| C  | -2.739233 | 1.266053  | -0.000780 |
| C  | -1.455140 | 0.723852  | -0.000261 |
| H  | -2.114337 | -2.497692 | 0.001164  |
| H  | -4.448520 | -1.668858 | 0.000718  |
| H  | -4.855152 | 0.827897  | -0.000844 |
| H  | -2.880414 | 2.350050  | -0.001456 |
| C  | -0.236360 | 1.544945  | -0.000220 |
| N  | 0.907612  | 0.833349  | 0.000196  |
| C  | 2.076053  | 1.477821  | 0.000658  |
| C  | 2.163859  | 2.866237  | 0.000615  |
| C  | 0.987187  | 3.608794  | 0.000071  |
| C  | -0.232495 | 2.939638  | -0.000334 |
| Ni | 0.620593  | -1.148616 | 0.000169  |
| H  | 2.962662  | 0.831179  | 0.000899  |
| H  | 3.144644  | 3.351113  | 0.000989  |
| H  | 1.013738  | 4.703327  | -0.000015 |
| H  | -1.168627 | 3.504560  | -0.000706 |
| Cl | 2.763468  | -1.604586 | -0.000726 |
| C  | 0.210877  | -3.016622 | 0.000016  |
| H  | 1.105832  | -3.662874 | -0.000272 |
| H  | -0.389977 | -3.264167 | 0.901421  |
| H  | -0.390408 | -3.263952 | -0.901139 |

## 6.4 Ni/Zn mechanism via a non-redox pathway

|                                   |           |           |                                   |    |           |           |           |
|-----------------------------------|-----------|-----------|-----------------------------------|----|-----------|-----------|-----------|
| D1                                |           |           | E1                                |    |           |           |           |
| SCF Energy: -2943.46818547        |           |           | SCF Energy: -2943.52423314        |    |           |           |           |
| ZPE-corrected Energy: -2943.09277 |           |           | ZPE-corrected Energy: -2943.14561 |    |           |           |           |
| $\Delta U$ : -2943.06866          |           |           | $\Delta U$ : -2943.12207          |    |           |           |           |
| $\Delta H$ : -2943.06772          |           |           | $\Delta H$ : -2943.12113          |    |           |           |           |
| $\Delta G$ : -2943.14545          |           |           | $\Delta G$ : -2943.19834          |    |           |           |           |
| Num. Imaginary Frequencies: 0     |           |           | Num. Imaginary Frequencies: 0     |    |           |           |           |
| Ni                                | 1.534395  | -0.219272 | -0.379645                         | Ni | 0.848697  | -1.015032 | 0.473609  |
| N                                 | 0.316602  | -0.663608 | 1.163247                          | N  | 1.854914  | 0.371876  | -0.482406 |
| C                                 | 0.211430  | -1.873060 | 1.711624                          | C  | 2.865402  | 0.068767  | -1.296479 |
| C                                 | -0.643419 | -2.134248 | 2.776927                          | C  | 3.612816  | 1.042688  | -1.948581 |
| C                                 | -1.399874 | -1.083200 | 3.290814                          | C  | 3.294407  | 2.379480  | -1.722009 |
| C                                 | -1.264287 | 0.185259  | 2.737623                          | C  | 2.249291  | 2.691076  | -0.859105 |
| C                                 | -0.385597 | 0.367080  | 1.666190                          | C  | 1.536130  | 1.656564  | -0.250579 |
| C                                 | -0.122071 | 1.673710  | 1.033584                          | H  | 3.087410  | -0.999699 | -1.411470 |
| H                                 | 0.845220  | -2.654853 | 1.274828                          | H  | 4.431109  | 0.753625  | -2.614569 |
| H                                 | -0.708242 | -3.143117 | 3.194557                          | H  | 3.862894  | 3.179267  | -2.208000 |
| H                                 | -2.082992 | -1.245467 | 4.131008                          | H  | 2.000651  | 3.736049  | -0.653314 |
| H                                 | -1.825297 | 1.028163  | 3.150789                          | C  | 0.408502  | 1.878185  | 0.680215  |
| N                                 | 0.907159  | 1.692438  | 0.163887                          | N  | -0.025324 | 0.786203  | 1.328347  |
| C                                 | 1.219369  | 2.835482  | -0.441949                         | C  | -1.059800 | 0.887299  | 2.158180  |
| C                                 | 0.531777  | 4.023833  | -0.214982                         | C  | -1.721939 | 2.088505  | 2.398487  |
| C                                 | -0.537884 | 4.010875  | 0.673913                          | C  | -1.273484 | 3.228650  | 1.735231  |
| C                                 | -0.869488 | 2.819332  | 1.309404                          | C  | -0.193474 | 3.125527  | 0.864688  |
| H                                 | 2.060173  | 2.802842  | -1.145473                         | H  | -1.376300 | -0.037368 | 2.661609  |
| H                                 | 0.832194  | 4.938129  | -0.735357                         | H  | -2.567971 | 2.125169  | 3.091690  |
| H                                 | -1.112901 | 4.920941  | 0.873708                          | H  | -1.765087 | 4.195010  | 1.889731  |
| H                                 | -1.711208 | 2.783557  | 2.007324                          | H  | 0.158424  | 4.007216  | 0.321169  |
| Cl                                | 3.334614  | -0.948173 | 0.898078                          | Cl | 2.666259  | -1.577327 | 1.740429  |
| C                                 | 2.777384  | 0.386261  | -1.709052                         | C  | -0.041029 | -2.571706 | -0.278456 |
| C                                 | 0.140317  | -0.678100 | -1.806564                         | C  | -0.257853 | -2.505440 | 1.123255  |
| C                                 | 1.053919  | -1.681531 | -1.520947                         | C  | -0.473194 | -1.429261 | -1.007984 |
| C                                 | 1.576855  | -2.886225 | -1.662129                         | H  | 0.224425  | -3.259128 | 1.761374  |
| H                                 | 2.448957  | -3.184575 | -1.061119                         | H  | -1.172115 | -2.057862 | 1.544010  |
| H                                 | 1.171570  | -3.616117 | -2.381069                         | N  | -1.763180 | -0.832653 | -0.856395 |
| N                                 | -1.213145 | -0.698724 | -1.389814                         | H  | -0.039947 | -1.275801 | -2.011341 |
| C                                 | -1.919953 | 0.477129  | -1.525167                         | C  | -2.921781 | -1.706753 | -0.622433 |
| C                                 | -3.369633 | 0.476903  | -1.098346                         | C  | -4.125355 | -0.938154 | -0.126954 |
| C                                 | -4.035162 | -0.885540 | -1.056184                         | C  | -4.446775 | 0.185960  | -1.092062 |
| C                                 | -3.128731 | -1.847946 | -0.313840                         | C  | -3.252582 | 1.117586  | -1.182626 |
| C                                 | -1.814969 | -1.990263 | -1.048613                         | C  | -1.903601 | 0.448798  | -1.332126 |
| O                                 | -1.385162 | 1.497673  | -1.929522                         | O  | -0.956767 | 1.066726  | -1.798506 |
| H                                 | -3.381923 | 0.933508  | -0.085262                         | H  | -2.636440 | -2.483196 | 0.103407  |
| H                                 | -3.893922 | 1.192859  | -1.755742                         | H  | -3.170671 | -2.234463 | -1.568953 |
| H                                 | -4.204855 | -1.259270 | -2.086558                         | H  | -4.975169 | -1.636484 | -0.018114 |
| H                                 | -5.027949 | -0.811902 | -0.577135                         | H  | -3.911949 | -0.524540 | 0.881258  |
| H                                 | -3.586523 | -2.848788 | -0.214492                         | H  | -4.668770 | -0.244319 | -2.089947 |
| H                                 | -2.947340 | -1.474303 | 0.716323                          | H  | -5.347320 | 0.745764  | -0.780831 |
| H                                 | -1.958944 | -2.569850 | -1.985686                         | H  | -3.172694 | 1.720213  | -0.251838 |
| H                                 | -1.089888 | -2.559226 | -0.440882                         | H  | -3.340186 | 1.847304  | -2.006667 |
| H                                 | 0.319557  | 0.014187  | -2.640314                         | C  | 0.886063  | -3.579657 | -0.887043 |
| H                                 | 3.402819  | -0.446902 | -2.075139                         | H  | 0.343104  | -4.501632 | -1.175865 |
| H                                 | 2.263755  | 0.878809  | -2.558730                         | H  | 1.365253  | -3.182412 | -1.801990 |
| H                                 | 3.423339  | 1.113312  | -1.181751                         | H  | 1.680219  | -3.857735 | -0.170208 |



## 6.4 Ni/Zn mechanism via a non-redox pathway

F1.3  
 SCF Energy: -5376.22167373  
 ZPE-corrected Energy: -5375.74466  
 $\Delta U$ : -5375.71163  
 $\Delta H$ : -5375.71069  
 $\Delta G$ : -5375.80983  
 $S^2$  before (2.0084) and after higher multiplicity projection (2.0000)  
 Num. Imaginary Frequencies: 1

|    |           |           |           |
|----|-----------|-----------|-----------|
| Ni | -1.503409 | 1.350407  | 0.518493  |
| N  | -3.279373 | 0.562674  | 0.019991  |
| C  | -4.208542 | 1.192087  | -0.695122 |
| C  | -5.419913 | 0.587257  | -1.011276 |
| C  | -5.656349 | -0.702032 | -0.541102 |
| C  | -4.681350 | -1.349081 | 0.211774  |
| C  | -3.482101 | -0.688151 | 0.466174  |
| H  | -3.969455 | 2.216062  | -1.009896 |
| H  | -6.163421 | 1.124438  | -1.606584 |
| H  | -6.602027 | -1.207983 | -0.760432 |
| H  | -4.854546 | -2.362373 | 0.583802  |
| C  | -2.350398 | -1.278750 | 1.209872  |
| N  | -1.252933 | -0.497847 | 1.311460  |
| C  | -0.182462 | -0.929429 | 1.980089  |
| C  | -0.139952 | -2.185668 | 2.576458  |
| C  | -1.259106 | -3.005097 | 2.475567  |
| C  | -2.379257 | -2.547597 | 1.784094  |
| H  | 0.689945  | -0.264711 | 2.041732  |
| H  | 0.768876  | -2.496639 | 3.100748  |
| H  | -1.267499 | -4.000245 | 2.931689  |
| H  | -3.268381 | -3.178098 | 1.700249  |
| Cl | -2.020253 | 3.400587  | 1.166300  |
| C  | 0.082670  | 1.711637  | -1.074187 |
| C  | 1.210803  | 1.729025  | -0.078911 |
| C  | -0.535069 | 0.607905  | -1.615339 |
| H  | 0.885334  | 2.414353  | 0.737291  |
| H  | 1.389757  | 0.738934  | 0.377554  |
| N  | -0.143078 | -0.726468 | -1.594853 |
| H  | -1.413905 | 0.782352  | -2.255960 |
| C  | 1.262830  | -1.143452 | -1.752250 |
| C  | 1.579667  | -2.357841 | -0.894243 |
| C  | 0.453518  | -3.401041 | -0.953175 |
| C  | -0.567447 | -3.076751 | -2.041614 |
| C  | -1.109383 | -1.679455 | -1.902242 |
| O  | -2.285172 | -1.391871 | -2.028362 |
| H  | 1.927188  | -0.288982 | -1.533757 |
| H  | 1.417050  | -1.385125 | -2.823331 |
| H  | 2.535830  | -2.780344 | -1.256541 |
| H  | 1.766517  | -2.037159 | 0.150257  |
| H  | 0.854056  | -4.416698 | -1.118428 |
| H  | -0.075057 | -3.440694 | 0.018518  |
| H  | -1.428316 | -3.765956 | -2.026037 |
| H  | -0.102453 | -3.168776 | -3.044603 |
| C  | -0.292297 | 3.045439  | -1.665110 |
| C  | 2.599451  | 2.238475  | -0.584371 |
| O  | 3.352129  | 1.227517  | -1.121740 |
| H  | 2.389266  | 3.004577  | -1.373988 |
| C  | 3.318182  | 2.959711  | 0.551077  |
| H  | 3.454409  | 2.269510  | 1.407591  |
| H  | 4.317785  | 3.284588  | 0.204620  |
| H  | 2.764632  | 3.852853  | 0.901926  |
| Zn | 4.260669  | -0.109223 | -0.099786 |
| C  | 5.746387  | -1.263377 | -0.717409 |
| Cl | 3.284947  | -0.456032 | 1.999557  |
| H  | 0.383069  | 3.272510  | -2.514107 |
| H  | -1.326294 | 3.050040  | -2.058535 |
| H  | -0.196476 | 3.861459  | -0.929030 |
| H  | 5.486634  | -2.336254 | -0.619261 |
| H  | 6.002798  | -1.076957 | -1.778724 |
| H  | 6.662987  | -1.093407 | -0.118444 |

F1  
 SCF Energy: -5376.20463059  
 ZPE-corrected Energy: -5375.72744  
 $\Delta U$ : -5375.69362  
 $\Delta H$ : -5375.69267  
 $\Delta G$ : -5375.79306  
 $S^2$  before (0.9127) and after higher multiplicity projection (0.0259)  
 Num. Imaginary Frequencies: 0

|    |           |           |           |
|----|-----------|-----------|-----------|
| Ni | -1.548221 | 1.297456  | 0.566238  |
| N  | -3.317656 | 0.562223  | 0.094304  |
| C  | -4.246660 | 1.216513  | -0.599996 |
| C  | -5.450625 | 0.615042  | -0.949586 |
| C  | -5.681895 | -0.694999 | -0.538362 |
| C  | -4.704997 | -1.369375 | 0.187722  |
| C  | -3.511987 | -0.712961 | 0.475406  |
| H  | -4.013524 | 2.254528  | -0.865825 |
| H  | -6.193657 | 1.173054  | -1.526015 |
| H  | -6.623004 | -1.196558 | -0.785397 |
| H  | -4.868083 | -2.401620 | 0.509084  |
| C  | -2.371379 | -1.325410 | 1.178606  |
| N  | -1.271812 | -0.544196 | 1.269637  |
| C  | -0.185934 | -0.986129 | 1.906443  |
| C  | -0.131707 | -2.253137 | 2.478583  |
| C  | -1.250754 | -3.073570 | 2.384566  |
| C  | -2.385863 | -2.605482 | 1.725666  |
| H  | 0.687013  | -0.321870 | 1.965050  |
| H  | 0.786734  | -2.572210 | 2.980565  |
| H  | -1.247426 | -4.076816 | 2.822510  |
| H  | -3.277823 | -3.233067 | 1.649216  |
| Cl | -2.098989 | 3.370439  | 1.030772  |
| C  | 0.109197  | 1.744224  | -1.040696 |
| C  | 1.214464  | 1.740779  | -0.020746 |
| C  | -0.501916 | 0.655047  | -1.608400 |
| H  | 0.863565  | 2.398062  | 0.807499  |
| H  | 1.394454  | 0.738082  | 0.406347  |
| N  | -0.106282 | -0.683406 | -1.600128 |
| H  | -1.370014 | 0.840908  | -2.260851 |
| C  | 1.299179  | -1.085640 | -1.796437 |
| C  | 1.640490  | -2.322537 | -0.980259 |
| C  | 0.522217  | -3.374025 | -1.046198 |
| C  | -0.529737 | -3.022719 | -2.095741 |
| C  | -1.072529 | -1.631809 | -1.903436 |
| O  | -2.254376 | -1.348061 | -1.991109 |
| H  | 1.960135  | -0.233920 | -1.556844 |
| H  | 1.438964  | -1.292152 | -2.877217 |
| H  | 2.593378  | -2.726650 | -1.371208 |
| H  | 1.843374  | -2.028752 | 0.069229  |
| H  | 0.927222  | -4.379595 | -1.256812 |
| H  | 0.019813  | -3.452448 | -0.062822 |
| H  | -1.387024 | -3.716412 | -2.076658 |
| H  | -0.091386 | -3.083572 | -3.113163 |
| C  | -0.241859 | 3.087298  | -1.621507 |
| C  | 2.606142  | 2.277228  | -0.477481 |
| O  | 3.371190  | 1.295180  | -1.052773 |
| H  | 2.408601  | 3.081433  | -1.231536 |
| C  | 3.303960  | 2.943424  | 0.703787  |
| H  | 3.419900  | 2.215405  | 1.531453  |
| H  | 4.311539  | 3.280555  | 0.393998  |
| H  | 2.745488  | 3.821607  | 1.083495  |
| Zn | 4.282442  | -0.068934 | -0.075058 |
| C  | 5.774237  | -1.200437 | -0.722637 |
| Cl | 3.275505  | -0.547376 | 1.983758  |
| H  | 0.456440  | 3.318343  | -2.450830 |
| H  | -1.265711 | 3.105171  | -2.038904 |
| H  | -0.156955 | 3.894753  | -0.874737 |
| H  | 5.529322  | -2.276447 | -0.620391 |
| H  | 6.007699  | -1.009975 | -1.788593 |
| H  | 6.700603  | -1.019880 | -0.141998 |

## 6.4 Ni/Zn mechanism via a non-redox pathway

TS AB.3  
 SCF Energy: -4781.75483894  
 ZPE-corrected Energy: 0  
 $\Delta U$ : 0  
 $\Delta H$ : 0  
 $\Delta G$ : 0  
 $S^2$  before (2.0071) and after higher multiplicity projection (2.0000)  
 Num. Imaginary Frequencies: 0

|    |           |           |           |
|----|-----------|-----------|-----------|
| N  | 1.546755  | -1.271820 | 0.039535  |
| C  | 1.661127  | -2.596809 | 0.107258  |
| C  | 2.896225  | -3.238392 | 0.103680  |
| C  | 4.044335  | -2.457240 | 0.019850  |
| C  | 3.923509  | -1.071960 | -0.050570 |
| C  | 2.650233  | -0.503479 | -0.034768 |
| H  | 0.717509  | -3.154869 | 0.162712  |
| H  | 2.949774  | -4.329204 | 0.163741  |
| H  | 5.036113  | -2.920910 | 0.010092  |
| H  | 4.818370  | -0.447338 | -0.116304 |
| C  | 2.412061  | 0.958350  | -0.082317 |
| N  | 1.122271  | 1.333777  | -0.066315 |
| C  | 0.797992  | 2.624490  | -0.058807 |
| C  | 1.758068  | 3.630413  | -0.091120 |
| C  | 3.098991  | 3.258737  | -0.127795 |
| C  | 3.434302  | 1.907921  | -0.118013 |
| Ni | -0.295312 | -0.187151 | -0.081873 |
| H  | -0.274299 | 2.851400  | -0.012459 |
| H  | 1.455146  | 4.681375  | -0.086461 |
| H  | 3.887479  | 4.017791  | -0.156290 |
| H  | 4.484839  | 1.605451  | -0.132120 |
| C  | -1.354769 | 0.643366  | -1.726403 |
| Zn | -2.803882 | 0.079738  | -0.167937 |
| C  | -4.758520 | 0.287695  | -0.234996 |
| Cl | -1.689098 | -2.148399 | -0.093341 |
| H  | -1.439621 | 1.745447  | -1.794086 |
| H  | -0.412542 | 0.359760  | -2.243687 |
| H  | -2.142353 | 0.200585  | -2.374440 |
| Cl | -1.445882 | 0.745881  | 1.776169  |
| H  | -5.045827 | 1.355512  | -0.279584 |
| H  | -5.181949 | -0.212883 | -1.127278 |
| H  | -5.237314 | -0.153488 | 0.660124  |

TS AB  
 SCF Energy: -4781.73966616  
 ZPE-corrected Energy: 0  
 $\Delta U$ : 0  
 $\Delta H$ : 0  
 $\Delta G$ : 0  
 $S^2$  before (0.9124) and after higher multiplicity projection (0.0205)  
 Num. Imaginary Frequencies: 0

|    |           |           |           |
|----|-----------|-----------|-----------|
| N  | 1.516331  | -1.264076 | 0.086320  |
| C  | 1.617376  | -2.591144 | 0.080067  |
| C  | 2.844178  | -3.239367 | -0.031753 |
| C  | 3.994005  | -2.461511 | -0.132884 |
| C  | 3.883322  | -1.073368 | -0.131959 |
| C  | 2.616163  | -0.500001 | -0.025534 |
| H  | 0.669292  | -3.139057 | 0.169221  |
| H  | 2.892311  | -4.332192 | -0.035702 |
| H  | 4.979544  | -2.931103 | -0.216355 |
| H  | 4.779288  | -0.452705 | -0.218925 |
| C  | 2.367658  | 0.958143  | -0.043491 |
| N  | 1.074495  | 1.329195  | 0.038504  |
| C  | 0.748785  | 2.621510  | -0.003552 |
| C  | 1.703927  | 3.625395  | -0.120266 |
| C  | 3.044198  | 3.258845  | -0.192369 |
| C  | 3.381739  | 1.909466  | -0.155791 |
| Ni | -0.279408 | -0.174562 | 0.193917  |
| H  | -0.320531 | 2.852002  | 0.079160  |
| H  | 1.394399  | 4.673995  | -0.150362 |
| H  | 3.828093  | 4.018182  | -0.278506 |
| H  | 4.430249  | 1.605284  | -0.213200 |
| C  | -0.923426 | 0.088230  | -1.764424 |
| Zn | -2.671908 | -0.033056 | -0.402659 |
| C  | -4.583998 | 0.049004  | -0.845046 |
| Cl | -1.641476 | -2.024172 | 0.613691  |
| H  | -1.007401 | 1.153147  | -2.060913 |
| H  | 0.071405  | -0.256734 | -2.107768 |
| H  | -1.655716 | -0.509940 | -2.348825 |
| Cl | -1.856387 | 1.240287  | 1.509305  |
| H  | -4.892438 | 1.078023  | -1.107063 |
| H  | -4.853990 | -0.635764 | -1.669836 |
| H  | -5.169527 | -0.244709 | 0.046480  |

## 6.4 Ni/Zn mechanism via a non-redox pathway

### TS D1E1

SCF Energy: -2943.44606498  
 ZPE-corrected Energy: -2943.07062  
 $\Delta U$ : -2943.04726  
 $\Delta H$ : -2943.04632  
 $\Delta G$ : -2943.12238

Num. Imaginary Frequencies: 1

Imaginary Frequency: -392.5909

|    |           |           |           |
|----|-----------|-----------|-----------|
| Ni | 1.536662  | -0.443754 | -0.206103 |
| N  | 0.233404  | -0.376447 | 1.295663  |
| C  | 0.007552  | -1.460167 | 2.039296  |
| C  | -0.897747 | -1.463175 | 3.093510  |
| C  | -1.571751 | -0.279083 | 3.386851  |
| C  | -1.311453 | 0.855915  | 2.627882  |
| C  | -0.393513 | 0.778177  | 1.575301  |
| C  | -0.025906 | 1.937422  | 0.730340  |
| H  | 0.589134  | -2.353259 | 1.775333  |
| H  | -1.063911 | -2.375614 | 3.673490  |
| H  | -2.287649 | -0.234414 | 4.214202  |
| H  | -1.805041 | 1.801836  | 2.868225  |
| N  | 1.054674  | 1.766749  | -0.044095 |
| C  | 1.438245  | 2.750266  | -0.848967 |
| C  | 0.777517  | 3.974996  | -0.916731 |
| C  | -0.338806 | 4.164109  | -0.107257 |
| C  | -0.750972 | 3.131573  | 0.728467  |
| H  | 2.323117  | 2.557974  | -1.473737 |
| H  | 1.133949  | 4.759554  | -1.591344 |
| H  | -0.893249 | 5.108267  | -0.130382 |
| H  | -1.639953 | 3.254166  | 1.354718  |
| Cl | 3.235318  | -0.884983 | 1.258653  |
| C  | 2.779147  | -0.684385 | -1.761877 |
| C  | 0.190649  | -0.692817 | -1.639098 |
| C  | 1.175721  | -1.710134 | -1.533884 |
| C  | 1.344141  | -3.035935 | -1.648153 |
| H  | 2.241604  | -3.520871 | -1.238283 |
| H  | 0.614471  | -3.666332 | -2.174855 |
| N  | -1.178314 | -0.825546 | -1.305214 |
| C  | -1.974335 | 0.278358  | -1.529287 |
| C  | -3.427064 | 0.197704  | -1.120361 |
| C  | -3.983685 | -1.201691 | -0.946315 |
| C  | -3.005845 | -2.009025 | -0.116262 |
| C  | -1.683871 | -2.118495 | -0.841497 |
| O  | -1.521540 | 1.312713  | -1.997482 |
| H  | -3.491604 | 0.752257  | -0.159063 |
| H  | -3.995359 | 0.800513  | -1.850796 |
| H  | -4.116019 | -1.686412 | -1.935160 |
| H  | -4.982241 | -1.161923 | -0.475166 |
| H  | -3.381075 | -3.028679 | 0.085735  |
| H  | -2.856967 | -1.519844 | 0.869809  |
| H  | -1.787841 | -2.795920 | -1.715575 |
| H  | -0.917726 | -2.569962 | -0.188144 |
| H  | 0.346050  | 0.115253  | -2.368284 |
| H  | 3.162169  | 0.295783  | -1.395540 |
| H  | 3.562987  | -1.442608 | -1.616715 |
| H  | 2.534054  | -0.556603 | -2.831040 |

### TS DE

SCF Energy: -2943.44260696  
 ZPE-corrected Energy: -2943.06770  
 $\Delta U$ : -2943.04397  
 $\Delta H$ : -2943.04303  
 $\Delta G$ : -2943.12105

Num. Imaginary Frequencies: 1

Imaginary Frequency: -377.9460

|    |           |           |           |
|----|-----------|-----------|-----------|
| Ni | -0.761894 | -1.126264 | 0.456480  |
| N  | -1.890131 | 0.151313  | -0.540004 |
| C  | -2.844984 | -0.298233 | -1.352891 |
| C  | -3.738537 | 0.554041  | -1.990665 |
| C  | -3.628397 | 1.921661  | -1.750659 |
| C  | -2.631861 | 2.383583  | -0.897885 |
| C  | -1.762087 | 1.466427  | -0.303268 |
| C  | -0.652100 | 1.857258  | 0.594396  |
| H  | -2.892079 | -1.387222 | -1.488208 |
| H  | -4.506615 | 0.148937  | -2.655897 |
| H  | -4.318292 | 2.628746  | -2.222939 |
| H  | -2.540239 | 3.453399  | -0.689973 |
| N  | -0.065689 | 0.853817  | 1.259196  |
| C  | 0.984385  | 1.106331  | 2.032372  |
| C  | 1.509404  | 2.385871  | 2.200151  |
| C  | 0.891348  | 3.439369  | 1.530227  |
| C  | -0.206474 | 3.176010  | 0.718056  |
| H  | 1.431019  | 0.244834  | 2.552209  |
| H  | 2.378778  | 2.548774  | 2.844698  |
| H  | 1.266769  | 4.463128  | 1.632381  |
| H  | -0.687350 | 3.989110  | 0.166410  |
| Cl | -2.554767 | -1.553524 | 1.834475  |
| C  | 0.311431  | -2.508435 | 1.430022  |
| C  | 0.536687  | -1.216696 | -1.010567 |
| C  | 0.107814  | -2.480613 | -0.532315 |
| C  | -0.157059 | -3.698684 | -1.016756 |
| H  | -0.725886 | -4.440611 | -0.439312 |
| H  | 0.210234  | -3.996871 | -2.008910 |
| N  | 1.837998  | -0.666632 | -0.859506 |
| C  | 2.001009  | 0.635277  | -1.280543 |
| C  | 3.384210  | 1.245204  | -1.218362 |
| C  | 4.408854  | 0.494122  | -0.390181 |
| C  | 4.288929  | -0.985129 | -0.699089 |
| C  | 2.918328  | -1.468881 | -0.281206 |
| O  | 1.070249  | 1.279810  | -1.742693 |
| H  | 3.722857  | 1.311755  | -2.273102 |
| H  | 3.248711  | 2.291122  | -0.886871 |
| H  | 4.224528  | 0.658119  | 0.691751  |
| H  | 5.424329  | 0.875767  | -0.599745 |
| H  | 5.050995  | -1.580049 | -0.163861 |
| H  | 4.441613  | -1.159535 | -1.783801 |
| H  | 2.854019  | -1.437361 | 0.826414  |
| H  | 2.755165  | -2.518349 | -0.587813 |
| H  | 0.040659  | -0.831040 | -1.912147 |
| H  | 0.274047  | -1.781560 | 2.271242  |
| H  | -0.310941 | -3.377564 | 1.693791  |
| H  | 1.359112  | -2.817090 | 1.304888  |

## 6.4 Ni/Zn mechanism via a non-redox pathway

TS EIF1.3  
 SCF Energy: -5376.19417916  
 ZPE-corrected Energy: -5375.72195  
 $\Delta U$ : -5375.68724  
 $\Delta H$ : -5375.68630  
 $\Delta G$ : -5375.79092  
 $S^2$  before (2.0279) and after higher multiplicity projection (2.0003)

Num. Imaginary Frequencies: 1

Imaginary Frequency: -311.3118

|    |           |           |           |
|----|-----------|-----------|-----------|
| Ni | -1.499036 | 1.285638  | 0.342179  |
| N  | -3.380414 | 0.569189  | 0.052815  |
| C  | -4.326595 | 1.225454  | -0.610920 |
| C  | -5.550219 | 0.640086  | -0.919723 |
| C  | -5.778872 | -0.667715 | -0.498147 |
| C  | -4.787357 | -1.343930 | 0.205591  |
| C  | -3.579649 | -0.693128 | 0.456147  |
| H  | -4.090133 | 2.261197  | -0.889169 |
| H  | -6.307652 | 1.202966  | -1.472930 |
| H  | -6.730690 | -1.163528 | -0.715263 |
| H  | -4.955739 | -2.370803 | 0.541554  |
| C  | -2.438588 | -1.309561 | 1.165889  |
| N  | -1.326845 | -0.549338 | 1.254179  |
| C  | -0.264512 | -1.011760 | 1.914118  |
| C  | -0.239541 | -2.269737 | 2.508097  |
| C  | -1.372576 | -3.070580 | 2.408445  |
| C  | -2.487139 | -2.584034 | 1.730972  |
| H  | 0.615814  | -0.359384 | 1.974553  |
| H  | 0.662109  | -2.602171 | 3.032057  |
| H  | -1.396059 | -4.068593 | 2.858084  |
| H  | -3.390641 | -3.194749 | 1.653356  |
| Cl | -2.065100 | 3.230980  | 1.367711  |
| C  | 0.029338  | 1.826712  | -1.028582 |
| C  | 0.958142  | 1.766640  | 0.043377  |
| C  | -0.636160 | 0.737121  | -1.613050 |
| H  | 0.981065  | 2.635990  | 0.712581  |
| H  | 1.290295  | 0.810508  | 0.467875  |
| N  | -0.195259 | -0.606771 | -1.628450 |
| H  | -1.383554 | 0.959748  | -2.391099 |
| C  | 1.219674  | -0.965202 | -1.796709 |
| C  | 1.584899  | -2.194737 | -0.976535 |
| C  | 0.496644  | -3.275516 | -1.054077 |
| C  | -0.541232 | -2.953713 | -2.124617 |
| C  | -1.123242 | -1.573820 | -1.943121 |
| O  | -2.314015 | -1.329119 | -2.064985 |
| H  | 1.848064  | -0.104334 | -1.522265 |
| H  | 1.408999  | -1.154712 | -2.874001 |
| H  | 2.555277  | -2.573174 | -1.351304 |
| H  | 1.760378  | -1.897176 | 0.076296  |
| H  | 0.932890  | -4.271910 | -1.246730 |
| H  | -0.022807 | -3.355078 | -0.079218 |
| H  | -1.381258 | -3.668688 | -2.119390 |
| H  | -0.081314 | -3.008142 | -3.133231 |
| C  | -0.315307 | 3.188736  | -1.572779 |
| C  | 3.018508  | 2.271117  | -0.667827 |
| O  | 3.546541  | 1.189544  | -1.026706 |
| H  | 2.567408  | 2.904974  | -1.461679 |
| C  | 3.491844  | 2.978979  | 0.562504  |
| H  | 3.484377  | 2.293266  | 1.430329  |
| H  | 4.542713  | 3.287135  | 0.385476  |
| H  | 2.900762  | 3.882421  | 0.787446  |
| Zn | 4.441258  | -0.287814 | 0.065205  |
| C  | 5.915927  | -1.204407 | -0.858096 |
| Cl | 3.259014  | -0.416795 | 1.993282  |
| H  | 0.396242  | 3.453480  | -2.381049 |
| H  | -1.331368 | 3.216795  | -2.008702 |
| H  | -0.256217 | 3.964312  | -0.790301 |
| H  | 6.538810  | -1.798415 | -0.163257 |
| H  | 5.522824  | -1.893130 | -1.631303 |
| H  | 6.571633  | -0.470383 | -1.364791 |

TS EIF1  
 SCF Energy: -5376.18305563  
 ZPE-corrected Energy: -5375.71060  
 $\Delta U$ : -5375.67681  
 $\Delta H$ : -5375.67587  
 $\Delta G$ : -5375.77619  
 $S^2$  before (0.8906) and after higher multiplicity projection (0.0506)

Num. Imaginary Frequencies: 2

Imaginary Frequency: -466.2237

|    |           |           |           |
|----|-----------|-----------|-----------|
| Ni | -1.393314 | 1.245624  | 0.400228  |
| N  | -3.244727 | 0.595207  | 0.085789  |
| C  | -4.156231 | 1.292984  | -0.587089 |
| C  | -5.397854 | 0.758523  | -0.912943 |
| C  | -5.686486 | -0.540944 | -0.502181 |
| C  | -4.732039 | -1.260785 | 0.208593  |
| C  | -3.501769 | -0.662745 | 0.478097  |
| H  | -3.875067 | 2.320076  | -0.853169 |
| H  | -6.123993 | 1.355567  | -1.472147 |
| H  | -6.655226 | -0.995604 | -0.733712 |
| H  | -4.943668 | -2.282474 | 0.535954  |
| C  | -2.394100 | -1.326623 | 1.192777  |
| N  | -1.257014 | -0.605590 | 1.283837  |
| C  | -0.214110 | -1.107116 | 1.945455  |
| C  | -0.236530 | -2.366089 | 2.538304  |
| C  | -1.398045 | -3.125037 | 2.437354  |
| C  | -2.492710 | -2.598481 | 1.756760  |
| H  | 0.691055  | -0.489027 | 2.007182  |
| H  | 0.652177  | -2.730882 | 3.063011  |
| H  | -1.458789 | -4.121051 | 2.887885  |
| H  | -3.418481 | -3.174869 | 1.676489  |
| Cl | -1.983357 | 3.258722  | 1.309278  |
| C  | -0.025209 | 1.792196  | -1.090936 |
| C  | 0.856309  | 1.734153  | 0.043693  |
| C  | -0.626885 | 0.690036  | -1.693142 |
| H  | 0.784788  | 2.577502  | 0.743583  |
| H  | 1.192502  | 0.775050  | 0.460926  |
| N  | -0.193749 | -0.643860 | -1.680577 |
| H  | -1.423131 | 0.884130  | -2.427973 |
| C  | 1.224841  | -1.008532 | -1.808261 |
| C  | 1.565625  | -2.237534 | -0.977202 |
| C  | 0.466916  | -3.307079 | -1.058022 |
| C  | -0.546382 | -2.995119 | -2.155389 |
| C  | -1.126985 | -1.614033 | -1.994708 |
| O  | -2.313644 | -1.360032 | -2.119260 |
| H  | 1.846507  | -0.143182 | -1.527267 |
| H  | 1.434954  | -1.202700 | -2.880398 |
| H  | 2.533844  | -2.628805 | -1.343679 |
| H  | 1.740979  | -1.938563 | 0.074845  |
| H  | 0.896367  | -4.310942 | -1.224243 |
| H  | -0.072602 | -3.364694 | -0.092542 |
| H  | -1.387273 | -3.708720 | -2.162200 |
| H  | -0.062992 | -3.057753 | -3.152347 |
| C  | -0.362786 | 3.146301  | -1.651272 |
| C  | 2.793651  | 2.323057  | -0.498890 |
| O  | 3.393573  | 1.303495  | -0.952961 |
| H  | 2.391813  | 3.036658  | -1.251911 |
| C  | 3.248638  | 2.941663  | 0.790689  |
| H  | 3.251227  | 2.190271  | 1.601912  |
| H  | 4.292937  | 3.285244  | 0.645586  |
| H  | 2.636697  | 3.811778  | 1.083348  |
| Zn | 4.365932  | -0.198974 | 0.010460  |
| C  | 5.832817  | -1.054729 | -0.982464 |
| Cl | 3.262951  | -0.530853 | 1.967076  |
| H  | 0.386714  | 3.432959  | -2.416639 |
| H  | -1.351789 | 3.146860  | -2.146249 |
| H  | -0.372554 | 3.919123  | -0.864334 |
| H  | 6.479361  | -1.663600 | -0.322821 |
| H  | 5.432984  | -1.722256 | -1.770785 |
| H  | 6.467338  | -0.294518 | -1.477416 |

## 6.4 Ni/Zn mechanism via a non-redox pathway

|                                                                         |  |  |  |                                                                         |
|-------------------------------------------------------------------------|--|--|--|-------------------------------------------------------------------------|
|                                                                         |  |  |  | TS EF.3                                                                 |
|                                                                         |  |  |  | SCF Energy: -5376.19500948                                              |
|                                                                         |  |  |  | ZPE-corrected Energy: 0                                                 |
|                                                                         |  |  |  | $\Delta U$ : 0                                                          |
|                                                                         |  |  |  | $\Delta H$ : 0                                                          |
|                                                                         |  |  |  | $\Delta G$ : 0                                                          |
|                                                                         |  |  |  | $S^2$ before (2.0221) and after higher multiplicity projection (2.0002) |
|                                                                         |  |  |  | Num. Imaginary Frequencies: 0                                           |
|                                                                         |  |  |  | Ni -1.468547 -0.826384 1.186445                                         |
|                                                                         |  |  |  | N -2.807017 0.390084 0.271721                                           |
|                                                                         |  |  |  | C -3.307879 1.486680 0.835305                                           |
|                                                                         |  |  |  | C -4.084778 2.391304 0.120051                                           |
|                                                                         |  |  |  | C -4.349177 2.113298 -1.220033                                          |
|                                                                         |  |  |  | C -3.831759 0.958135 -1.797321                                          |
|                                                                         |  |  |  | C -3.041496 0.112503 -1.017946                                          |
|                                                                         |  |  |  | H -3.082456 1.625961 1.901231                                           |
|                                                                         |  |  |  | H -4.478373 3.288227 0.607169                                           |
|                                                                         |  |  |  | H -4.961237 2.796602 -1.817948                                          |
|                                                                         |  |  |  | H -4.031417 0.734066 -2.848761                                          |
|                                                                         |  |  |  | C -2.399325 -1.121941 -1.516753                                         |
|                                                                         |  |  |  | N -1.598669 -1.761935 -0.638787                                         |
|                                                                         |  |  |  | C -0.992548 -2.891074 -1.001714                                         |
|                                                                         |  |  |  | C -1.146652 -3.451219 -2.266352                                         |
|                                                                         |  |  |  | C -1.966838 -2.799414 -3.180115                                         |
|                                                                         |  |  |  | C -2.602535 -1.619927 -2.801809                                         |
|                                                                         |  |  |  | H -0.355771 -3.368656 -0.247645                                         |
|                                                                         |  |  |  | H -0.626853 -4.379286 -2.520914                                         |
|                                                                         |  |  |  | H -2.117144 -3.205015 -4.185923                                         |
|                                                                         |  |  |  | H -3.256729 -1.098377 -3.505801                                         |
|                                                                         |  |  |  | Cl -2.655273 -1.269569 3.070919                                         |
|                                                                         |  |  |  | C 0.457482 -0.281286 1.914267                                           |
|                                                                         |  |  |  | C 0.892187 -1.621857 1.964303                                           |
|                                                                         |  |  |  | C 0.321824 0.309391 0.653170                                            |
|                                                                         |  |  |  | H 0.788167 -2.194172 2.896592                                           |
|                                                                         |  |  |  | H 1.082211 -2.174891 1.033252                                           |
|                                                                         |  |  |  | N 0.285305 1.695348 0.385022                                            |
|                                                                         |  |  |  | H 0.581388 -0.294536 -0.227367                                          |
|                                                                         |  |  |  | C 0.978226 2.678763 1.225868                                            |
|                                                                         |  |  |  | C 1.969386 3.478438 0.399666                                            |
|                                                                         |  |  |  | C 1.293455 4.198999 -0.769347                                           |
|                                                                         |  |  |  | C -0.076781 3.584048 -1.083173                                          |
|                                                                         |  |  |  | C -0.133969 2.093411 -0.862985                                          |
|                                                                         |  |  |  | O -0.533654 1.304262 -1.707785                                          |
|                                                                         |  |  |  | H 1.524209 2.129776 2.004172                                            |
|                                                                         |  |  |  | H 0.243980 3.340924 1.729463                                            |
|                                                                         |  |  |  | H 2.496985 4.191377 1.059703                                            |
|                                                                         |  |  |  | H 2.739445 2.767631 0.039780                                            |
|                                                                         |  |  |  | H 1.153877 5.271500 -0.542366                                           |
|                                                                         |  |  |  | H 1.939923 4.156754 -1.665135                                           |
|                                                                         |  |  |  | H -0.398677 3.783957 -2.118279                                          |
|                                                                         |  |  |  | H -0.837740 4.034421 -0.413729                                          |
|                                                                         |  |  |  | C 0.265841 0.444149 3.219064                                            |
|                                                                         |  |  |  | C 3.086587 -0.949837 1.979590                                           |
|                                                                         |  |  |  | O 3.143243 -0.033364 1.124977                                           |
|                                                                         |  |  |  | H 2.925094 -0.649831 3.037633                                           |
|                                                                         |  |  |  | C 3.724202 -2.283894 1.771040                                           |
|                                                                         |  |  |  | H 3.573641 -2.630059 0.732721                                           |
|                                                                         |  |  |  | H 4.815740 -2.169910 1.939245                                           |
|                                                                         |  |  |  | H 3.350579 -3.037943 2.484600                                           |
|                                                                         |  |  |  | Zn 3.406993 -0.109024 -0.908416                                         |
|                                                                         |  |  |  | C 4.232422 1.433233 -1.804649                                           |
|                                                                         |  |  |  | Cl 2.317495 -2.003493 -1.548054                                         |
|                                                                         |  |  |  | H -0.157485 -0.244871 3.969522                                          |
|                                                                         |  |  |  | H 1.232597 0.821146 3.610097                                            |
|                                                                         |  |  |  | H -0.422946 1.303427 3.131520                                           |
|                                                                         |  |  |  | H 4.745042 2.089727 -1.078091                                           |
|                                                                         |  |  |  | H 4.966832 1.120173 -2.571111                                           |
|                                                                         |  |  |  | H 3.457571 2.040339 -2.314306                                           |
| TS EE1                                                                  |  |  |  |                                                                         |
| SCF Energy: -2943.48417437                                              |  |  |  |                                                                         |
| ZPE-corrected Energy: -2943.10942                                       |  |  |  |                                                                         |
| $\Delta U$ : -2943.08522                                                |  |  |  |                                                                         |
| $\Delta H$ : -2943.08428                                                |  |  |  |                                                                         |
| $\Delta G$ : -2943.16529                                                |  |  |  |                                                                         |
| $S^2$ before (1.0216) and after higher multiplicity projection (0.2027) |  |  |  |                                                                         |
| Num. Imaginary Frequencies: 1                                           |  |  |  |                                                                         |
| Imaginary Frequency: -116.6088                                          |  |  |  |                                                                         |
| Ni -1.291349 -1.091553 0.738725                                         |  |  |  |                                                                         |
| N -1.326392 0.869670 1.370534                                           |  |  |  |                                                                         |
| C -1.663681 1.756492 0.413536                                           |  |  |  |                                                                         |
| C -1.598493 3.131544 0.645666                                           |  |  |  |                                                                         |
| C -1.187123 3.588395 1.893494                                           |  |  |  |                                                                         |
| C -0.853198 2.662829 2.878661                                           |  |  |  |                                                                         |
| C -0.934258 1.309964 2.565468                                           |  |  |  |                                                                         |
| H -1.863172 3.845399 -0.139387                                          |  |  |  |                                                                         |
| H -1.128817 4.663331 2.093070                                           |  |  |  |                                                                         |
| H -0.529399 2.978699 3.874686                                           |  |  |  |                                                                         |
| H -0.674158 0.542760 3.305803                                           |  |  |  |                                                                         |
| C -2.094602 1.163379 -0.870899                                          |  |  |  |                                                                         |
| C -2.525079 1.910915 -1.968562                                          |  |  |  |                                                                         |
| C -2.926345 1.243087 -3.121735                                          |  |  |  |                                                                         |
| C -2.899872 -0.149184 -3.146528                                         |  |  |  |                                                                         |
| C -2.461667 -0.821791 -2.009971                                         |  |  |  |                                                                         |
| N -2.061311 -0.180673 -0.913126                                         |  |  |  |                                                                         |
| H -2.554389 3.003513 -1.929501                                          |  |  |  |                                                                         |
| H -3.265261 1.811054 -3.994370                                          |  |  |  |                                                                         |
| H -3.216941 -0.710215 -4.030743                                         |  |  |  |                                                                         |
| H -2.442634 -1.918432 -1.950357                                         |  |  |  |                                                                         |
| Cl -2.604832 -2.981458 0.702271                                         |  |  |  |                                                                         |
| C 0.708623 -1.392951 0.395472                                           |  |  |  |                                                                         |
| C 0.345235 -1.816514 1.681356                                           |  |  |  |                                                                         |
| C 1.403667 -0.109058 0.173363                                           |  |  |  |                                                                         |
| C 0.758719 -2.378401 -0.752857                                          |  |  |  |                                                                         |
| H 0.633175 -1.205109 2.551901                                           |  |  |  |                                                                         |
| H 0.148416 -2.880625 1.879434                                           |  |  |  |                                                                         |
| N 2.754956 -0.076737 -0.171748                                          |  |  |  |                                                                         |
| C 3.219699 1.010911 -0.892834                                           |  |  |  |                                                                         |
| C 4.694401 1.072360 -1.219194                                           |  |  |  |                                                                         |
| C 5.602949 0.229404 -0.344728                                           |  |  |  |                                                                         |
| C 4.993884 -1.150536 -0.195804                                          |  |  |  |                                                                         |
| C 3.651062 -1.038196 0.487173                                           |  |  |  |                                                                         |
| O 2.455811 1.873388 -1.301748                                           |  |  |  |                                                                         |
| H 4.973117 2.141426 -1.219593                                           |  |  |  |                                                                         |
| H 4.779970 0.742445 -2.276001                                           |  |  |  |                                                                         |
| H 6.617163 0.182996 -0.780727                                           |  |  |  |                                                                         |
| H 5.707728 0.692776 0.657484                                            |  |  |  |                                                                         |
| H 4.871011 -1.620235 -1.193555                                          |  |  |  |                                                                         |
| H 5.638718 -1.821404 0.400210                                           |  |  |  |                                                                         |
| H 3.145829 -2.017932 0.521353                                           |  |  |  |                                                                         |
| H 3.785841 -0.720485 1.543002                                           |  |  |  |                                                                         |
| H 0.880551 0.837202 -0.002642                                           |  |  |  |                                                                         |
| H 1.781765 -2.773859 -0.925469                                          |  |  |  |                                                                         |
| H 0.088668 -3.236572 -0.560742                                          |  |  |  |                                                                         |
| H 0.441944 -1.897288 -1.698861                                          |  |  |  |                                                                         |

## 6.4 Ni/Zn mechanism via a non-redox pathway

TS EF  
SCF Energy: -5376.18321846  
ZPE-corrected Energy: 0  
 $\Delta U$ : 0  
 $\Delta H$ : 0  
 $\Delta G$ : 0  
 $S^2$  before (0.9308) and after higher multiplicity projection (0.0674)  
Num. Imaginary Frequencies: 0

|    |           |           |           |
|----|-----------|-----------|-----------|
| Ni | -1.310305 | -0.899264 | 1.201668  |
| N  | -2.625727 | 0.330374  | 0.356912  |
| C  | -3.083218 | 1.427097  | 0.960024  |
| C  | -3.849502 | 2.371735  | 0.286950  |
| C  | -4.152498 | 2.139101  | -1.054148 |
| C  | -3.683593 | 0.985212  | -1.672613 |
| C  | -2.901271 | 0.095132  | -0.936094 |
| H  | -2.828246 | 1.531653  | 2.023484  |
| H  | -4.206793 | 3.265135  | 0.807186  |
| H  | -4.756732 | 2.856126  | -1.619621 |
| H  | -3.911482 | 0.793896  | -2.724875 |
| C  | -2.307433 | -1.140583 | -1.483633 |
| N  | -1.498678 | -1.811761 | -0.638941 |
| C  | -0.931782 | -2.947766 | -1.039598 |
| C  | -1.134503 | -3.481552 | -2.309106 |
| C  | -1.960350 | -2.792902 | -3.190025 |
| C  | -2.557025 | -1.605741 | -2.773139 |
| H  | -0.285881 | -3.454445 | -0.312673 |
| H  | -0.644520 | -4.417092 | -2.594463 |
| H  | -2.145075 | -3.175768 | -4.199079 |
| H  | -3.215804 | -1.054427 | -3.449934 |
| Cl | -2.410431 | -1.492918 | 3.096134  |
| C  | 0.594647  | -0.311435 | 1.919106  |
| C  | 1.021820  | -1.653565 | 1.895301  |
| C  | 0.428395  | 0.320828  | 0.676827  |
| H  | 0.915730  | -2.269713 | 2.799216  |
| H  | 1.119321  | -2.177977 | 0.934149  |
| N  | 0.289950  | 1.697753  | 0.439113  |
| H  | 0.656122  | -0.247891 | -0.233231 |
| C  | 0.836836  | 2.727795  | 1.329214  |
| C  | 1.710807  | 3.678362  | 0.531710  |
| C  | 0.930990  | 4.378431  | -0.582130 |
| C  | -0.322053 | 3.578932  | -0.957081 |
| C  | -0.147619 | 2.088891  | -0.810549 |
| O  | -0.403161 | 1.289234  | -1.698368 |
| H  | 1.450660  | 2.224516  | 2.088630  |
| H  | 0.021312  | 3.265102  | 1.857681  |
| H  | 2.187695  | 4.405547  | 1.212894  |
| H  | 2.510856  | 3.059062  | 0.084292  |
| H  | 0.633895  | 5.399672  | -0.281963 |
| H  | 1.576834  | 4.495598  | -1.472007 |
| H  | -0.655582 | 3.780436  | -1.988202 |
| H  | -1.158943 | 3.859274  | -0.284642 |
| C  | 0.440581  | 0.355545  | 3.258924  |
| C  | 3.263279  | -1.148551 | 1.801740  |
| O  | 3.328854  | -0.196267 | 0.998509  |
| H  | 3.218206  | -0.891637 | 2.883958  |
| C  | 3.720902  | -2.534528 | 1.492229  |
| H  | 3.423919  | -2.838582 | 0.474416  |
| H  | 4.829512  | -2.545247 | 1.547865  |
| H  | 3.339810  | -3.261086 | 2.229698  |
| Zn | 3.123392  | 0.041434  | -1.026325 |
| C  | 3.652225  | 1.770259  | -1.810235 |
| Cl | 2.084791  | -1.838558 | -1.699438 |
| H  | 0.048210  | -0.373447 | 3.988127  |
| H  | 1.414165  | 0.728487  | 3.638080  |
| H  | -0.265154 | 1.204331  | 3.234614  |
| H  | 4.287099  | 2.373550  | -1.131118 |
| H  | 4.226209  | 1.606843  | -2.743114 |
| H  | 2.755129  | 2.367064  | -2.072904 |

## 6.5 Ni/Zn mechanism via a redox pathway

A  
 SCF Energy: -4781.74641788  
 ZPE-corrected Energy: -4781.51348  
 $\Delta U$ : -4781.49234  
 $\Delta H$ : -4781.49140  
 $\Delta G$ : -4781.56605  
 $S^2$  before (0.4796) and after higher multiplicity projection (0.0032)  
 Num. Imaginary Frequencies: 0

|    |           |           |           |
|----|-----------|-----------|-----------|
| Ni | -0.175386 | -0.081391 | -0.675307 |
| Cl | -1.642155 | -1.755293 | -0.966166 |
| Cl | -1.718925 | 1.399447  | -1.347446 |
| N  | 1.326230  | -1.292141 | -0.217872 |
| C  | 1.293949  | -2.627284 | -0.215989 |
| C  | 2.409028  | -3.397037 | 0.098367  |
| C  | 3.596698  | -2.751826 | 0.422873  |
| C  | 3.629717  | -1.360790 | 0.426359  |
| C  | 2.473749  | -0.655547 | 0.101854  |
| C  | 2.387492  | 0.810898  | 0.081372  |
| H  | 0.329550  | -3.077687 | -0.474996 |
| H  | 2.335164  | -4.488062 | 0.085407  |
| H  | 4.495797  | -3.323457 | 0.673784  |
| H  | 4.552671  | -0.832290 | 0.678845  |
| C  | 3.439933  | 1.654842  | 0.427328  |
| C  | 3.244560  | 3.031701  | 0.386464  |
| C  | 2.002382  | 3.524877  | 0.003926  |
| C  | 0.997925  | 2.622149  | -0.328154 |
| N  | 1.186786  | 1.300306  | -0.295020 |
| H  | 4.405851  | 1.244187  | 0.732488  |
| H  | 4.059635  | 3.710722  | 0.655988  |
| H  | 1.801120  | 4.598947  | -0.039063 |
| H  | -0.001624 | 2.948841  | -0.635939 |
| Zn | -2.654113 | 0.020509  | 0.942608  |
| C  | -4.560136 | -0.082212 | 0.458366  |
| H  | -5.118655 | 0.831248  | 0.745429  |
| H  | -4.649017 | -0.200604 | -0.639599 |
| H  | -5.073002 | -0.943096 | 0.932381  |
| C  | -1.052746 | 0.266324  | 2.095698  |
| H  | -1.379709 | 0.182869  | 3.152768  |
| H  | -0.248432 | -0.484869 | 1.958489  |
| H  | -0.603203 | 1.272617  | 1.975222  |

B  
 SCF Energy: -4781.76118596  
 ZPE-corrected Energy: -4781.52636  
 $\Delta U$ : -4781.50599  
 $\Delta H$ : -4781.50504  
 $\Delta G$ : -4781.57686  
 Num. Imaginary Frequencies: 0

|    |           |           |           |
|----|-----------|-----------|-----------|
| N  | 1.233386  | -1.367251 | -0.381241 |
| C  | 1.381962  | -2.694348 | -0.295396 |
| C  | 2.507417  | -3.297673 | 0.252597  |
| C  | 3.528003  | -2.490128 | 0.740071  |
| C  | 3.385861  | -1.110659 | 0.649218  |
| C  | 2.231932  | -0.574806 | 0.081123  |
| H  | 0.564165  | -3.307854 | -0.681438 |
| H  | 2.569221  | -4.388807 | 0.292240  |
| H  | 4.429184  | -2.925336 | 1.183276  |
| H  | 4.177204  | -0.451845 | 1.015865  |
| C  | 2.012489  | 0.869578  | -0.078953 |
| N  | 0.874995  | 1.189834  | -0.720944 |
| C  | 0.579041  | 2.472948  | -0.922157 |
| C  | 1.405533  | 3.507084  | -0.494611 |
| C  | 2.577346  | 3.185288  | 0.181240  |
| C  | 2.888724  | 1.845760  | 0.391582  |
| Ni | -0.312751 | -0.399346 | -1.027825 |
| H  | -0.372831 | 2.670440  | -1.427916 |
| H  | 1.121956  | 4.546543  | -0.683836 |
| H  | 3.248292  | 3.969671  | 0.546202  |
| H  | 3.803117  | 1.572352  | 0.924733  |
| Cl | -2.081827 | 0.844559  | -1.516167 |
| Cl | -0.721844 | 1.103876  | 2.078744  |
| Zn | -2.191905 | -0.066905 | 0.862879  |
| C  | -3.768565 | -1.224825 | 1.067069  |
| C  | -1.302586 | -1.992738 | -1.396963 |
| H  | -4.345347 | -1.239381 | 0.122188  |
| H  | -3.472059 | -2.265785 | 1.300723  |
| H  | -4.435747 | -0.871309 | 1.876539  |
| H  | -0.719763 | -2.526090 | -2.178505 |
| H  | -2.317005 | -1.799830 | -1.787695 |
| H  | -1.395417 | -2.648277 | -0.507071 |

Ethane  
 SCF Energy: -79.6793951925  
 ZPE-corrected Energy: -79.605997  
 $\Delta U$ : -79.602497  
 $\Delta H$ : -79.601553  
 $\Delta G$ : -79.629117  
 Num. Imaginary Frequencies: 0

|   |           |           |           |
|---|-----------|-----------|-----------|
| C | -0.758776 | 0.000001  | 0.000000  |
| H | -1.165811 | 0.936540  | -0.424255 |
| H | -1.165830 | -0.835678 | -0.598939 |
| H | -1.165834 | -0.100851 | 1.023181  |
| C | 0.758776  | -0.000001 | 0.000000  |
| H | 1.165830  | 0.835677  | 0.598940  |
| H | 1.165811  | -0.936541 | 0.424253  |
| H | 1.165834  | 0.100853  | -1.023181 |

## 6.5 Ni/Zn mechanism via a redox pathway

H  
 SCF Energy: -4781.76624895  
 ZPE-corrected Energy: -4781.53047  
 $\Delta U$ : -4781.51066  
 $\Delta H$ : -4781.50971  
 $\Delta G$ : -4781.58041  
 Num. Imaginary Frequencies: 0

|    |           |           |           |
|----|-----------|-----------|-----------|
| N  | -1.112531 | 1.445434  | -0.458164 |
| C  | -1.038786 | 2.778580  | -0.419250 |
| C  | -1.987632 | 3.571916  | 0.215813  |
| C  | -3.057972 | 2.950060  | 0.848429  |
| C  | -3.146874 | 1.563193  | 0.805435  |
| C  | -2.162302 | 0.836283  | 0.137676  |
| H  | -0.178796 | 3.238093  | -0.916148 |
| H  | -1.876195 | 4.659922  | 0.212305  |
| H  | -3.822598 | 3.536043  | 1.368168  |
| H  | -3.984507 | 1.053960  | 1.288831  |
| C  | -2.198312 | -0.627886 | -0.007427 |
| N  | -1.183587 | -1.151698 | -0.724818 |
| C  | -1.171685 | -2.464641 | -0.958530 |
| C  | -2.149912 | -3.327790 | -0.477683 |
| C  | -3.181776 | -2.798502 | 0.289358  |
| C  | -3.210085 | -1.427853 | 0.521746  |
| Ni | 0.264668  | 0.174254  | -1.101527 |
| H  | -0.341760 | -2.851974 | -1.558287 |
| H  | -2.091687 | -4.396675 | -0.701996 |
| H  | -3.965886 | -3.443307 | 0.698818  |
| H  | -4.019736 | -0.990020 | 1.111186  |
| C  | 1.567236  | -1.194980 | -1.613211 |
| C  | 1.529344  | 1.557554  | -1.513950 |
| H  | 2.501411  | 1.246221  | -1.936473 |
| H  | 0.966764  | 2.104771  | -2.302818 |
| H  | 1.744185  | 2.268703  | -0.688545 |
| H  | 1.097215  | -1.320188 | -2.614534 |
| H  | 2.635749  | -0.971408 | -1.797001 |
| H  | 1.507065  | -2.174684 | -1.094043 |
| Zn | 1.952194  | -0.203864 | 0.469004  |
| Cl | 4.088611  | 0.335491  | 0.628776  |
| Cl | 0.686543  | -0.998690 | 2.136730  |

I  
 SCF Energy: -4702.05079363  
 ZPE-corrected Energy: -4701.88890  
 $\Delta U$ : -4701.87239  
 $\Delta H$ : -4701.87145  
 $\Delta G$ : -4701.93716  
 $S^2$  before (0.8056) and after higher multiplicity projection (0.0845)  
 Num. Imaginary Frequencies: 0

|    |           |           |           |
|----|-----------|-----------|-----------|
| N  | -0.704514 | 1.139096  | -0.053227 |
| C  | -0.004726 | 2.279244  | -0.006498 |
| C  | -0.598291 | 3.507706  | 0.263540  |
| C  | -1.969332 | 3.550717  | 0.498908  |
| C  | -2.699618 | 2.367227  | 0.445742  |
| C  | -2.041307 | 1.171410  | 0.160816  |
| H  | 1.075961  | 2.195607  | -0.193064 |
| H  | 0.014610  | 4.413689  | 0.289640  |
| H  | -2.472111 | 4.497882  | 0.719716  |
| H  | -3.778965 | 2.381384  | 0.621717  |
| C  | -2.726789 | -0.133912 | 0.058376  |
| N  | -1.923562 | -1.175015 | -0.246205 |
| C  | -2.449615 | -2.394992 | -0.372347 |
| C  | -3.806231 | -2.649209 | -0.202642 |
| C  | -4.643363 | -1.582480 | 0.116083  |
| C  | -4.097652 | -0.309112 | 0.250157  |
| Ni | -0.012092 | -0.628051 | -0.423427 |
| H  | -1.749532 | -3.201637 | -0.622360 |
| H  | -4.194401 | -3.665326 | -0.320186 |
| H  | -5.717675 | -1.737389 | 0.259146  |
| H  | -4.742193 | 0.538327  | 0.500457  |
| Zn | 2.348133  | -0.380814 | -0.004526 |
| Cl | 3.570270  | 1.442951  | -0.608413 |
| Cl | 3.493081  | -2.090060 | 0.935466  |

J  
 SCF Energy: -2443.55163088  
 ZPE-corrected Energy: -2443.21510  
 $\Delta U$ : -2443.19458  
 $\Delta H$ : -2443.19363  
 $\Delta G$ : -2443.26613  
 Num. Imaginary Frequencies: 0

|    |           |           |           |
|----|-----------|-----------|-----------|
| N  | -2.280089 | -0.793123 | -0.049244 |
| C  | -3.053449 | -1.870205 | 0.104514  |
| C  | -4.373130 | -1.790059 | 0.538675  |
| C  | -4.902266 | -0.534390 | 0.824811  |
| C  | -4.100098 | 0.591917  | 0.662867  |
| C  | -2.788276 | 0.430219  | 0.219698  |
| H  | -2.588165 | -2.835068 | -0.130009 |
| H  | -4.969672 | -2.700315 | 0.650317  |
| H  | -5.935482 | -0.428369 | 1.171129  |
| H  | -4.499086 | 1.587507  | 0.878171  |
| C  | -1.845206 | 1.545076  | -0.003556 |
| N  | -0.640808 | 1.165677  | -0.484119 |
| C  | 0.287266  | 2.093413  | -0.740185 |
| C  | 0.064844  | 3.449137  | -0.518188 |
| C  | -1.169950 | 3.848477  | -0.012741 |
| C  | -2.140569 | 2.884482  | 0.245788  |
| Ni | -0.396831 | -0.764920 | -0.591603 |
| H  | 1.237995  | 1.728834  | -1.152272 |
| H  | 0.851002  | 4.176242  | -0.742445 |
| H  | -1.380965 | 4.905795  | 0.177852  |
| H  | -3.117465 | 3.178426  | 0.640979  |
| C  | 1.395487  | -1.228697 | -0.987424 |
| C  | 0.552377  | -2.332974 | -0.640967 |
| C  | 0.590443  | -3.657683 | -0.471976 |
| H  | -0.304828 | -4.241403 | -0.197451 |
| H  | 1.518876  | -4.246396 | -0.591739 |
| N  | 2.444485  | -0.736751 | -0.117936 |
| H  | 1.695049  | -1.097429 | -2.039818 |
| C  | 2.250401  | -0.945691 | 1.312677  |
| C  | 3.473144  | -0.622333 | 2.140709  |
| H  | 1.389759  | -0.319787 | 1.644168  |
| H  | 1.942764  | -1.996545 | 1.461254  |
| C  | 4.005747  | 0.742432  | 1.752711  |
| H  | 3.200105  | -0.669954 | 3.210950  |
| H  | 4.258617  | -1.387931 | 1.973806  |
| C  | 4.409845  | 0.697620  | 0.292055  |
| H  | 3.211331  | 1.503551  | 1.903087  |
| H  | 4.861299  | 1.044187  | 2.384332  |
| C  | 3.357740  | 0.128813  | -0.639229 |
| H  | 4.677951  | 1.691523  | -0.108255 |
| H  | 5.315868  | 0.067207  | 0.172218  |
| O  | 3.374389  | 0.428717  | -1.832967 |



## 6.5 Ni/Zn mechanism via a redox pathway

K  
 SCF Energy: -2597.21519638  
 ZPE-corrected Energy: -2596.81566  
 $\Delta U$ : -2596.79246  
 $\Delta H$ : -2596.79152  
 $\Delta G$ : -2596.86936  
 Num. Imaginary Frequencies: 0

|    |           |           |           |
|----|-----------|-----------|-----------|
| C  | -3.150866 | 2.874922  | 0.267115  |
| C  | -2.665483 | 1.574834  | 0.151363  |
| N  | -1.366759 | 1.319773  | -0.151187 |
| C  | -0.549329 | 2.354215  | -0.391800 |
| C  | -0.970187 | 3.677508  | -0.304197 |
| C  | -2.290169 | 3.944339  | 0.042557  |
| C  | -3.506854 | 0.376359  | 0.291010  |
| N  | -2.862212 | -0.767681 | -0.003499 |
| C  | -3.502696 | -1.934705 | 0.051840  |
| C  | -4.845037 | -2.017441 | 0.408752  |
| C  | -5.524716 | -0.842227 | 0.721819  |
| C  | -4.850522 | 0.374590  | 0.662792  |
| Ni | -0.935867 | -0.555096 | -0.317182 |
| O  | -0.756948 | -2.327928 | -0.702685 |
| C  | 0.542449  | -2.792547 | -0.885754 |
| C  | 1.061955  | -3.486665 | 0.365847  |
| C  | 1.408841  | -1.593651 | -1.283774 |
| C  | 0.942207  | -0.479516 | -0.390330 |
| C  | 1.750856  | 0.280244  | 0.360281  |
| N  | 3.186416  | 0.210565  | 0.330413  |
| C  | 3.825719  | -0.846313 | 1.112856  |
| C  | 5.286906  | -1.019310 | 0.761828  |
| C  | 5.987026  | 0.325294  | 0.817790  |
| C  | 5.356873  | 1.251718  | -0.206275 |
| C  | 3.842251  | 1.279833  | -0.205710 |
| H  | 1.166358  | -1.335591 | -2.336104 |
| H  | 2.501419  | -1.800214 | -1.242665 |
| H  | 0.550527  | -3.544936 | -1.713166 |
| H  | 1.103777  | -2.771025 | 1.211417  |
| H  | 0.378135  | -4.307273 | 0.655037  |
| H  | 2.073002  | -3.915956 | 0.218053  |
| H  | 1.360323  | 1.060311  | 1.035412  |
| H  | 3.265819  | -1.783120 | 0.939988  |
| H  | 3.721331  | -0.613129 | 2.195757  |
| H  | 5.376343  | -1.445037 | -0.259708 |
| H  | 5.742174  | -1.747912 | 1.457377  |
| H  | 7.072029  | 0.227066  | 0.631070  |
| H  | 5.877106  | 0.752005  | 1.836052  |
| H  | 5.695752  | 2.297985  | -0.102025 |
| H  | 5.653717  | 0.939350  | -1.229249 |
| O  | 3.241447  | 2.218157  | -0.718862 |
| H  | -2.885332 | -2.804995 | -0.203942 |
| H  | -5.345713 | -2.989644 | 0.442174  |
| H  | -6.579984 | -0.869395 | 1.012643  |
| H  | -5.368659 | 1.306303  | 0.907700  |
| H  | 0.486313  | 2.109641  | -0.654390 |
| H  | -0.258867 | 4.483101  | -0.508481 |
| H  | -2.653824 | 4.973505  | 0.125796  |
| H  | -4.200930 | 3.052313  | 0.516578  |

L  
 SCF Energy: -4456.01228286  
 ZPE-corrected Energy: -4455.54265  
 $\Delta U$ : -4455.51205  
 $\Delta H$ : -4455.51111  
 $\Delta G$ : -4455.60531  
 Num. Imaginary Frequencies: 0

|    |           |           |           |
|----|-----------|-----------|-----------|
| C  | 2.343108  | 3.772366  | 0.494645  |
| C  | 2.004172  | 2.483263  | 0.092740  |
| N  | 0.828611  | 1.910870  | 0.454132  |
| C  | 0.006143  | 2.585934  | 1.265480  |
| C  | 0.285781  | 3.872148  | 1.715743  |
| C  | 1.468600  | 4.481411  | 1.312078  |
| C  | 2.890721  | 1.614581  | -0.696204 |
| N  | 2.435644  | 0.353848  | -0.824632 |
| C  | 3.149862  | -0.549629 | -1.496417 |
| C  | 4.375351  | -0.235133 | -2.075985 |
| C  | 4.855034  | 1.066550  | -1.954917 |
| C  | 4.104728  | 2.008361  | -1.255997 |
| Ni | 0.607829  | 0.095040  | -0.134721 |
| O  | 0.668526  | -1.719604 | -0.497097 |
| C  | -0.586620 | -2.349998 | -0.590485 |
| C  | -1.094822 | -2.347450 | -2.020678 |
| C  | -1.529250 | -1.609563 | 0.356400  |
| C  | -1.248466 | -0.150117 | 0.120371  |
| C  | -2.210679 | 0.737674  | -0.171351 |
| N  | -3.612563 | 0.428937  | -0.143834 |
| C  | -4.317114 | 0.579976  | -1.303590 |
| C  | -5.808505 | 0.316963  | -1.264356 |
| C  | -6.446372 | 0.388387  | 0.110837  |
| C  | -5.592134 | -0.395529 | 1.088854  |
| C  | -4.216844 | 0.227565  | 1.173618  |
| H  | -1.266323 | -1.885304 | 1.400782  |
| H  | -2.590999 | -1.896474 | 0.191291  |
| H  | -0.471325 | -3.410124 | -0.264651 |
| H  | -1.260388 | -1.310838 | -2.375011 |
| H  | -0.358305 | -2.827162 | -2.692074 |
| H  | -2.051558 | -2.898143 | -2.107671 |
| H  | -1.988114 | 1.771990  | -0.480716 |
| O  | -3.766547 | 0.871010  | -2.358914 |
| H  | -5.946420 | -0.698254 | -1.691401 |
| H  | -6.272924 | 1.010606  | -1.988052 |
| H  | -7.481691 | 0.003115  | 0.075126  |
| H  | -6.511328 | 1.443656  | 0.447284  |
| H  | -6.040378 | -0.418644 | 2.098978  |
| H  | -5.503843 | -1.448599 | 0.748033  |
| H  | -4.275267 | 1.206012  | 1.699748  |
| H  | -3.535866 | -0.407046 | 1.769172  |
| H  | 2.698961  | -1.548417 | -1.556963 |
| H  | 4.938495  | -1.001568 | -2.616414 |
| H  | 5.811272  | 1.352508  | -2.404914 |
| H  | 4.462376  | 3.037150  | -1.156716 |
| H  | -0.914084 | 2.069018  | 1.555022  |
| H  | -0.422993 | 4.379944  | 2.376106  |
| H  | 1.720031  | 5.494620  | 1.641354  |
| H  | 3.294853  | 4.214561  | 0.186956  |
| Zn | 1.780098  | -2.422250 | 1.219739  |
| C  | 1.801318  | -0.946773 | 2.560380  |
| C  | 2.193271  | -4.281390 | 0.654447  |
| H  | 2.178843  | -1.280305 | 3.548881  |
| H  | 2.446804  | -0.104753 | 2.233612  |
| H  | 0.784638  | -0.529919 | 2.717136  |
| H  | 2.325921  | -4.325896 | -0.446340 |
| H  | 3.107148  | -4.701117 | 1.120608  |
| H  | 1.358911  | -4.968639 | 0.905591  |

## 6.5 Ni/Zn mechanism via a redox pathway

|                                   |           |           |                                   |    |           |           |           |
|-----------------------------------|-----------|-----------|-----------------------------------|----|-----------|-----------|-----------|
| M                                 |           |           | N                                 |    |           |           |           |
| SCF Energy: -4456.00626494        |           |           | SCF Energy: -4456.03486123        |    |           |           |           |
| ZPE-corrected Energy: -4455.53528 |           |           | ZPE-corrected Energy: -4455.56179 |    |           |           |           |
| $\Delta U$ : -4455.50535          |           |           | $\Delta U$ : -4455.53213          |    |           |           |           |
| $\Delta H$ : -4455.50441          |           |           | $\Delta H$ : -4455.53118          |    |           |           |           |
| $\Delta G$ : -4455.59539          |           |           | $\Delta G$ : -4455.62286          |    |           |           |           |
| Num. Imaginary Frequencies: 0     |           |           | Num. Imaginary Frequencies: 0     |    |           |           |           |
| C                                 | 3.819145  | 1.457874  | 0.133558                          | C  | -1.473784 | -2.064598 | -1.111986 |
| N                                 | 3.381043  | 0.353175  | 0.804581                          | N  | -2.208516 | -1.367281 | -0.059154 |
| C                                 | 4.239997  | -0.508558 | 1.617305                          | C  | -3.542622 | -1.525861 | 0.181470  |
| C                                 | 5.694539  | -0.464248 | 1.204681                          | C  | -4.343371 | -2.402993 | -0.760962 |
| C                                 | 6.148344  | 0.977311  | 1.086194                          | C  | -3.528682 | -3.341067 | -1.630695 |
| C                                 | 5.317142  | 1.657911  | 0.015497                          | C  | -2.371412 | -2.561232 | -2.222903 |
| C                                 | 1.974747  | 0.119879  | 0.998390                          | C  | -1.483103 | -0.526694 | 0.874930  |
| C                                 | 1.103192  | -0.260891 | 0.050660                          | C  | -1.446363 | 0.911767  | 0.690790  |
| C                                 | 1.529270  | -0.515797 | -1.367251                         | C  | -2.075433 | 1.496939  | -0.562054 |
| C                                 | 1.555679  | -1.997902 | -1.791086                         | C  | -1.665949 | 2.948279  | -0.914680 |
| C                                 | 2.581770  | -2.781673 | -0.979372                         | C  | -2.596167 | 3.988844  | -0.292995 |
| O                                 | 0.326017  | -2.617652 | -1.773863                         | O  | -0.336357 | 3.231618  | -0.636395 |
| Ni                                | -0.693697 | -0.204689 | 0.616241                          | Ni | 0.271865  | -0.103661 | 0.358114  |
| N                                 | -2.579549 | 0.056046  | 1.241967                          | N  | 1.361918  | -1.686446 | 0.700632  |
| C                                 | -3.227540 | 1.036522  | 0.579183                          | C  | 2.613165  | -1.616133 | 0.197623  |
| C                                 | -4.591424 | 1.264409  | 0.761204                          | C  | 3.607056  | -2.516431 | 0.579624  |
| C                                 | -5.293916 | 0.478639  | 1.668418                          | C  | 3.296835  | -3.513929 | 1.498651  |
| C                                 | -4.610747 | -0.504625 | 2.376911                          | C  | 2.001885  | -3.586674 | 2.005978  |
| C                                 | -3.254574 | -0.681949 | 2.124435                          | C  | 1.067357  | -2.648658 | 1.581250  |
| C                                 | -2.371395 | 1.863800  | -0.288909                         | C  | 2.808134  | -0.540047 | -0.789194 |
| C                                 | -2.844955 | 2.934472  | -1.045400                         | C  | 3.884988  | -0.500023 | -1.673131 |
| C                                 | -1.935566 | 3.718098  | -1.749481                         | C  | 3.930228  | 0.498526  | -2.641198 |
| C                                 | -0.580222 | 3.422077  | -1.656317                         | C  | 2.893568  | 1.424125  | -2.698880 |
| C                                 | -0.181808 | 2.323731  | -0.897997                         | C  | 1.862069  | 1.336994  | -1.768621 |
| N                                 | -1.058341 | 1.547997  | -0.250690                         | N  | 1.822647  | 0.386669  | -0.823224 |
| H                                 | 0.836972  | -0.000962 | -2.070040                         | H  | -1.810075 | 0.844496  | -1.419132 |
| H                                 | 2.536481  | -0.093217 | -1.562677                         | H  | -3.186496 | 1.449055  | -0.477553 |
| H                                 | 1.944664  | -1.974620 | -2.844942                         | H  | -1.824883 | 3.039354  | -2.019472 |
| H                                 | 2.319065  | -2.776764 | 0.096963                          | H  | -2.563980 | 3.970547  | 0.812610  |
| H                                 | 2.606489  | -3.834482 | -1.319664                         | H  | -2.286010 | 5.000515  | -0.617457 |
| H                                 | 3.601171  | -2.358793 | -1.088634                         | H  | -3.647693 | 3.835287  | -0.605958 |
| H                                 | 1.671459  | 0.241418  | 2.055290                          | H  | -1.639958 | -0.871423 | 1.914511  |
| H                                 | 3.843406  | -1.538100 | 1.539861                          | O  | -4.105645 | -0.954668 | 1.109252  |
| H                                 | 4.139501  | -0.211493 | 2.685551                          | H  | -4.923473 | -1.705060 | -1.399879 |
| H                                 | 5.821446  | -0.974850 | 0.227366                          | H  | -5.091225 | -2.931809 | -0.142765 |
| H                                 | 6.295293  | -1.026538 | 1.942896                          | H  | -4.163809 | -3.790052 | -2.416149 |
| H                                 | 7.224111  | 1.046953  | 0.841763                          | H  | -3.131924 | -4.180632 | -1.023380 |
| H                                 | 6.008575  | 1.489388  | 2.060491                          | H  | -1.773202 | -3.175765 | -2.920351 |
| H                                 | 5.485629  | 2.748438  | -0.029669                         | H  | -2.761883 | -1.698126 | -2.802289 |
| H                                 | 5.599701  | 1.265899  | -0.984136                         | H  | -0.912334 | -2.918339 | -0.672692 |
| O                                 | 3.060024  | 2.250070  | -0.414774                         | H  | -0.707575 | -1.371977 | -1.513548 |
| H                                 | -2.685780 | -1.456932 | 2.649848                          | H  | 0.036429  | -2.666253 | 1.954492  |
| H                                 | -5.115777 | -1.134498 | 3.114904                          | H  | 1.712914  | -4.358069 | 2.725787  |
| H                                 | -6.364653 | 0.643222  | 1.826366                          | H  | 4.063447  | -4.227781 | 1.816858  |
| H                                 | -5.104448 | 2.056684  | 0.209427                          | H  | 4.620063  | -2.432400 | 0.175200  |
| H                                 | 0.882973  | 2.070516  | -0.782620                         | H  | 1.041957  | 2.074704  | -1.741438 |
| H                                 | 0.172779  | 4.029472  | -2.167268                         | H  | 2.879973  | 2.219240  | -3.450370 |
| H                                 | -2.286942 | 4.562194  | -2.351866                         | H  | 4.763677  | 0.542055  | -3.349916 |
| H                                 | -3.913342 | 3.164428  | -1.082824                         | H  | 4.669404  | -1.261231 | -1.626404 |
| Zn                                | -1.256454 | -1.908867 | -1.141659                         | Zn | 0.520023  | 2.325748  | 0.777801  |
| C                                 | -3.211120 | -1.863214 | -1.324447                         | C  | 1.875631  | 2.357045  | 2.205479  |
| H                                 | -3.557154 | -0.845446 | -1.592875                         | H  | 2.670352  | 1.618066  | 1.979528  |
| H                                 | -3.558570 | -2.559374 | -2.112372                         | H  | 2.353707  | 3.347070  | 2.336186  |
| H                                 | -3.699343 | -2.147340 | -0.371301                         | H  | 1.415897  | 2.070473  | 3.172119  |
| C                                 | -0.463022 | -1.914105 | 1.469661                          | C  | -1.763636 | 1.654619  | 1.986936  |
| H                                 | 0.365086  | -2.556097 | 1.120234                          | H  | -1.424849 | 2.709728  | 2.040522  |
| H                                 | -0.243257 | -1.624099 | 2.523419                          | H  | -2.866305 | 1.680123  | 2.126516  |
| H                                 | -1.384024 | -2.538161 | 1.484583                          | H  | -1.323773 | 1.135309  | 2.859992  |

## 6.5 Ni/Zn mechanism via a redox pathway

TS AB.3  
 SCF Energy: -4781.75483894  
 ZPE-corrected Energy: 0  
 $\Delta U$ : 0  
 $\Delta H$ : 0  
 $\Delta G$ : 0  
 $S^2$  before (2.0071) and after higher multiplicity projection (2.0000)  
 Num. Imaginary Frequencies: 0

|    |           |           |           |
|----|-----------|-----------|-----------|
| N  | 1.546755  | -1.271820 | 0.039535  |
| C  | 1.661127  | -2.596809 | 0.107258  |
| C  | 2.896225  | -3.238392 | 0.103680  |
| C  | 4.044335  | -2.457240 | 0.019850  |
| C  | 3.923509  | -1.071960 | -0.050570 |
| C  | 2.650233  | -0.503479 | -0.034768 |
| H  | 0.717509  | -3.154869 | 0.162712  |
| H  | 2.949774  | -4.329204 | 0.163741  |
| H  | 5.036113  | -2.920910 | 0.010092  |
| H  | 4.818370  | -0.447338 | -0.116304 |
| C  | 2.412061  | 0.958350  | -0.082317 |
| N  | 1.122271  | 1.333777  | -0.066315 |
| C  | 0.797992  | 2.624490  | -0.058807 |
| C  | 1.758068  | 3.630413  | -0.091120 |
| C  | 3.098991  | 3.258737  | -0.127795 |
| C  | 3.434302  | 1.907921  | -0.118013 |
| Ni | -0.295312 | -0.187151 | -0.081873 |
| H  | -0.274299 | 2.851400  | -0.012459 |
| H  | 1.455146  | 4.681375  | -0.086461 |
| H  | 3.887479  | 4.017791  | -0.156290 |
| H  | 4.484839  | 1.605451  | -0.132120 |
| C  | -1.354769 | 0.643366  | -1.726403 |
| Zn | -2.803882 | 0.079738  | -0.167937 |
| C  | -4.758520 | 0.287695  | -0.234996 |
| Cl | -1.689098 | -2.148399 | -0.093341 |
| H  | -1.439621 | 1.745447  | -1.794086 |
| H  | -0.412542 | 0.359760  | -2.243687 |
| H  | -2.142353 | 0.200585  | -2.374440 |
| Cl | -1.445882 | 0.745881  | 1.776169  |
| H  | -5.045827 | 1.355512  | -0.279584 |
| H  | -5.181949 | -0.212883 | -1.127278 |
| H  | -5.237314 | -0.153488 | 0.660124  |

TS AB  
 SCF Energy: -4781.73966616  
 ZPE-corrected Energy: 0  
 $\Delta U$ : 0  
 $\Delta H$ : 0  
 $\Delta G$ : 0  
 $S^2$  before (0.9124) and after higher multiplicity projection (0.0205)  
 Num. Imaginary Frequencies: 0

|    |           |           |           |
|----|-----------|-----------|-----------|
| N  | 1.516331  | -1.264076 | 0.086320  |
| C  | 1.617376  | -2.591144 | 0.080067  |
| C  | 2.844178  | -3.239367 | -0.031753 |
| C  | 3.994005  | -2.461511 | -0.132884 |
| C  | 3.883322  | -1.073368 | -0.131959 |
| C  | 2.616163  | -0.500001 | -0.025534 |
| H  | 0.669292  | -3.139057 | 0.169221  |
| H  | 2.892311  | -4.332192 | -0.035702 |
| H  | 4.979544  | -2.931103 | -0.216355 |
| H  | 4.779288  | -0.452705 | -0.218925 |
| C  | 2.367658  | 0.958143  | -0.043491 |
| N  | 1.074495  | 1.329195  | 0.038504  |
| C  | 0.748785  | 2.621510  | -0.003552 |
| C  | 1.703927  | 3.625395  | -0.120266 |
| C  | 3.044198  | 3.258845  | -0.192369 |
| C  | 3.381739  | 1.909466  | -0.155791 |
| Ni | -0.279408 | -0.174562 | 0.193917  |
| H  | -0.320531 | 2.852002  | 0.079160  |
| H  | 1.394399  | 4.673995  | -0.150362 |
| H  | 3.828093  | 4.018182  | -0.278506 |
| H  | 4.430249  | 1.605284  | -0.213200 |
| C  | -0.923426 | 0.088230  | -1.764424 |
| Zn | -2.671908 | -0.033056 | -0.402659 |
| C  | -4.583998 | 0.049004  | -0.845046 |
| Cl | -1.641476 | -2.024172 | 0.613691  |
| H  | -1.007401 | 1.153147  | -2.060913 |
| H  | 0.071405  | -0.256734 | -2.107768 |
| H  | -1.655716 | -0.509940 | -2.348825 |
| Cl | -1.856387 | 1.240287  | 1.509305  |
| H  | -4.892438 | 1.078023  | -1.107063 |
| H  | -4.853990 | -0.635764 | -1.669836 |
| H  | -5.169527 | -0.244709 | 0.046480  |

## 6.5 Ni/Zn mechanism via a redox pathway

TS BH  
 SCF Energy: -4781.74660541  
 ZPE-corrected Energy: -4781.51241  
 $\Delta U$ : -4781.49289  
 $\Delta H$ : -4781.49194  
 $\Delta G$ : -4781.56093  
 $S^2$  before (0.0680) and after higher multiplicity projection (0.0001)  
 Num. Imaginary Frequencies: 1  
 Imaginary Frequency: -128.7071

|    |           |           |           |
|----|-----------|-----------|-----------|
| N  | 1.744562  | -1.241436 | 0.076384  |
| C  | 2.065960  | -2.537784 | 0.120369  |
| C  | 3.376288  | -2.995982 | 0.043673  |
| C  | 4.402448  | -2.066775 | -0.088035 |
| C  | 4.077718  | -0.715821 | -0.132880 |
| C  | 2.740445  | -0.331199 | -0.045703 |
| H  | 1.237358  | -3.245487 | 0.222038  |
| H  | 3.578046  | -4.070151 | 0.087154  |
| H  | 5.447165  | -2.386484 | -0.154352 |
| H  | 4.865759  | 0.035295  | -0.234810 |
| C  | 2.301015  | 1.072705  | -0.065988 |
| N  | 0.967561  | 1.241058  | 0.026860  |
| C  | 0.457177  | 2.474142  | 0.045049  |
| C  | 1.253300  | 3.610016  | -0.041714 |
| C  | 2.632223  | 3.448712  | -0.147021 |
| C  | 3.165272  | 2.164533  | -0.155606 |
| Ni | -0.074449 | -0.438378 | 0.089192  |
| H  | -0.630637 | 2.546213  | 0.154006  |
| H  | 0.793127  | 4.602084  | -0.023945 |
| H  | 3.293309  | 4.318458  | -0.216971 |
| H  | 4.246256  | 2.018570  | -0.228116 |
| C  | -1.191583 | 0.170788  | -1.924849 |
| Zn | -2.463695 | 0.085835  | -0.345910 |
| Cl | -4.589476 | -0.507148 | -0.213667 |
| C  | -0.958110 | -2.151105 | 0.167276  |
| H  | -0.668249 | -2.752188 | -0.719013 |
| H  | -2.068802 | -2.161103 | 0.214825  |
| H  | -0.608034 | -2.655560 | 1.091481  |
| H  | -1.155240 | 1.225868  | -2.257913 |
| H  | -0.163529 | -0.237850 | -2.020650 |
| H  | -1.801912 | -0.413878 | -2.641671 |
| Cl | -1.603875 | 0.508621  | 1.815885  |

TS HI  
 SCF Energy: -4781.71227047  
 ZPE-corrected Energy: -4781.47740  
 $\Delta U$ : -4781.45771  
 $\Delta H$ : -4781.45677  
 $\Delta G$ : -4781.52756  
 Num. Imaginary Frequencies: 1  
 Imaginary Frequency: -451.8164

|    |           |           |           |
|----|-----------|-----------|-----------|
| N  | -2.075890 | -1.037818 | -0.159344 |
| C  | -2.661824 | -2.222024 | -0.308893 |
| C  | -4.043259 | -2.389398 | -0.293672 |
| C  | -4.837204 | -1.261882 | -0.109113 |
| C  | -4.227075 | -0.020983 | 0.044851  |
| C  | -2.832977 | 0.058658  | 0.012234  |
| H  | -1.997435 | -3.086495 | -0.448077 |
| H  | -4.480242 | -3.384077 | -0.421320 |
| H  | -5.928776 | -1.342813 | -0.084989 |
| H  | -4.842341 | 0.870985  | 0.188380  |
| C  | -2.084319 | 1.325217  | 0.153658  |
| N  | -0.733204 | 1.238480  | 0.077162  |
| C  | -0.018199 | 2.368116  | 0.180117  |
| C  | -0.595311 | 3.619027  | 0.373246  |
| C  | -1.977920 | 3.710674  | 0.463130  |
| C  | -2.729049 | 2.546763  | 0.347165  |
| Ni | -0.023495 | -0.624975 | -0.058865 |
| H  | 1.069717  | 2.280966  | 0.077326  |
| H  | 0.045467  | 4.502496  | 0.447568  |
| H  | -2.473050 | 4.674884  | 0.616740  |
| H  | -3.819031 | 2.595870  | 0.408029  |
| C  | 0.664358  | -2.118312 | -1.067233 |
| C  | 0.470862  | -2.199391 | 0.925627  |
| H  | 1.477473  | -2.611508 | 1.089572  |
| H  | 0.277548  | -1.463381 | 1.754629  |
| H  | -0.292490 | -2.996212 | 0.976767  |
| H  | 0.471503  | -1.377539 | -1.892063 |
| H  | 1.716414  | -2.439894 | -1.129941 |
| H  | 0.010849  | -2.991892 | -1.245561 |
| Zn | 2.267378  | -0.080339 | 0.005207  |
| Cl | 3.873701  | -1.437580 | 0.864039  |
| Cl | 3.202540  | 1.718442  | -1.016773 |

## 6.5 Ni/Zn mechanism via a redox pathway

TS JK  
 SCF Energy: -2597.12916249  
 ZPE-corrected Energy: -2596.73582  
 $\Delta U$ : -2596.71131  
 $\Delta H$ : -2596.71037  
 $\Delta G$ : -2596.79235  
 $S^2$  before (0.0853) and after higher multiplicity projection (0.0006)  
 Num. Imaginary Frequencies: 1  
 Imaginary Frequency: -432.3070

|    |           |           |           |
|----|-----------|-----------|-----------|
| N  | -1.501664 | -0.350928 | -1.264399 |
| C  | -1.665566 | -0.246820 | -2.584735 |
| C  | -2.635204 | -0.967607 | -3.274544 |
| C  | -3.459469 | -1.828249 | -2.554204 |
| C  | -3.290735 | -1.936667 | -1.176569 |
| C  | -2.298783 | -1.179233 | -0.555793 |
| H  | -0.987651 | 0.442955  | -3.102191 |
| H  | -2.735913 | -0.853527 | -4.357809 |
| H  | -4.232407 | -2.415372 | -3.060608 |
| H  | -3.928058 | -2.608408 | -0.594157 |
| C  | -2.019817 | -1.200993 | 0.894200  |
| N  | -0.978398 | -0.431065 | 1.268083  |
| C  | -0.633324 | -0.352175 | 2.552970  |
| C  | -1.313390 | -1.053992 | 3.544252  |
| C  | -2.386952 | -1.858597 | 3.171131  |
| C  | -2.748621 | -1.935144 | 1.828574  |
| Ni | -0.165901 | 0.616577  | -0.184761 |
| H  | 0.230966  | 0.284377  | 2.779056  |
| H  | -1.000933 | -0.969510 | 4.589221  |
| H  | -2.946008 | -2.426168 | 3.922275  |
| C  | -3.593871 | -2.556809 | 1.519141  |
| C  | 1.752231  | 1.098046  | 0.169654  |
| C  | 1.025654  | 1.821890  | -0.774750 |
| C  | 0.799235  | 3.198137  | -0.944301 |
| H  | 0.066926  | 3.484523  | -1.717282 |
| H  | 1.667944  | 3.882376  | -0.893529 |
| N  | 2.528851  | -0.061906 | -0.142260 |
| H  | 2.090757  | 1.580415  | 1.104776  |
| C  | 2.633169  | -0.445843 | -1.548088 |
| C  | 3.739385  | -1.444501 | -1.803703 |
| H  | 1.657111  | -0.862255 | -1.881470 |
| H  | 2.789409  | 0.480327  | -2.133041 |
| C  | 3.625144  | -2.596273 | -0.824202 |
| H  | 3.672065  | -1.788956 | -2.851822 |
| H  | 4.727341  | -0.953625 | -1.687418 |
| C  | 3.790085  | -2.054632 | 0.583443  |
| H  | 2.630204  | -3.075042 | -0.933435 |
| H  | 4.378872  | -3.378769 | -1.026793 |
| C  | 2.946001  | -0.839646 | 0.903337  |
| H  | 3.565272  | -2.806987 | 1.360091  |
| H  | 4.845835  | -1.754143 | 0.749782  |
| O  | 2.695973  | -0.544996 | 2.066588  |
| O  | -1.276798 | 2.702949  | 0.525880  |
| C  | -0.301877 | 3.519328  | 0.543963  |
| C  | -0.610231 | 4.999954  | 0.386027  |
| H  | 0.502621  | 3.366639  | 1.324273  |
| H  | 0.297809  | 5.622283  | 0.278022  |
| H  | -1.269881 | 5.158140  | -0.488475 |
| H  | -1.159713 | 5.345144  | 1.285001  |

TS LM  
 SCF Energy: -4455.99042197  
 ZPE-corrected Energy: -4455.52228  
 $\Delta U$ : -4455.49228  
 $\Delta H$ : -4455.49134  
 $\Delta G$ : -4455.58338  
 Num. Imaginary Frequencies: 1  
 Imaginary Frequency: -101.7623

|    |           |           |           |
|----|-----------|-----------|-----------|
| C  | -3.292394 | 3.110636  | -0.354220 |
| C  | -2.756840 | 1.823693  | -0.308551 |
| N  | -1.420389 | 1.608335  | -0.221575 |
| C  | -0.599839 | 2.667291  | -0.155128 |
| C  | -1.067533 | 3.976364  | -0.189828 |
| C  | -2.436847 | 4.204530  | -0.297989 |
| C  | -3.572376 | 0.601957  | -0.328150 |
| N  | -2.855384 | -0.540332 | -0.319771 |
| C  | -3.481409 | -1.718151 | -0.278308 |
| C  | -4.867237 | -1.820956 | -0.266262 |
| C  | -5.620965 | -0.649063 | -0.299056 |
| C  | -4.968111 | 0.578128  | -0.326659 |
| Ni | -0.918678 | -0.295422 | -0.241402 |
| O  | -0.604237 | -1.635010 | 1.399832  |
| C  | 0.124192  | -0.879302 | 2.316757  |
| C  | -0.825434 | -0.048121 | 3.165289  |
| C  | 1.161081  | 0.022321  | 1.592933  |
| C  | 0.904903  | 0.029163  | 0.110015  |
| C  | 1.860802  | 0.228143  | -0.810536 |
| N  | 3.230449  | 0.491844  | -0.519844 |
| C  | 3.590642  | 1.636235  | 0.141350  |
| C  | 5.062250  | 1.825476  | 0.444164  |
| C  | 6.012314  | 1.096842  | -0.488485 |
| C  | 5.563754  | -0.346123 | -0.614885 |
| C  | 4.171870  | -0.399035 | -1.203733 |
| H  | 2.202853  | -0.315759 | 1.789701  |
| H  | 1.120060  | 1.065512  | 1.975166  |
| H  | 0.686489  | -1.560314 | 3.006376  |
| H  | -1.374650 | 0.664530  | 2.514684  |
| H  | -1.569572 | -0.697322 | 3.664506  |
| H  | -0.291922 | 0.534155  | 3.941932  |
| H  | 1.648321  | 0.143728  | -1.891002 |
| O  | 2.772061  | 2.463662  | 0.522021  |
| H  | 5.208844  | 1.465116  | 1.484072  |
| H  | 5.241678  | 2.914572  | 0.472253  |
| H  | 7.048941  | 1.167565  | -0.111829 |
| H  | 6.003732  | 1.574752  | -1.489647 |
| H  | 6.247037  | -0.934271 | -1.254293 |
| H  | 5.563652  | -0.825259 | 0.385943  |
| H  | 4.203413  | -0.129051 | -2.282698 |
| H  | 3.760090  | -1.423936 | -1.144927 |
| H  | -2.838480 | -2.605203 | -0.252263 |
| H  | -5.343116 | -2.805261 | -0.232164 |
| H  | -6.715083 | -0.688797 | -0.295863 |
| H  | -5.543367 | 1.508175  | -0.336771 |
| H  | 0.475562  | 2.454860  | -0.067615 |
| H  | -0.354776 | 4.804558  | -0.132135 |
| H  | -2.837736 | 5.222570  | -0.333915 |
| H  | -4.373261 | 3.258251  | -0.433407 |
| Zn | 0.470938  | -2.369467 | -0.156416 |
| C  | -0.586588 | -1.751877 | -1.890043 |
| C  | 2.020875  | -3.563092 | 0.162389  |
| H  | 0.306905  | -1.974881 | -2.511276 |
| H  | -1.332816 | -2.553850 | -2.063093 |
| H  | -1.006591 | -0.829750 | -2.347304 |
| H  | 1.772416  | -4.418952 | 0.821223  |
| H  | 2.457405  | -3.972698 | -0.769986 |
| H  | 2.820840  | -2.985730 | 0.673186  |

## 6.5 Ni/Zn mechanism via a redox pathway

TS MN  
SCF Energy: -4455.96310702  
ZPE-corrected Energy: -4455.49418  
 $\Delta U$ : -4455.46407  
 $\Delta H$ : -4455.46312  
 $\Delta G$ : -4455.55672  
Num. Imaginary Frequencies: 1  
Imaginary Frequency: -419.7991

|    |           |           |           |
|----|-----------|-----------|-----------|
| C  | -3.308197 | -1.433287 | -0.699605 |
| N  | -3.267544 | -0.675449 | 0.553163  |
| C  | -4.306016 | -0.639784 | 1.447347  |
| C  | -5.640526 | -1.215799 | 1.017209  |
| C  | -5.585350 | -2.213318 | -0.123941 |
| C  | -4.712083 | -1.641142 | -1.222465 |
| C  | -1.988347 | -0.238861 | 1.015554  |
| C  | -1.207604 | 0.713209  | 0.403098  |
| C  | -1.727745 | 1.438047  | -0.815642 |
| C  | -1.263173 | 2.881529  | -1.113000 |
| C  | -2.056208 | 3.927617  | -0.332498 |
| O  | 0.089223  | 3.088004  | -0.966758 |
| Ni | 0.569089  | 0.213861  | 0.568953  |
| N  | 2.293672  | -0.353274 | 1.488148  |
| C  | 3.017890  | -1.234288 | 0.769826  |
| C  | 4.298916  | -1.623099 | 1.169142  |
| C  | 4.826533  | -1.100864 | 2.344994  |
| C  | 4.064939  | -0.200258 | 3.088461  |
| C  | 2.807092  | 0.149885  | 2.611340  |
| C  | 2.346588  | -1.735443 | -0.442704 |
| C  | 2.851139  | -2.770321 | -1.233865 |
| C  | 2.147012  | -3.168406 | -2.363621 |
| C  | 0.945719  | -2.528689 | -2.667874 |
| C  | 0.503446  | -1.516880 | -1.826430 |
| N  | 1.182943  | -1.118246 | -0.745258 |
| H  | -1.408428 | 0.838728  | -1.698352 |
| H  | -2.840055 | 1.422535  | -0.833377 |
| H  | -1.572354 | 3.035708  | -2.182519 |
| H  | -1.913202 | 3.845322  | 0.761775  |
| H  | -1.720852 | 4.938802  | -0.631195 |
| H  | -3.140809 | 3.850131  | -0.540786 |
| H  | -1.693357 | -0.668658 | 1.983625  |
| O  | -4.191459 | -0.122458 | 2.551247  |
| H  | -6.265534 | -0.346102 | 0.725057  |
| H  | -6.112593 | -1.630865 | 1.925838  |
| H  | -6.604092 | -2.440628 | -0.487799 |
| H  | -5.150893 | -3.172040 | 0.226881  |
| H  | -4.670917 | -2.305765 | -2.104884 |
| H  | -5.130385 | -0.671742 | -1.565759 |
| H  | -2.810783 | -2.416025 | -0.541119 |
| H  | -2.702504 | -0.894179 | -1.448940 |
| H  | 2.177726  | 0.869792  | 3.153778  |
| H  | 4.439156  | 0.229495  | 4.022561  |
| H  | 5.828490  | -1.393096 | 2.676183  |
| H  | 4.886952  | -2.321028 | 0.565784  |
| H  | -0.437270 | -0.988288 | -2.027989 |
| H  | 0.356263  | -2.805846 | -3.546938 |
| H  | 2.529263  | -3.975097 | -2.997441 |
| H  | 3.785432  | -3.271318 | -0.964029 |
| Zn | 1.419214  | 1.811401  | -1.196011 |
| C  | 3.126934  | 1.253008  | -1.989097 |
| H  | 2.958816  | 0.410726  | -2.689572 |
| H  | 3.615169  | 2.074096  | -2.548651 |
| H  | 3.828212  | 0.905229  | -1.205156 |
| C  | -0.274193 | 1.595214  | 1.681744  |
| H  | -0.881229 | 2.502877  | 1.549644  |
| H  | -0.481777 | 1.169358  | 2.682588  |
| H  | 0.774459  | 1.993708  | 1.634284  |
